# Supplementary material for: Dynamic prediction of carbon prices based on the multi-frequency combined model
Source: PeerJ journal article supplement (doi:10.7717/peerj-cs.2827), 2025-04-17
Supplement: Source_code.zip [file Source_code.zip]

## Sheet: Sheet
date	Y	EUA-1	DAX-1	SP500-1	CSI300-1	上证综合指数-1	BRENT-1	NYMEX-1	COAL-1	DCOAL-1	AQI-1	USDCNY	EURCNY	百度指数-碳中和	百度指数-碳交易	百度指数-碳达峰	百度指数-碳汇
2018/01/02
2018/01/03	0.06	0.02	106.82	17.25	23.99	20.78	1.27	-0.05	14	0.4	117	-0.02	0.01	58	406	0	-41
2018/01/04	-0.27	-0.06	189.68	10.93	17.42	16.6	0.23	-0.11	15	10.8	50	0.01	-0.02	-58	368	0	-18
2018/01/05	-0.32	0.01	151.75	19.16	9.94	6.04	-0.45	-0.09	-6.5	4.2	105	-0.01	0.03	67	324	0	-18
2018/01/08	0.31	-0.13	48.14	4.56	21.41	17.73	0.16	0.04	30	4.4	103	-0.01	-0.03	-11	374	0	29
2018/01/09	0.28	0.13	17.81	3.58	29.14	4.42	1.04	0.12	-6	-2	73	0.02	-0.04	13	352	0	14
2018/01/10	0.13	0.11	-104.25	-3.06	18.51	7.93	0.38	-0.04	-27.5	6.8	81	0.02	0.01	-3	354	0	-28
2018/01/11	-0.12	-0.07	-78.44	19.33	-2.22	3.51	0.06	0.18	20	-1.4	75	-0.01	0.01	0	332	0	0
2018/01/12	0.03	0.04	42.13	18.68	19.41	3.6	0.61	0.11	-31.5	-4	102	-0.02	0.03	-56	335	0	-7
2018/01/15	-0.14	-0.06	-44.52	-4.91	0.24	-18.45	0.39	-0.07	-18.5	-2.2	124	-0.03	0.05	-15	349	0	-1
2018/01/16	0.15	0.25	45.82	-4.91	33.23	26.1	-1.11	-0.01	-49.5	3.6	167	-0.02	0.03	13	368	0	11
2018/01/17	-0.58	0.13	-62.37	26.14	-10.35	8.08	0.23	0.14	6.5	2.2	152	-0.01	-0.01	52	312	0	0
2018/01/18	0.22	0.31	97.47	-4.53	23.3	30.08	-0.07	-0.05	-8	10.6	191	0.01	-0.04	-1	340	0	64
2018/01/19	-0.03	0.27	153.02	12.27	13.98	13.11	-0.7	-0.02	11.5	-0.2	214	-0.02	0.01	-62	324	0	-40
2018/01/22	0.19	-0.01	29.24	22.67	51.2	13.5	0.42	0.06	-16	9.6	115	-0.01	-0.01	1	303	0	-9
2018/01/23	-0.07	0.26	95.91	6.16	46.01	45.14	0.93	0.28	13	1.2	155	-0.01	0	67	330	0	-39
2018/01/24	-0.08	0.44	-144.86	-1.59	7.28	12.97	0.57	-0.1	4.5	8.2	69	-0.01	0.01	-131	292	0	-18
2018/01/25	0	-0.21	-116.38	1.71	-24.81	-11.16	-0.11	0.02	30	3.4	49	-0.02	0.04	70	314	0	50
2018/01/26	-0.42	-0.15	41.81	33.62	16.22	9.82	0.1	-0.28	-18	4.6	56	-0.03	-0.04	-6	288	0	-4
2018/01/29	0.36	-0.09	-15.69	-19.34	-79.28	-35.13	-1.06	0.01	-14.5	5.8	106	-0.01	0	0	275	0	-51
2018/01/30	0.51	-0.11	-126.77	-31.1	-45.92	-34.99	-0.44	-0.01	8.5	-12	101	0	-0.02	-3	292	0	-20
2018/01/31	-0.3	0.39	-8.23	1.38	19.8	-7.18	0.03	-0.2	-1.5	-2.4	88	0	0.02	5	298	0	29
2018/02/01	-0.29	-0.01	-185.58	-1.83	-30	-33.85	0.6	-0.08	-4.5	1.6	104	-0.03	-0.04	-3	271	0	-30
2018/02/02	0.12	-0.31	-218.74	-59.85	25.33	15.1	-1.07	-0.03	42.5	-5.6	88	-0.01	0.04	59	275	0	9
2018/02/05	-0.33	0.12	-97.67	-113.19	2.92	25.42	-0.96	-0.11	37.5	3.8	78	0.01	-0.02	-56	271	0	-27
2018/02/06	0.26	-0.27	-294.83	46.2	-125.26	-116.85	-0.76	0.01	-10	-6.8	93	0.01	-0.04	2	232	0	14
2018/02/07	0.03	0.19	197.77	-13.48	-98.39	-61.39	-1.35	-0.06	9	-3.8	118	-0.02	-0.02	-2	252	0	18
2018/02/08	0.06	0.13	-330.14	-100.66	-38.45	-47.21	-0.7	-0.01	-4	-7.2	118	-0.01	-0.08	-7	243	0	-23
2018/02/09	0.03	0.11	-152.81	38.55	-171.4	-132.2	0.03	-0.08	-8	2	128	0.04	0.04	5	242	0	-5
2018/02/12	-0.62	0.25	175.29	36.45	49.45	24.28	0.83	-0.05	8	-14	79	-0.02	-0.02	-3	217	0	12
2018/02/13	-0.25	0.41	-86.27	6.94	45.53	30.83	-0.42	0.05	0.5	1.6	89	0.02	0.05	0	181	0	-17
2018/02/14	1.14	-0.29	142.66	35.69	31.33	14.2	0.17	-0.01	9	7.2	114	0.02	0.06	-61	169	0	-32
2018/02/22	1.06	0.12	122.75	5.33	85.77	69.4	0.97	0.02	4.5	11.8	115	0.01	-0.03	0	214	0	24
2018/02/23	-1.63	0.09	21.88	43.34	18.36	20.46	0.92	0.05	20	-3.8	80	0	0.03	63	236	0	25
2018/02/26	-0.42	-0.18	43.25	32.3	47.33	40.55	0.19	0.02	14	-9.6	101	-0.01	-0.04	7	275	0	41
2018/02/27	0.54	0.52	-36.31	-35.32	-59.44	-37.5	-0.87	0	16.5	-1.4	44	-0.03	-0.01	56	271	0	-21
2018/02/28	0.15	-0.05	-54.88	-30.45	-35.34	-32.66	-0.85	-0.02	-16	-3.6	51	0.02	-0.04	-60	253	0	12
2018/03/01	-0.92	-0.11	-244.91	-36.16	25.45	14.34	-1.95	0.02	-11.5	-3.8	75	0.01	-0.02	-3	277	0	-28
2018/03/02	0.92	0.15	-277.23	13.58	-32.63	-19.22	0.54	0.02	-7	-0.4	77	-0.01	0.05	-63	241	0	-16
2018/03/05	-0.01	0.22	177.16	29.69	1.64	2.4	1.17	-0.01	-19.5	-8.2	35	0.01	0.04	127	292	0	46
2018/03/06	0.11	0.11	23	7.18	48.46	32.71	0.25	0.06	3.5	-2.6	45	0	0.01	-66	306	0	-17
2018/03/07	-0.23	0.17	131.49	-1.32	-29.91	-17.97	-1.45	0.03	-30.5	-1.2	40	-0.01	0.04	2	296	0	19
2018/03/08	-0.02	0.48	110.21	12.17	40.95	16.74	-0.73	-0.04	-23	2	60	-0.01	-0.01	-4	259	0	-21
2018/03/09	0.62	0	-8.89	47.6	31.27	18.76	1.88	-0.02	-24	-9	78	0.03	-0.04	217	244	0	34
2018/03/12	-0.51	-0.04	71.71	-3.55	18.8	19.53	-0.54	0.06	-34.5	-5.8	82	-0.02	-0.01	-88	301	0	13
2018/03/13	-0.15	0.32	-197.36	-17.71	-36.42	-16.46	-0.31	0	-14.5	-0.2	92	-0.01	0	3	293	0	0
2018/03/14	0.18	-0.2	16.71	-15.83	-17.91	-18.86	0.25	-0.05	43	2.6	72	0	0.03	-41	295	0	-18
2018/03/16	0	-0.03	151.84	2.53	-16.92	-21.5	1.32	-0.04	-6	0	49	0.01	-0.04	68	288	0	-42
2018/03/19	-0.12	-0.11	-172.56	-39.09	17.83	9.37	-0.16	-0.04	-2.5	-10.4	64	0	-0.01	-38	291	0	48
2018/03/20	-0.08	0.48	90.31	4.02	3.45	11.39	1.37	0.02	2.5	-8.2	60	-0.01	0.02	12	293	0	14
2018/03/21	0.41	1.3	1.82	-5.01	-16.65	-9.69	2.05	-0.03	3	-4	65	0.02	-0.03	-40	312	0	-43
2018/03/22	0.32	-0.51	-209.07	-68.24	-40.7	-17.47	-0.56	-0.03	-16	-0.8	90	-0.02	0.03	-14	345	0	33
2018/03/23	-0.56	0.27	-213.77	-55.43	-115.41	-110.72	1.54	-0.03	-45.5	-12.4	96	0.01	0	10	246	0	-13
2018/03/26	0.29	0.38	-99.05	70.29	-25.05	-19.04	-0.33	0.04	13.5	10.2	72	-0.01	0.01	32	348	0	10
2018/03/27	-0.3	0.69	183.57	-45.93	33.38	32.93	-0.01	0.07	8	-3.6	75	-0.04	0.01	-9	296	0	-21
2018/03/28	0.23	-0.69	-30.12	-7.62	-70.55	-44.36	-0.58	0	-20	-5.4	86	0	-0.03	-11	280	0	23
2018/03/29	-0.06	0.3	156.02	36.53	51.33	38.24	0.74	0.03	19.5	1.8	95	0.02	-0.03	1	293	0	14
2018/03/30	-0.22	0	0	-29.82	4.45	8.37	-1.31	-0.02	30.5	2.4	118	-0.01	-0.02	-13	284	0	26
2018/04/02	0.36	0	-47.14	-29.83	-11.58	-5.72	-1.32	-0.03	-0.5	-8	88	-0.01	-0.01	1	271	0	-65
2018/04/03	0.23	0.01	-47.14	32.57	-24.44	-26.55	0.48	0.02	5.5	-7.4	81	0	0	-16	265	0	25
2018/04/04	0.12	-0.25	-44.55	30.24	-7.62	-5.52	-0.1	0.01	14	-0.6	121	0.01	-0.01	22	285	0	-19
2018/04/09	0.16	0.28	303.85	-31.53	-1.93	7.18	0.63	-0.01	-9.5	-1.8	92	0.02	0.02	-28	270	0	23
2018/04/10	-0.06	0.04	135.57	43.71	74.24	52.03	2.39	-0.04	-121.5	-3.2	98	0	0.03	25	296	0	-14
2018/04/11	-0.63	0.05	-103.35	-14.68	11.17	17.76	1.02	0.01	-20	-1.8	104	-0.02	0.01	-89	281	0	-28
2018/04/12	0.43	0.16	121.04	21.8	-39.7	-27.92	-0.04	0.02	-25	-1	81	-0.01	-0.01	67	281	0	34
2018/04/13	0.24	0.35	27.39	-7.69	-27.5	-21.11	0.56	0.05	8	0.6	41	0.01	-0.02	12	265	0	-33
2018/04/16	-1.02	0.05	-50.99	21.54	-62.28	-48.4	-1.16	0.01	-30.5	13.6	246	0	0	-64	290	0	19
2018/04/17	0.73	-0.25	194.16	28.55	-60.22	-43.85	0.16	-0.01	24.5	15.8	141	-0.01	0.02	65	323	0	15
2018/04/18	0.02	0.15	5.26	2.25	17.64	24.6	1.9	0	22.5	6	112	0	0	-79	283	0	15
2018/04/19	0.52	-0.43	-23.41	-15.51	45.56	25.98	0.3	-0.06	25.5	-0.2	93	0	0.01	84	347	0	-25
2018/04/20	-0.5	-0.41	-26.92	-22.99	-50.99	-45.84	0.28	0.07	-44	-4	88	0.01	-0.02	-23	289	0	-7
2018/04/23	0.05	-0.16	31.89	0.15	5.48	-3.53	0.65	-0.01	47	16	34	0.01	-0.02	10	315	0	0
2018/04/24	0.04	0.33	-21.57	-35.73	77.16	60.92	-0.85	0.04	4.5	1.2	59	0.02	-0.03	-6	277	0	-5
2018/04/25	-0.01	0.03	-128.52	4.84	-14.79	-10.96	0.14	0.03	-16.5	-11.2	62	-0.01	0	-68	271	0	11
2018/04/26	0.09	0.23	78.17	27.54	-73.21	-42.94	0.74	0.02	3	0.2	67	0.02	-0.01	63	293	0	-5
2018/04/27	-0.13	0.07	80.4	2.97	1.39	7.2	-0.1	-0.06	-11	3.8	85	0.01	-0.03	-2	269	0	-18
2018/05/02	0.47	-0.49	221.38	-34.24	6.77	-1.05	-1.28	-0.01	47.5	-1	82	0.03	-0.04	11	291	0	51
2018/05/03	-0.04	-0.1	-112.1	-5.94	29.35	19.68	0.27	-0.03	-5.5	-2.2	74	0	-0.02	-2	289	0	-52
2018/05/04	-0.16	0.06	129.45	33.69	-18.4	-9.83	1.24	-0.02	18	8	68	-0.02	0	4	307	0	-10
2018/05/07	-0.15	0.6	128.54	9.21	59.59	45.61	1.3	0.03	32	10.8	51	0.01	-0.01	-7	325	0	24
2018/05/08	-0.05	-0.02	-35.93	-0.71	44.49	24.86	-1.32	0	-1.5	-6	48	0.01	-0.01	-1	302	0	2
2018/05/09	-0.05	0.4	30.85	25.87	-7.06	-2.35	2.36	0	-19.5	-7	83	0	-0.03	0	307	0	25
2018/05/10	0.03	0.61	79.81	25.28	21.44	15.26	0.26	0.07	12.5	11.6	69	0.01	0	2	303	0	-30
2018/05/11	0.06	0.03	-21.63	4.65	-20.22	-11.15	-0.35	0.01	19.5	8.4	92	-0.03	0.01	6	254	0	9
2018/05/14	-0.08	0	-23.53	2.41	36.45	10.77	1.11	0.02	0	9.6	67	-0.02	0	-9	269	0	-22
2018/05/15	0	-0.31	-7.67	-18.68	14.81	18.09	0.2	-0.01	10	2.8	57	0.02	0	-58	300	0	39
2018/05/16	0.01	0.86	26.29	11.01	-31.26	-22.55	0.85	-0.01	1	5.8	58	0.02	-0.03	65	283	0	-13
2018/05/17	0.02	0.12	118.28	-2.33	-28.79	-15.29	0.02	0.03	-24	-3.6	62	0	-0.02	-6	334	0	13
2018/05/18	-0.12	-0.05	-36.89	-7.16	39.01	39.02	-0.79	-0.01	-17.5	-4.4	48	0.01	0	-63	238	0	-45
2018/05/21	0.03	0.31	0	20.04	18.18	20.54	0.71	-0.01	2	-10.8	35	0.01	-0.01	-5	256	0	50
2018/05/22	-0.01	0.39	92.2	-8.57	-15.03	0.51	0.35	0.07	-11	-9.4	51	-0.01	0.01	9	277	0	-33
2018/05/23	0.06	0.06	-193.08	8.85	-51.63	-45.39	0.23	0.02	-45.5	-24.8	105	0	-0.01	-4	267	0	-28
2018/05/24	0.55	0.28	-121.75	-5.53	-27.36	-14.31	-1.01	0.01	14.5	6.4	71	0	-0.04	2	242	0	7
2018/05/25	1.42	-0.29	82.92	-6.43	-10.72	-13.35	-2.35	0.03	-14.5	-2	69	0.01	0.01	-5	265	0	3
2018/05/28	-0.7	0.31	-74.55	-15.73	16.76	-6.22	-1.14	0.03	21	22	104	0.01	0	7	315	0	20
2018/05/29	0.15	-0.01	-196.95	-15.74	-29.25	-14.62	0.09	-0.09	22	11.8	115	0	-0.04	-4	300	0	0
2018/05/30	0.42	-0.46	117.25	34.15	-80.64	-79.02	2.11	0	-14.5	0.2	73	0.02	-0.03	4	312	0	2
2018/05/31	-0.39	-0.93	-178.87	-18.74	79.01	54.03	0.09	0.05	34.5	0.2	55	-0.01	0.07	-7	307	0	17
2018/06/01	-0.25	0.38	119.38	29.35	-31.79	-20.33	-0.8	0.03	14.5	12.2	79	0	0.02	11	227	0	-21
2018/06/04	0.19	0.84	46.48	12.25	36.99	16.05	-1.5	-0.05	-14.5	-3.4	74	0.01	-0.01	62	312	0	3
2018/06/05	-0.06	-0.36	16.38	1.93	37.74	23.02	0.09	-0.04	5.5	0	77	0	0.02	5	293	0	37
2018/06/06	-0.31	0.16	42.94	23.55	-7.97	0.97	-0.02	0.01	1.5	-3	92	-0.02	0	-2	282	0	-27
2018/06/07	0.04	0.07	-19.02	-1.98	-6.34	-5.68	1.96	0.03	13.5	7.8	79	-0.01	0.02	-67	283	0	-18
2018/06/08	0.15	-0.18	-44.5	8.66	-51.39	-42.35	-0.86	-0.02	-3.5	1.4	44	0.01	0.02	-11	280	0	23
2018/06/11	-0.19	-0.33	76.36	2.97	0.36	-14.37	0	0.04	-11.5	-9.2	80	0.01	-0.01	9	293	0	-20
2018/06/12	-0.07	-0.34	-0.61	4.85	45.97	27.02	-0.58	-0.01	33.5	19.4	90	0	0	57	281	0	20
2018/06/13	-0.02	0.16	48.28	-11.22	-37.61	-30	0.86	0.02	-21.5	-3	69	0.01	0	0	300	0	60
2018/06/14	0.02	-0.4	216.52	6.86	-14.97	-5.64	-0.8	0.01	-2.5	-3.2	78	-0.02	0.01	19	285	0	-63
2018/06/15	0.2	-0.38	-96.55	-2.83	-19.94	-22.26	-2.5	0.06	10.5	17.4	98	0.03	-0.11	-20	301	0	-4
2018/06/19	0.1	-0.29	-332.58	-17.07	-132.31	-114.08	1.64	-0.11	-64.5	-16.2	59	-0.01	0.03	-54	263	0	-40
2018/06/20	-0.1	0.26	17.19	4.73	14.32	7.91	-0.34	0.05	9.5	5.4	42	0.04	0.03	57	251	0	30
2018/06/21	0.04	0.31	-183.25	-17.56	-42.47	-39.92	-1.69	0.01	-25	-6.6	71	0.01	-0.01	12	274	0	-10
2018/06/22	-0.03	0.31	67.81	5.12	15.93	13.95	2.5	-0.04	0	-1	43	0.01	0.03	-8	255	0	-11
2018/06/25	0.09	-0.1	-309.39	-37.81	-48.42	-30.42	-0.82	-0.01	10	0	46	0.01	0.05	23	220	0	39
2018/06/26	0.05	0	-35.99	5.99	-29.37	-14.83	1.58	0.02	-18	-9.4	44	0.03	0.06	-90	286	0	-32
2018/06/27	0	0.22	114.27	-23.43	-71.85	-31.33	1.31	0.04	-5.5	0	47	0.04	0.01	0	235	0	-3
2018/06/28	0	-0.25	-171.38	16.68	-35.73	-26.28	0.23	-0.04	13	11	44	0.04	0	64	237	0	16
2018/06/29	0.15	-0.01	128.77	2.06	87.45	60.52	1.59	-0.03	17	3.8	54	0.02	0.01	-4	216	0	-20
2018/07/02	0.05	0.08	-67.83	8.34	-103.02	-71.86	-2.14	-0.06	-34	-10.2	49	0	0.07	5	258	0	0
2018/07/03	0.24	0.03	110.97	-13.49	1.32	11.33	0.46	0	-1.5	-0.2	54	0.03	0.02	-70	283	0	20
2018/07/04	-0.46	0.42	0	11.7	-45.53	-27.76	0.48	-0.02	-10.5	5.2	49	0.01	0.03	0	259	0	-31
2018/07/05	0.62	0.16	115.15	11.69	-21.31	-25.25	-0.85	-0.01	-4	-9	27	-0.04	-0.05	68	226	0	0
2018/07/06	0.23	0.02	22.31	23.21	22.68	13.35	-0.28	0.02	1	-6	37	0.01	0.04	-63	209	0	3
2018/07/09	0.47	0.3	0	24.35	94.06	67.88	0.96	-0.02	6	2.2	28	0.01	0.04	2	230	0	36
2018/07/10	0.59	0.05	123.25	9.67	8.34	12.52	0.79	-0.05	-15	-3.2	62	-0.01	-0.01	8	239	0	10
2018/07/11	0.45	0.27	-192.72	-19.82	-59.99	-49.86	-5.46	0.05	3.5	7.4	51	-0.01	-0.02	-11	207	0	-24
2018/07/12	0.05	-0.23	37.21	24.27	73.53	59.89	1.05	-0.03	7.5	0.2	44	0.05	0.03	83	211	0	-1
2018/07/13	0.98	-0.03	87.44	3.02	11.63	-6.48	0.88	-0.04	-23.5	-15.2	37	0	-0.02	-17	220	0	-4
2018/07/16	-0.9	-0.13	19.24	-2.88	-20.6	-17.14	-3.49	0.01	8.5	1.2	62	0.01	0.02	-129	204	0	29
2018/07/17	0.68	0.15	0	11.12	-22.71	-15.91	0.32	-0.03	9.5	-1.2	66	0	0.02	134	248	0	-12
2018/07/18	0.09	0.33	204.92	6.07	-18.06	-10.87	0.74	-0.01	-8	-6.8	60	0.01	-0.02	25	253	0	1
2018/07/19	0.04	0.45	-51.87	-11.13	-2.98	-14.71	-0.32	0.04	20.5	5.8	55	0.02	0.01	-96	230	0	-7
2018/07/20	-0.07	0.21	-219.3	-2.66	64.55	56.72	0.49	-0.01	6	2	67	0.06	0.07	1	220	0	8
2018/07/23	0.4	0.32	0	5.15	32.86	30.27	-0.01	-0.04	1.5	-6.8	48	-0.01	0.05	6	225	0	-7
2018/07/24	0.33	-0.29	194.79	13.42	55.96	46.02	0.38	0.02	10.5	1.4	73	0.03	0.01	-11	221	0	-7
2018/07/25	1.06	0.24	-110.23	25.67	-3.96	-1.91	0.49	0.04	18.5	-2.8	54	0.01	0.01	0	272	0	4
2018/07/26	1.08	-0.05	229.9	-8.63	-41.5	-21.42	0.61	-0.02	-1	-6.4	54	-0.03	-0.01	2	257	0	-11
2018/07/27	0.07	-0.19	51.17	-18.62	-15.02	-8.64	-0.25	0.03	-0.5	-2.8	51	0.02	-0.03	-2	207	0	12
2018/07/30	1.4	-0.06	-62.2	-16.22	-6.15	-4.54	0.68	0.01	1	-9.8	74	0.02	0.04	70	206	0	11
2018/07/31	0.16	0.36	7.3	13.69	2.58	7.35	-0.72	-0.02	1.5	-5.6	56	0.01	0.03	6	234	0	-23
2018/08/01	0.82	0.38	-68.45	-2.93	-70.27	-51.87	-1.86	-0.03	-11.5	-5.6	80	0.01	0.01	4	225	0	-11
2018/08/02	0	-0.15	-190.72	13.86	-76.43	-56.51	1.06	0.07	5.5	-7.8	75	-0.04	-0.06	-12	208	0	32
2018/08/03	-0.35	0.04	69.43	13.13	-55.68	-27.58	-0.24	0.03	10.5	11.6	51	0.04	-0.01	-127	203	0	-26
2018/08/06	0.62	-0.1	-17.55	10.05	-42.01	-35.28	0.54	0.01	28.5	13	67	0.02	0.01	122	239	0	37
2018/08/07	1.85	-0.06	49.98	8.05	95.6	74.21	0.9	0.03	23	17.6	78	-0.01	-0.02	7	230	0	13
2018/08/08	0.65	-0.11	-14.65	-0.75	-54.36	-35.3	-2.37	0.06	19.5	1.4	71	-0.01	0.02	-1	216	0	-45
2018/08/09	0.85	0.2	42.57	-4.12	83.02	50.31	-0.21	0	2	0	86	0	0	-65	225	0	8
2018/08/10	0.7	0.29	-251.76	-20.3	7.49	0.93	0.74	-0.01	-38.5	-4	79	0.01	-0.05	65	221	0	-22
2018/08/13	-0.88	0.1	-65.61	-11.35	-14.68	-9.44	-0.2	-0.01	22	15	41	0.02	-0.05	-67	228	0	45
2018/08/14	0.48	0.17	0.13	18.03	-17.43	-4.91	-0.15	0.03	-11	-10.6	35	0.01	0.01	-2	241	0	-29
2018/08/15	0	-0.07	-195.86	-21.59	-80.93	-57.7	-1.7	-0.02	23.5	-10.6	48	0.02	-0.03	68	224	0	22
2018/08/16	0.01	-0.1	74.16	15.88	-15.25	-18.07	0.67	-0.03	-7	-6	47	0	0.02	14	244	0	-10
2018/08/17	0.04	0.15	-26.62	15.88	-47.11	-36.22	0.4	0.03	27	0.8	37	0	0.01	-77	218	0	-33
2018/08/20	-0.71	0.35	120.75	6.92	37.63	29.5	0.38	0.01	36.5	-4.4	32	-0.02	0.03	0	223	0	35
2018/08/21	-1.29	0	53.19	5.91	59.4	35.36	0.42	0.04	-38.5	5.2	49	-0.03	0	67	202	0	-14
2018/08/22	0.31	1.33	1.21	-1.14	-18.7	-19.22	2.15	-0.03	43.5	13.2	59	-0.01	0.03	-63	193	0	-21
2018/08/23	-0.11	0.58	-20.12	-4.84	12.08	10.01	-0.05	0.01	-37.5	0.6	69	0.01	0.02	61	235	0	16
2018/08/24	0.03	0.29	28.94	17.71	5.3	4.81	1.09	-0.06	-5.5	7.6	56	0.03	0.02	-61	226	0	4
2018/08/27	-0.27	0.63	143.79	22.05	81.24	51.47	0.39	-0.04	-28	-11	43	-0.02	0.04	-9	225	0	3
2018/08/28	-0.61	-0.63	-10.89	0.78	-6.4	-2.92	-0.26	-0.02	10.5	4.4	48	-0.04	-0.03	71	257	0	-5
2018/08/29	0.48	0.37	34.26	16.52	-13.6	-8.69	1.19	0.02	-28	2.6	53	0	0.01	-130	231	0	-1
2018/08/30	-0.33	0.11	-67.44	-12.91	-35.48	-31.55	0.63	0.01	9	5	47	0	0.02	61	239	0	6
2018/08/31	0.93	-0.07	-130.18	0.39	-16.59	-12.49	-0.35	0.04	-5.5	-9.4	41	0.01	-0.02	72	186	0	-13
2018/09/03	-0.39	-0.85	-17.65	-2.4	-12.68	-4.52	0.73	-0.05	-24.5	-10	53	0.01	-0.03	-69	218	0	13
2018/09/04	-0.09	-0.07	-136.2	-2.4	42.08	29.85	0.02	-0.06	3.5	9.6	78	-0.01	-0.01	4	236	0	-7
2018/09/05	0.05	0.2	-169.75	-8.12	-65.76	-46.24	-0.9	-0.02	14	-1	89	0.01	-0.01	61	238	0	57
2018/09/06	0.13	1.1	-85.21	-10.55	-35.26	-12.75	-0.77	-0.01	42.5	8.8	48	-0.01	0.03	-63	250	0	-5
2018/09/07	-0.28	1.75	4.38	-6.37	14.76	10.71	0.33	0	-10.5	3.6	42	0	-0.01	2	202	0	-16
2018/09/10	-0.03	2	26.71	5.45	-47.57	-32.82	0.54	0.03	47	10.4	55	0.02	-0.02	67	231	0	-6
2018/09/11	0.56	-1.06	-16.07	10.76	-5.86	-4.68	1.69	0.02	-32.5	-11	63	0.01	0.03	-4	247	0	-24
2018/09/12	-0.65	-1.21	62.03	1.03	-22.19	-8.69	0.68	-0.01	-19.5	3.4	69	0	0.01	0	243	0	19
2018/09/13	0.35	-4.05	23.25	15.26	34.55	30.47	-1.56	-0.01	19	-5.6	72	0	0.02	-55	235	0	-6
2018/09/14	2.32	1.07	68.78	0.8	5.52	-4.94	-0.09	-0.04	11.5	7.6	60	-0.01	0.02	-6	213	0	-6
2018/09/17	-0.87	0.96	-27.92	-16.18	-37.17	-29.85	-0.04	0.05	-6.5	-5.8	43	0.01	-0.02	-9	229	0	24
2018/09/18	-1.98	-0.71	61.26	15.51	64.51	48.16	0.98	0.11	6	1.8	34	0.01	0.03	88	238	0	-8
2018/09/19	0.58	1.24	61.35	3.64	43.05	30.9	0.37	-0.02	8	5	42	0	0.01	-14	233	0	9
2018/09/20	1	0.55	107.46	22.8	-2.35	-1.61	-0.7	0.05	-29.5	7.8	41	-0.01	-0.01	-9	221	0	-37
2018/09/21	-1.18	0.1	104.4	-1.08	100.36	68.24	0.1	0.02	10	-4	38	-0.01	0.05	8	198	0	17
2018/09/25	0.7	-0.89	-56.22	-14.11	-30.69	-16.34	3.07	0.1	-9	-4	58	0	-0.01	11	203	0	-12
2018/09/26	0.34	-1.01	11.23	-9.59	37.44	25.67	-0.53	-0.11	9	2	35	0.02	0.03	0	212	0	4
2018/09/27	-0.3	0.59	49.7	8.03	-13.65	-15.04	0.38	0.09	-18	0	40	0	-0.01	-17	226	0	-8
2018/09/28	0.16	0.39	-188.86	-0.02	35.27	29.58	1	-0.06	4	3	55	0.02	-0.05	6	246	0	1
2018/10/08	0.1	0.73	-299.57	-29.55	-147.96	-104.84	1.19	0.28	57.5	13.4	95	0.02	-0.06	-67	224	0	10
2018/10/09	0	-1.14	30.06	-4.09	-2.21	4.5	1.09	0.03	3	12.6	89	0	-0.02	15	384	0	9
2018/10/10	0.28	-1.32	-264.72	-94.66	-7.09	4.83	-1.91	-0.03	30.5	3.8	65	0.01	0.01	-14	302	0	-11
2018/10/11	-0.29	0.42	-173.15	-57.31	-157.49	-142.38	-2.83	-0.04	3	-6.8	57	0	0.03	63	226	0	16
2018/10/12	1.69	0.5	-15.54	38.76	46.62	23.45	0.17	-0.09	9	6.2	65	0	0.03	-66	214	0	-16
2018/10/15	-1.66	-1.78	90.35	-16.34	-44.28	-38.81	0.35	0.11	-25	-6.2	57	0.01	-0.01	-1	250	0	-10
2018/10/16	0.22	0.71	162.39	59.13	-25.48	-21.77	0.63	-0.01	17	2.2	50	-0.01	0.02	82	246	0	62
2018/10/17	0.38	-0.02	-61.52	-0.71	17.28	15.28	-1.36	0.07	32	2.2	58	0	-0.01	7	239	0	-19
2018/10/18	-0.04	0.47	-125.82	-40.43	-73.86	-75.19	-0.76	-0.09	-15	-7.8	74	0.02	-0.03	-13	272	0	-10
2018/10/19	0.53	-0.03	-35.38	-1	90.56	64.05	0.49	0	-28.5	-12	54	0.01	-0.02	-70	236	0	-44
2018/10/22	-0.07	-0.61	-29.49	-11.9	135.32	104.41	0.05	-0.09	5.5	-3.6	52	-0.02	0.02	73	255	0	56
2018/10/23	0.01	0.14	-250.06	-15.19	-86.84	-60.05	-3.39	0.08	27	1	72	0.01	-0.02	-11	274	0	-13
2018/10/24	0.66	0.38	-82.65	-84.59	4.77	8.47	-0.27	-0.03	6.5	2.6	90	0.01	0.01	-64	252	0	5
2018/10/25	0.37	-0.53	115.49	49.47	6.11	0.5	0.72	-0.02	20	-6.4	72	0	-0.04	67	275	0	-7
2018/10/26	1.71	-0.8	-106.5	-46.88	-20.67	-4.95	0.73	0.08	-6	-6.2	57	0.01	-0.02	-3	238	0	-7
2018/10/29	-3.21	-1.6	134.86	-17.44	-96.75	-56.75	-0.28	-0.07	-21	7	64	-0.01	0.01	-3	235	0	-15
2018/10/30	1.66	-0.66	-48.09	41.38	33.37	25.95	-1.43	0.03	6	0.8	80	0.02	0	6	199	0	3
2018/10/31	0.38	0.34	160.12	29.11	43.56	34.73	-0.44	0.07	-1	-7.6	76	0	-0.01	-63	242	0	7
2018/11/01	-0.95	-0.74	21.03	28.63	23.21	3.46	-2.58	-0.04	-8	-1.8	81	0.01	-0.01	56	234	0	3
2018/11/02	-0.07	1.46	50.45	-17.31	113.22	70.24	-0.06	0.06	-24.5	-2.6	63	-0.03	0.02	-50	215	0	-32
2018/11/05	-1.32	0.15	-24.03	15.25	-27.41	-11.05	0.34	0.26	23.5	0	85	-0.04	-0.04	61	242	0	51
2018/11/06	0.12	0.34	-10.62	17.14	-19.69	-6.07	-1.04	-0.03	-14	1.2	13	0.01	0.01	-13	238	0	4
2018/11/07	0.04	1.05	94.76	58.44	-21.24	-18.02	-0.06	0	-9	-9.2	20	0	0.02	16	261	0	-12
2018/11/08	-0.63	0.94	-51.78	-7.06	-9.14	-5.71	-1.42	0.03	-3	3.6	44	0.01	0	-11	216	0	-15
2018/11/09	-0.32	-0.06	1.84	-25.82	-45.33	-36.76	-0.47	0.16	-14.5	4	50	0.01	-0.02	-65	232	0	-7
2018/11/12	0.46	1	-203.72	-54.79	37.7	31.65	-0.06	0.22	17	-10.4	94	0.02	-0.01	61	277	0	20
2018/11/13	0.44	-0.36	146.78	-4.04	32.24	24.36	-4.65	0.13	-27.5	-13.8	80	0.01	-0.05	16	235	0	-29
2018/11/14	0.24	-0.4	-59.69	-20.6	-32.44	-22.64	0.65	0.62	27	19.6	61	-0.02	0.03	-9	271	0	56
2018/11/15	0.46	-0.74	-58.86	28.62	37.43	35.93	0.5	-0.79	22	-9.2	64	0	0	3	269	0	-25
2018/11/16	-0.18	0.11	-12.67	6.07	15.3	10.94	0.14	0.49	3	4.8	61	0	0.01	-71	212	0	-13
2018/11/19	0.04	-0.18	-96.46	-45.54	36.93	24.4	0.03	0.19	-2.5	-10.4	73	-0.02	0.04	-5	235	0	-2
2018/11/20	-1.05	0.53	-178.13	-48.84	-76.19	-57.66	-4.26	-0.06	-11	4	60	0.01	0.03	75	263	0	-1
2018/11/21	1.55	1.03	177.76	8.04	8.08	5.66	0.95	-0.07	7	6.4	96	0.01	-0.03	-68	250	0	-10
2018/11/22	2.96	0.43	-105.68	-8.68	-12.06	-6.08	-0.88	-0.21	-14.5	-0.2	113	0	0	-2	272	0	8
2018/11/23	-0.83	-0.71	54.2	-8.69	-70.95	-65.95	-3.8	0.12	-23.5	-7.2	88	-0.01	0	58	231	0	-9
2018/11/26	-1.71	-0.38	162.03	40.89	-2.24	-3.67	1.68	-0.08	-43.5	-14	135	0.02	-0.02	4	282	0	37
2018/11/27	-0.4	-0.23	-45.61	8.75	-4	-1.13	-0.27	-0.06	9.5	5.8	127	0	-0.01	-52	277	0	11
2018/11/28	1.94	-0.31	-10.23	61.58	41.69	27.06	-1.45	0.46	23.5	0	138	0	-0.02	-12	259	0	-40
2018/11/29	-1.81	0.73	-0.65	-6.02	-41.28	-34.3	0.75	-0.08	8	-7.6	141	-0.01	0.03	71	285	0	13
2018/11/30	-0.32	0.48	-40.99	22.41	35.04	20.75	-0.8	0.04	-8.5	-1.6	256	0	0.02	19	253	0	-29
2018/12/03	-0.14	0.13	208.22	30.2	88.26	66.61	2.98	-0.26	54	5.2	72	0	-0.03	-11	276	0	37
2018/12/04	0.45	0.1	-130.14	-90.31	6.76	11.16	0.39	0.13	10.5	-0.4	88	-0.05	-0.04	-73	270	0	-8
2018/12/05	0.94	-1.06	-135.08	0	-15.71	-16.15	-0.52	-0.06	18	-37	59	-0.04	-0.05	10	234	0	12
2018/12/06	0.49	0.32	-389.26	-4.11	-70.33	-44.63	-1.5	-0.08	11	5.4	19	0.01	0	-17	225	0	-5
2018/12/07	-0.65	0.3	-22.89	-62.87	-0.11	0.71	1.61	0.13	32	7.6	59	0.01	0.03	78	227	0	-55
2018/12/10	-0.87	0.57	-166.02	4.64	-36.8	-21.31	-1.7	0.02	-11	2.4	80	0	0.02	22	246	0	43
2018/12/11	1.4	-0.7	158.44	-0.94	15.06	9.51	0.23	-0.16	-251	-11.2	130	0.03	0.01	-30	234	0	10
2018/12/12	-1.22	1.31	148.92	14.29	10.79	8.06	-0.05	-0.26	11	0.6	180	0.01	-0.02	8	219	0	-4
2018/12/13	-0.49	0.85	-4.73	-1.69	49.08	31.9	1.3	0.02	41	0.4	140	-0.03	0	-15	269	0	-36
2018/12/14	0.2	1.05	-58.93	-49.43	-53.78	-40.31	-1.17	-0.33	11	-0.6	112	0	-0.01	16	203	0	34
2018/12/17	0.29	0.89	-93.57	-54.01	-4.71	4.23	-0.67	-0.22	-14	-3.4	130	0.01	-0.02	-142	261	0	8
2018/12/18	-0.19	-0.23	-31.31	0.22	-32.77	-21.32	-4.35	0.26	-26	-3	117	0	0.03	126	247	0	9
2018/12/19	-0.84	0.29	25.32	-39.2	-37.3	-27.09	1.98	-0.1	-20.5	3.4	92	0	0.01	7	234	0	-11
2018/12/20	1.03	-0.15	-155.11	-39.54	-23.71	-13.29	-2.89	-0.02	-4.5	-2.6	60	0	0.02	-4	275	0	-10
2018/12/21	-1.92	0.43	22.72	-50.84	-38.02	-20.02	-0.53	-0.04	7.5	0.6	74	-0.01	0.03	-65	243	0	-17
2018/12/24	1.91	0.24	-63.08	-65.48	8.8	10.76	-3.35	-0.21	0.5	4	70.6	0.02	-0.03	65	197	0	4
2018/12/25	-0.28	0	-63.07	58.3	-20.92	-22.19	2	-0.02	-31	-9.6	67.2	-0.01	0.01	-66	217	0	25
2018/12/26	0.99	0	-63.08	58.3	-15.25	-6.53	2	-0.02	3.5	-2.2	63.8	-0.01	0	0	233	0	-30
2018/12/27	-1.56	-0.17	-63.08	21.13	-11.52	-15.2	-2.31	0.07	0.5	6.6	60.4	0.01	-0.03	5	236	0	-7
2018/12/28	2.16	-0.03	177.45	-3.09	20.14	10.81	0.04	-0.19	7.5	1.8	57	-0.03	0.02	-2	200	0	-3
2019/01/02	-0.26	0.36	21.23	24.29	-41.11	-28.61	2.71	-0.34	-34	1.8	80	-0.01	0	97	207	0	-15
2019/01/03	-1.58	-1.96	-163.53	-62.14	-4.7	-0.93	1.04	-0.04	30	-2.4	95	0.01	-0.07	-100	204	0	26
2019/01/04	0.54	0.46	351.03	84.05	71.03	50.51	1.11	0.11	10	2.4	122	0	0.04	0	207	0	31
2019/01/07	-1	-1.43	-19.88	17.75	18.43	18.22	0.27	-0.07	9.5	6	154	-0.01	0	7	211	0	-49
2019/01/08	0.11	0.59	56.17	24.72	-6.6	-6.63	1.39	0.04	-11	-4.6	120	-0.01	0.03	-9	211	0	10
2019/01/09	-0.23	-0.8	89.34	10.55	30.78	17.88	2.72	-0.01	3.5	-3.4	55	0.01	-0.01	9	228	0	16
2019/01/10	0.87	0.08	28.27	11.68	-5.79	-9.24	0.24	-0.02	4.5	-0.4	48	-0.03	0.04	-11	219	0	-2
2019/01/11	1.38	0.65	-34.13	-0.38	22.09	18.73	-1.2	0.19	41	0	93	-0.03	-0.07	9	218	0	-23
2019/01/14	-1.76	-0.19	-31.55	-13.65	-27	-18.06	-1.49	0.41	12	16.2	112	-0.03	-0.07	-4	250	0	9
2019/01/15	-0.05	0.07	35.88	27.69	60.21	34.57	1.65	-0.12	-7.5	-2.2	147	-0.01	0.01	6	222	0	5
2019/01/16	2.72	0.76	39.45	5.8	0.66	0.08	0.68	-0.04	-6	7.2	81	0.01	-0.04	-2	199	0	-11
2019/01/17	-0.98	0.26	-12.62	19.86	-17.23	-10.78	-0.14	0.01	0	1.6	127	0	-0.01	0	190	0	-10
2019/01/18	-1.74	1.19	286.92	34.75	56.75	36.37	1.52	0	6.5	7.8	130	0.01	0.01	61	171	0	-6
2019/01/21	0	-0.4	-69.34	-18.9	17.47	14.5	0.04	-0.18	-24	-3.8	187	0.01	-0.01	-65	195	0	6
2019/01/22	-0.32	0.73	-46.09	-18.91	-42.32	-30.81	-1.24	-0.18	1.5	-11.8	149	0.01	0.01	0	203	0	4
2019/01/23	1.76	-0.48	-18.57	5.8	-2.27	1.3	-0.36	-0.03	16.5	0.6	105	0.01	0.01	-3	207	0	0
2019/01/24	-2.23	0.48	58.64	3.63	17.73	10.69	-0.05	0.1	-16	-7.6	108	-0.02	0	22	190	0	-4
2019/01/25	1.83	-1.25	151.61	22.43	25.69	10.03	0.55	-0.08	-3	5	171	0.01	-0.04	-22	164	0	-6
2019/01/28	-0.85	-1.16	-71.48	-20.91	-0.69	-4.74	-1.71	-0.16	9	-0.2	176	-0.04	0.02	130	175	0	-4
2019/01/29	-0.84	0.63	8.52	-3.85	10.19	-2.73	1.39	0.02	-13	-2.2	124	-0.01	0	-75	187	0	4
2019/01/30	0.34	-0.33	-37.17	41.05	-25.49	-18.67	0.33	-0.04	-5	-0.4	63	-0.01	0	59	177	0	11
2019/01/31	0.61	-0.75	-8.56	23.05	33.15	8.99	0.24	-0.04	65	15	73	-0.03	0	-80	180	0	-41
2019/02/01	-0.41	-0.31	7.56	2.43	45.77	33.66	0.86	-0.1	19.5	2.8	106	0.01	-0.02	-25	159	0	6
2019/02/11	1.8	0.42	-166.07	3.27	59.07	35.67	-1.24	-0.08	-21	-7.8	97	0.04	-0.04	-11	151	0	11
2019/02/12	-2.19	-1.68	111.49	34.93	23.87	17.99	0.91	0.02	24	-1.6	57	0.03	0	78	159	0	26
2019/02/13	0	0.25	41.14	8.3	66.69	49.18	1.19	-0.08	-12.5	5.4	81	-0.01	0.03	-76	182	0	-7
2019/02/14	-0.3	-1.16	-77.43	-7.3	5.11	-1.37	0.96	-0.02	-6.5	1.6	44	0	-0.04	70	177	0	19
2019/02/15	0.47	0.63	210.01	29.87	-63.44	-37.31	1.68	0.06	0	1.6	60	-0.01	0.01	-67	163	0	-25
2019/02/18	-0.23	-0.41	-0.6	2.08	107.04	71.97	0.25	0.02	-14	-4.4	67	0.01	0	6	189	0	20
2019/02/19	-0.03	0.2	10.01	2.08	-6.13	1.29	-0.05	0.01	-2.5	0.2	88	-0.01	0.01	2	193	0	-4
2019/02/20	2.76	0.27	92.76	4.94	12.32	5.57	0.65	-0.01	9.5	4	123	0	0.01	55	243	0	52
2019/02/21	-3.07	-1.66	21.31	-9.82	-9.22	-9.42	-0.03	0.06	19.5	-2.4	107	-0.04	-0.03	-63	217	0	-43
2019/02/22	0.25	0.14	34.42	17.79	77.41	52.43	0.05	-0.01	10	-2.6	63	0	-0.01	0	200	0	-15
2019/02/25	-0.21	0.3	47.69	3.44	209.36	157.05	-2.36	0.11	-4	7.8	100	-0.01	-0.01	77	221	0	18
2019/02/26	-0.4	0.42	35.4	-2.21	-44.79	-19.76	0.45	-0.04	4	2.2	155	-0.01	0	-12	226	0	14
2019/02/27	0.79	1.61	-53.46	-1.52	-6.3	12.3	1.18	0.04	0.5	9.6	55	-0.01	0.01	0	258	0	28
2019/02/28	0.06	0.42	28.31	-7.89	-9.02	-12.87	-0.36	0	0.5	1.8	50	0	-0.01	0	216	0	-10
2019/03/01	-0.39	0.59	86.04	19.2	80.34	53.06	-0.96	0.04	17.5	15.6	40	0.01	0	12	226	0	-45
2019/03/04	-0.24	0.85	-9.02	-10.88	44.39	33.57	0.6	0	-31.5	-4.6	72	0	0.01	-67	264	0	41
2019/03/05	1.64	-0.2	28.08	-3.16	21.91	26.67	0.19	0.04	-3.5	-4.2	54	0	-0.02	62	231	0	12
2019/03/06	-1.14	-0.79	-33.11	-18.2	32.08	47.85	0.13	-0.05	-12	4.4	59	0.01	-0.02	-66	248	0	20
2019/03/07	0.03	1.13	-69.83	-22.52	-39.24	4.32	0.31	0.03	6	-2.4	68	0	0.01	57	240	0	-19
2019/03/08	0.52	-0.26	-59.96	-5.86	-151.27	-136.56	-0.56	-0.01	-35.5	-9.8	82	0.01	-0.06	11	226	0	-30
2019/03/11	-0.76	-0.73	85.64	40.23	72.37	57.13	0.84	-0.08	-11	-10.6	98	0	0.02	-70	224	0	38
2019/03/12	0.32	0.04	-19.31	8.22	25.4	33.32	0.09	0.02	2	1	84	-0.01	0.01	88	220	0	19
2019/03/13	-1.06	-0.05	48.24	19.4	-31.16	-33.36	0.88	0.04	4	-4.6	96	0	0.02	-6	257	0	-41
2019/03/14	0.98	0.46	15.06	-2.44	-25.7	-36.26	-0.32	0.01	2	3.4	72	-0.01	0.01	-68	223	0	19
2019/03/15	-0.29	-0.27	98.22	14	46.52	31.06	-0.07	-0.06	3	3	72	0.02	0	48	218	0	-25
2019/03/18	0.03	-0.65	-28.63	10.46	106.74	74.67	0.38	0.05	-6	-2.8	70	-0.01	0.01	9	283	0	3
2019/03/19	-0.01	-0.7	131.35	-0.37	-17.79	-5.44	0.07	0.02	-3.5	-1.8	74	0	0	0	212	0	22
2019/03/20	0.09	0.52	-184.52	-8.34	1.48	-0.34	0.89	-0.03	-2.5	5.4	60	0	0.02	5	197	0	3
2019/03/21	-0.01	-0.7	-53.93	30.65	1.45	10.82	-0.64	-0.01	8.5	1.4	71	-0.02	0.02	2	221	0	19
2019/03/22	0.1	-0.27	-185.79	-54.17	-3.09	2.69	-0.83	-0.07	15	-0.2	44	0	-0.03	-83	198	0	-60
2019/03/25	-0.31	0.27	-17.52	-2.35	-90.97	-61.12	0.18	0.03	-15.5	-3	49	0.02	-0.03	89	278	0	19
2019/03/26	0.06	0.61	72.83	20.1	-42.39	-45.93	0.76	-0.03	-3	3	72	-0.01	0.01	-12	233	0	36
2019/03/27	0.11	0.31	-0.44	-13.09	42.95	25.62	-0.14	-0.02	-0.5	-4.4	65	0.01	-0.02	25	208	0	-14
2019/03/28	-0.1	0.41	9.12	10.07	-14.99	-27.78	-0.01	-0.01	-1	1	76	0.02	0	-31	203	0	-47
2019/03/29	-0.17	-0.72	97.88	18.96	143.94	95.82	0.57	-0.05	2	-0.6	82	0	-0.01	-7	217	0	27
2019/04/01	0.7	0.38	154.42	32.79	101.59	79.6	0.62	0.03	18	15.2	74	-0.01	-0.02	20	244	0	-6
2019/04/02	-0.44	0.11	71.44	0.05	-2.64	6.46	0.36	-0.01	-11	-3.6	55	0	-0.01	-13	269	0	-1
2019/04/03	-0.04	1.16	202.5	6.16	50.87	39.48	-0.06	-0.02	10.5	9.6	50	0	0	12	198	0	14
2019/04/04	0.13	1.28	33.61	5.99	40.07	30.27	0.09	-0.03	-0.5	-0.4	70	-0.01	0.01	-17	273	0	-32
2019/04/08	-0.57	-0.12	-24.61	16.38	-5	-1.76	1.7	0.07	11	4.6	73	0.01	0	62	244	0	11
2019/04/09	-0.46	1.21	-112.83	-17.57	18.2	-5.15	-0.49	0	77.5	-2.4	42	-0.01	0.02	-32	257	0	19
2019/04/10	-0.07	0.59	55.34	10.01	10.42	2.27	1.12	-0.01	-14	1.8	42	0	0	0	255	0	0
2019/04/11	0.96	1.19	29.29	0.11	-88.27	-51.97	-0.9	-0.03	-9.5	0.6	52	0	0	-26	240	0	13
2019/04/12	2.83	-0.74	64.73	19.09	-8.96	-1.33	0.72	-0.02	5	4	56	0.01	0.01	-11	205	0	-20
2019/04/15	-2.75	0.23	20.35	-1.83	-13.1	-10.84	-0.37	-0.06	8.5	-3.8	68	-0.01	0.02	10	215	0	38
2019/04/16	0.8	0.19	81.04	1.48	110.27	75.81	0.54	-0.02	-6.5	2.4	52	0	-0.01	9	280	0	-13
2019/04/17	0.1	0.46	51.75	-6.61	1.45	9.52	-0.1	-0.06	5	-1.4	65	0	-0.01	-6	227	0	-10
2019/04/18	1.48	-0.57	69.32	4.58	-15.16	-12.92	0.35	-0.02	-6.5	-32.4	71	-0.02	-0.01	0	215	0	-25
2019/04/19	-2.46	0	4.37	1.47	48.53	20.6	1.04	0.02	18.5	0.4	68	0.01	-0.03	-10	236	0	-17
2019/04/22	0.23	0	4.38	1.47	-95	-55.76	1.03	0.02	-6	8.6	78	0	0.01	29	194	0	25
2019/04/23	0.91	0.64	4.37	25.71	-6.6	-16.45	0.47	-0.08	7	3.4	58	0.01	0.01	-10	243	0	-2
2019/04/24	-0.64	-0.12	77.65	-6.43	11.08	3.02	0.06	0.02	12.5	4.2	88	0.01	-0.01	-11	221	0	0
2019/04/25	-0.62	-0.12	-30.56	-1.08	-88.27	-77.78	-0.22	0.04	-5	-1.2	80	0.01	-0.03	12	233	0	-4
2019/04/26	1.32	-1.43	32.58	13.71	-52.55	-37.43	-2.2	0.07	2	3.8	51	0	-0.01	-2	214	0	8
2019/04/29	0.2	0.52	12.84	3.15	11.06	-23.9	-0.11	0.01	7.5	0.4	22	0	0	-14	184	0	10
2019/04/30	0.59	-0.1	16.06	2.8	12.88	15.84	0.76	-0.02	-2.5	8.8	57	0	0.03	-66	204	0	-20
2019/05/06	2.39	-0.95	-57.2	-13.36	-228.59	-171.88	-1.56	-0.05	10.5	-5.4	59	0	0	82	235	0	-5
2019/05/07	0.11	1.07	-194.14	-48.42	36.05	19.93	-1.36	0.02	10.5	-5.8	54	0.03	0.03	-5	234	0	18
2019/05/08	-0.01	0.5	87.19	-4.63	-53.21	-32.63	0.49	0.06	-5	-5.8	65	0	0	-58	212	0	8
2019/05/09	0.01	-0.4	-206.01	-8.7	-67.76	-42.81	0.02	0	-11	-0.8	68	0.01	0.02	117	223	0	-21
2019/05/10	0.96	-0.88	85.91	10.68	130.75	88.26	0.23	0.02	5	2.4	79	0.02	0.04	-13	187	0	-1
2019/05/13	-1.36	-0.59	-183.18	-69.53	-61.72	-35.5	-0.39	0	-11.5	6.4	116	0.01	0.01	-17	235	0	43
2019/05/14	0.4	0.86	114.97	22.54	-23.58	-20.1	1.01	0.03	-13.5	-4.2	116	0.04	0.05	13	191	0	3
2019/05/15	2.85	0.08	107.95	16.55	81.94	55.07	0.53	-0.04	33	-2.4	42	0.02	0.01	100	232	0	-9
2019/05/16	-0.02	-0.4	210.8	25.36	16.87	17.03	0.85	0.03	-1	1.2	59	0.01	0.01	-66	212	0	-5
2019/05/17	-1.15	-0.57	-71.43	-16.79	-95.2	-73.41	-0.41	-0.02	21	-4.4	56	0.02	-0.01	0	205	0	-48
2019/05/20	0.78	0.2	-197.65	-19.3	-30.97	-11.7	-0.24	0.05	-3	1.8	79	0.01	0.02	-50	205	0	22
2019/05/21	0.18	0.2	104.82	24.13	48.99	35.37	0.21	-0.05	16.5	-3.8	77	0	0	-12	200	0	-18
2019/05/22	0.08	0.98	22.63	-8.09	-17.4	-14.27	-1.19	-0.07	-16	-3	96	0	0	2	218	0	27
2019/05/23	1.23	-0.31	-216.33	-34.03	-65.42	-39.18	-3.23	0.03	4.5	1.6	103	0	-0.01	-2	200	0	-6
2019/05/24	-0.06	-0.59	58.63	3.82	9.95	0.47	0.93	0.02	26	-4.4	78	0	0.01	-2	208	0	-6
2019/05/27	1.78	0.11	8.01	-11.83	43.29	39.39	1.42	-0.01	-30	-4.2	66	-0.01	0.02	-15	235	0	-7
2019/05/28	2.22	-0.11	8	-11.84	35.06	17.53	0	-0.01	-5	0.4	63	0.01	-0.01	-5	189	0	27
2019/05/29	4.02	0.05	-189.24	-19.37	-8.35	4.79	-0.66	0.04	8.5	-4.8	51	0	-0.01	23	208	0	17
2019/05/30	2	-0.23	64.27	5.84	-22.73	-8.89	-2.58	-0.06	5	-1.4	50	0	-0.01	-24	185	0	-2
2019/05/31	4.69	-0.83	-175.24	-36.8	-11.39	-7.11	-2.38	-0.1	-10.5	-9.6	69	0	-0.02	17	188	0	-37
2019/06/03	0.84	-0.72	65.97	-7.61	2.22	-8.62	-3.21	-0.05	-17	4.8	68	-0.01	0.02	0	207	0	33
2019/06/04	1.42	0.82	178.36	58.82	-33.54	-27.8	0.69	0.01	11.5	3.4	77	-0.01	0.04	-7	238	0	14
2019/06/05	-3.13	-0.31	9.64	22.88	-1.36	-0.86	-1.34	-0.05	-2.5	-1.4	61	0.01	0.02	10	201	0	-9
2019/06/06	-5.07	-0.27	-27.67	17.34	-32.43	-33.62	1.04	-0.03	10.5	5.2	56	0	-0.01	-10	180	0	-32
2019/06/10	-4.56	1.22	102.29	43.24	46.06	24.33	0.62	0.02	26.5	5	79	0	0.05	-6	177	0	-10
2019/06/11	-4.11	-0.22	102.29	-1.01	108.54	73.59	0	0.04	22	6.8	66	0	0.01	2	211	0	15
2019/06/12	-3.2	-0.16	-43.41	-5.88	-28.18	-16.34	-2.32	-0.02	-38	-0.2	65	0	0	4	235	0	14
2019/06/13	-3.23	0.15	54.96	11.8	-5.71	1.36	1.34	-0.05	6	-4.4	64	0	-0.01	47	189	0	-19
2019/06/14	-1.9	0.09	-72.87	-4.66	-30.51	-28.77	0.7	0.06	-19	0	63	0	-0.01	-37	186	0	32
2019/06/17	2.54	-0.03	-10.58	2.69	-0.06	5.65	-1.07	-0.01	-2.5	2	28	0	-0.03	3	180	0	-41
2019/06/18	3.12	0.09	245.93	28.08	12.8	2.54	1.2	-0.05	5.5	6.4	26	0	-0.01	7	178	0	4
2019/06/19	3.43	-0.16	-23.22	8.71	48.32	27.64	-0.32	-0.05	4	-1.2	36	0	-0.02	8	210	0	-2
2019/06/20	-2.95	0.14	46.86	27.72	112.58	69.32	2.63	-0.07	5.5	4.4	37	-0.01	0.01	-9	190	0	19
2019/06/21	1.75	0.21	-15.47	-3.72	5.42	14.86	0.75	-0.01	-5	3.8	53	-0.03	-0.01	84	175	0	-31
2019/06/24	0.45	1.07	-65.35	-5.11	7.33	6.17	-0.34	0.1	-17.5	1.8	69	0	0.06	-75	219	0	6
2019/06/25	-0.03	0.06	-46.13	-27.97	-39.96	-26.08	0.19	-0.02	5.5	-1	85	0.01	0.03	-14	205	0	-13
2019/06/26	0.66	0.98	16.88	-3.6	-6.98	-5.79	1.44	-0.01	-3	-9.8	85	0.01	-0.01	7	193	0	11
2019/06/27	-0.89	-0.5	25.71	11.14	40.49	20.51	0.06	0.05	-3.5	1.2	83	0.01	0.01	-19	190	0	19
2019/06/28	1.75	-0.61	127.77	16.84	-9.23	-17.91	0	0	17.5	7	56	-0.01	0	6	195	0	-20
2019/07/01	-0.72	0.63	122.58	22.57	110.22	66.02	-1.49	-0.05	11.5	-5	67	0	-0.01	-12	192	0	24
2019/07/02	0.47	-0.19	5.34	8.68	1.36	-0.96	-2.66	-0.03	-4	1	97	-0.02	-0.08	19	181	0	-21
2019/07/03	1.19	-0.21	89.52	22.81	-43.64	-28.68	1.42	0.05	-26	-10.8	88	0.01	0.02	0	183	0	13
2019/07/04	-0.41	-0.5	13.66	-2.7	-20.43	-10.01	-0.52	0.05	2	-3.6	59	0.01	0	-11	161	0	-19
2019/07/05	0.09	0.37	-61.37	-2.71	20.1	5.81	0.93	0.06	-8	4.4	61	0	0	7	200	0	7
2019/07/08	-0.55	0.43	-25.02	-14.46	-90.41	-77.7	-0.12	0	6	-3.4	56.2	0.02	-0.02	9	191	0	-4
2019/07/09	2.3	-0.25	-106.96	3.68	-9.66	-5.13	0.05	0.03	10	-3.4	51.4	0	-0.01	-9	223	0	16
2019/07/10	-0.2	1.63	-63.14	13.44	-6.39	-12.93	2.85	0.02	-11	-1.2	46.6	0	-0.01	-17	279	0	2
2019/07/11	0.16	0.11	-41.29	6.84	-1.52	2.46	-0.49	-0.04	21	1.4	41.8	-0.02	0.02	13	319	0	-14
2019/07/12	-1.28	0.5	-8.8	13.86	23.51	12.79	0.2	0.05	2.5	-1.2	37	0	0	-9	188	0	-9
2019/07/15	0.21	0.26	64.02	0.53	15.46	11.64	-0.24	-0.06	1.5	-1	49	0	0.01	-56	203	0	42
2019/07/16	-0.07	-0.58	43.63	-10.26	-17.35	-4.57	-2.13	-0.08	22.5	3	43	0	0	59	208	0	-8
2019/07/17	-0.24	-0.01	-89.94	-19.62	-2.2	-5.93	-0.69	-0.01	-7	-7.4	52	0.01	-0.02	25	222	0	-23
2019/07/18	-0.27	-0.69	-113.18	10.69	-36.24	-30.51	-1.73	-0.02	1.5	3	33	0	0	-11	206	0	10
2019/07/19	0.13	1.11	32.22	-18.5	39.56	23.02	0.54	-0.04	3	6.4	35	-0.02	0.01	-4	177	0	15
2019/07/22	-0.04	0.1	29.33	8.42	-26.28	-37.23	0.79	0.07	-22.5	0.2	51	0.02	-0.02	7	206	0	-34
2019/07/23	-0.6	0.82	201.34	20.44	8.23	12.97	0.57	-0.03	-2	6.8	39	0	0	-7	200	0	19
2019/07/24	0.25	-0.62	32.15	14.09	29.92	23.34	-0.65	-0.06	15.5	0.2	36	0.01	-0.03	-78	186	0	-13
2019/07/25	0.36	-0.17	-160.79	-15.89	31.24	14.08	0.21	0.01	0	-0.8	40	-0.02	-0.02	11	169	0	17
2019/07/26	-0.36	-0.73	57.8	22.19	7.5	7.18	0.07	-0.09	-7	-1.4	40	0.01	0.01	54	173	0	9
2019/07/29	0.01	0.13	-2.43	-4.89	-4.3	-3.53	0.25	-0.03	-9	0.4	43.4	0	-0.01	2	184	0	3
2019/07/30	-0.21	-0.51	-270.23	-7.79	16.05	11.33	1.01	0.02	4.5	-4	46.9	0.01	0.01	20	175	0	14
2019/07/31	1.96	0.08	41.8	-32.8	-34.96	-19.83	0.45	0.1	2	0.4	50.3	-0.01	0.01	-13	184	0	-17
2019/08/01	-2.06	1.47	64.11	-26.82	-31.89	-23.74	-4.67	-0.07	-8	-4.4	53.7	0.01	-0.04	-3	185	0	41
2019/08/02	-0.53	-0.19	-380.71	-21.51	-56.03	-40.93	1.39	-0.03	10	-2.8	57.1	0.01	0	-69	155	0	-87
2019/08/05	0.01	-0.56	-213.93	-87.31	-71.75	-46.34	-2.08	-0.05	-1	-3.6	60.6	0.02	0.04	127	140	0	14
2019/08/06	-0.56	-0.29	-90.55	37.03	-39.36	-43.94	-0.87	0.01	5.5	1	64	0.05	0.15	-53	168	0	22
2019/08/07	0.48	-0.13	82.19	2.21	-14.9	-8.88	-2.71	-0.01	-10.5	0.4	57	0.03	0.02	-11	186	0	0
2019/08/08	-0.02	0.26	195.26	54.11	47.86	25.87	1.15	0.03	15.5	-0.8	52	0	0.01	4	150	0	17
2019/08/09	-0.14	-0.41	-151.61	-19.44	-35.76	-19.8	1.15	0.01	5	-3.2	57	0.01	-0.01	-16	150	0	-26
2019/08/12	-1.59	-1.42	-14.12	-35.56	65.57	40.24	0.04	-0.02	-7	4	59.3	0.01	0.03	22	149	0	6
2019/08/13	-0.98	0.4	70.45	43.23	-33.35	-17.73	2.73	0.05	5	-5.2	61.5	0.01	0.01	-71	150	0	-5
2019/08/14	-1.98	-0.19	-257.47	-85.72	16.65	11.65	-1.82	0	-19	5.8	63.8	0	-0.01	76	159	0	-6
2019/08/15	0.24	-0.92	-79.99	7	11.6	6.89	-1.25	0.06	-3.5	1.6	66	0	-0.05	-2	169	0	-21
2019/08/16	-0.92	0	150.07	41.08	16.54	8.02	0.41	-0.02	-63	3.2	68.3	0	-0.02	-17	150	0	-3
2019/08/19	0.9	0.58	152.63	34.97	80.55	59.28	1.1	0	10	-1	70.5	0.01	0	8	181	0	10
2019/08/20	0.04	-0.31	43.74	-23.14	-3.36	-3.1	0.29	0.02	-0.5	2.2	72.8	0.01	0	5	165	0	3
2019/08/21	1.62	-0.23	43.74	23.92	-5.97	0.33	0.27	-0.05	-12.5	-1.8	75	-0.01	0.01	-66	182	0	18
2019/08/22	1.31	-0.36	-55.81	-1.48	11.75	3.11	-0.38	-0.02	8.5	3.8	67	0.01	0	-14	171	0	-6
2019/08/23	-0.15	-0.57	-135.53	-75.84	27.35	13.99	-0.58	0.01	-5.5	-1.2	76	0.01	0.01	0	149	0	-9
2019/08/26	-1.16	0.74	46.53	31.27	-54.95	-33.86	-0.64	0.07	-27.5	0.8	47	0	0.03	70	179	0	-10
2019/08/27	0.12	-0.42	71.98	-9.22	51.04	38.62	0.81	-0.03	-2.5	3.6	42	0.02	0.02	39	180	0	36
2019/08/28	-0.35	0.6	-29	18.78	-14.37	-8.43	0.98	0.03	6.5	-9.2	26	0	0.01	-48	179	0	-19
2019/08/29	-0.37	0.45	137.86	36.64	-12.39	-2.84	0.59	0.06	-14.5	-2	35.7	0.01	0	8	166	0	19
2019/08/30	0	-0.14	100.4	1.88	9.4	-4.68	-0.65	-0.01	17.5	4.4	45.3	0	-0.02	-6	153	0	-18
2019/09/02	0.36	-1.13	14.5	-10.09	48.73	37.87	-1.77	0.04	7.5	1.2	55	0	-0.05	-63	214	0	32
2019/09/03	-0.15	0.04	-42.92	-10.1	5.29	6.04	-0.4	0.03	-6.5	-0.4	42	0	-0.01	57	177	0	29
2019/09/04	0.11	0.3	114.18	31.51	32.39	27.26	2.44	0.09	10	6	48	0	-0.01	22	170	0	-30
2019/09/05	-0.6	0.01	101.74	38.22	39.32	28.45	0.25	0	8.5	2	57	0	0.03	-81	178	0	-23
2019/09/06	-0.98	-0.45	64.95	2.71	23.19	13.74	0.59	0.05	-4.5	1.4	49	0	0.01	61	151	0	-13
2019/09/09	0.58	-0.07	34.37	-0.28	24.44	25.14	1.05	0.12	20.5	-1.6	81	0	-0.02	12	174	0	-8
2019/09/10	-0.39	1.71	42.61	0.96	-13.68	-3.54	-0.21	-0.03	-6	-1.6	76	-0.01	0.02	4	187	0	-4
2019/09/11	-0.85	-0.45	90.36	21.54	-29.17	-12.39	-1.57	-0.03	12.5	0.6	76	0	0	-6	180	0	28
2019/09/12	0.34	0.16	51.18	8.64	42.28	22.43	-0.43	0.03	8	-9.4	83	0	-0.02	4	172	0	-17
2019/09/16	-0.01	0.59	-29.94	-11.61	-14.66	-0.49	8.64	0.11	-0.5	1	49	-0.01	0.01	7	182	0	21
2019/09/17	-0.03	-0.82	-7.7	7.74	-66.5	-52.63	-4.47	-0.03	-11.5	2.2	46	0	-0.05	21	225	0	-6
2019/09/18	-0.58	-0.76	17.01	1.03	18.86	7.54	-0.95	-0.02	-12	-1	48	0	0.05	-22	229	0	7
2019/09/19	0.28	0.5	68.08	0.06	14.3	13.62	0.8	-0.09	-15	-1.8	64	0	-0.02	11	214	0	-11
2019/09/20	-0.57	0.57	10.31	-14.72	11.27	7.17	-0.12	-0.01	-23	-5.6	43	0	0.01	-13	226	0	-11
2019/09/23	0.52	-0.73	-125.68	-0.29	-44.99	-29.37	0.49	-0.01	4	-3.4	51	0	-0.02	40	227	0	31
2019/09/24	0.28	-0.26	-35.18	-25.18	10.42	8.26	-1.67	-0.03	-54.5	-0.8	59	0	0	78	220	0	10
2019/09/25	0.09	-0.33	-72.97	18.27	-30.1	-29.91	-0.71	0.01	10.5	4	68	0	-0.01	-44	219	0	-5
2019/09/26	-0.02	0.43	54.36	-7.25	-29.84	-26.34	0.35	-0.06	-3	-2.6	76	0	-0.01	-59	183	0	-28
2019/09/27	-0.1	-0.33	92.4	-15.83	11.51	3.08	-0.83	-0.05	-17	-5.6	66	0	-0.03	-12	183	0	18
2019/09/30	-0.24	-0.57	47.14	14.95	-38.12	-26.98	-1.13	-0.07	8	2.2	75	0	0	-10	167	0	-61
2019/10/08	0.81	-2.19	-457.88	-83.68	23.15	8.38	-2.54	-0.04	16	-3	22	0	0.03	22	185	0	40
2019/10/09	-1.29	0.12	124.06	26.34	5.56	11.29	0.08	-0.05	-9	-0.4	36	0	-0.01	2	193	0	3
2019/10/10	0.3	0.61	69.94	18.73	31.4	22.85	0.78	-0.03	2.5	0.2	60	0	0.02	12	171	0	19
2019/10/11	-0.31	1.18	347.45	32.14	37.09	25.95	1.41	0.01	-3.5	-1.4	32	0	0.01	8	166	0	5
2019/10/14	0.83	-0.29	-25.09	-4.12	41.51	34.22	-1.16	0.06	-17	-3.8	54	0	0	-16	240	0	15
2019/10/15	-0.17	1.56	143.23	29.53	-16.99	-16.83	-0.61	0.06	9	-2.8	45	0	-0.01	-23	229	0	-24
2019/10/16	0.2	0.59	40.32	-5.99	-13.56	-12.34	0.68	-0.05	-25	-2	33	0	0.02	11	199	0	18
2019/10/17	-0.02	-0.24	-15.16	8.26	2.53	-1.38	0.49	0.03	19.5	1.4	45	0.01	0.03	18	229	0	-6
2019/10/18	0.26	-0.19	-21.35	-11.75	-55.84	-39.19	-0.49	0.04	3	0.4	48	-0.01	0.02	-35	186	0	-21
2019/10/21	-0.24	0.05	114.36	20.52	11.46	1.48	-0.46	-0.12	-3	0	69	0	0.02	-8	240	0	21
2019/10/22	-0.68	-0.27	6.73	-10.73	15.04	14.76	0.74	0.04	3.5	0	60	0	0	3	210	0	0
2019/10/23	0.15	-0.9	43.5	8.53	-24.8	-12.76	1.47	0	12	-2	45	0.01	-0.01	-1	261	0	13
2019/10/24	0	0.69	73.91	5.77	-0.41	-0.7	0.5	0.05	4.5	-1.4	50	-0.01	0	-59	214	0	-2
2019/10/25	-0.25	-0.48	22.41	12.26	26.12	14.01	0.35	-0.01	1	4.6	43	0	-0.01	100	193	0	-46
2019/10/28	-1.16	0.15	47.2	16.87	29.8	25.12	-0.45	0.24	-9.5	2.4	49	0.01	-0.02	13	261	0	39
2019/10/29	-0.54	0.33	-2.09	-2.53	-16.36	-25.87	0.02	0.07	11	-6.2	73	-0.02	0	-44	229	0	-45
2019/10/30	-0.43	0.55	-29.39	9.88	-19	-14.86	-0.98	0.06	1.5	0.4	95	0	0	25	247	0	43
2019/10/31	-0.01	-0.39	-43.44	-9.21	-4.48	-10.26	-0.38	-0.05	-24.5	-13	94	-0.01	0.03	-17	233	0	17
2019/11/01	0.89	-0.32	94.26	29.35	65.64	29.14	1.46	0.06	1	-1.6	86	-0.01	-0.02	23	214	0	-6
2019/11/04	-0.35	0.34	175.23	11.36	25.73	17.29	0.44	0.12	-12.5	3	103	0	0	-8	220	0	-15
2019/11/05	-1	-0.12	12.22	-3.65	24.69	16.07	0.83	0.05	23	1	85	0	-0.02	-11	270	0	22
2019/11/06	-0.91	-0.72	31.39	2.16	-17.93	-12.96	-1.22	-0.04	-13.5	-2.4	69	-0.03	-0.07	-15	247	0	-23
2019/11/07	0.95	0.15	109.57	8.4	6.99	0.11	0.55	-0.04	5	0.6	67	-0.01	-0.01	40	225	0	-3
2019/11/08	-0.65	-0.1	-60.9	7.9	-18.86	-14.53	0.22	0	1	8.4	74	-0.01	-0.02	-29	203	0	-8
2019/11/11	-0.83	0.09	-30.19	-6.07	-70.03	-54.21	-0.33	-0.15	-15.5	-2.8	77	0	-0.02	-1	222	0	-9
2019/11/12	0.71	-0.81	85.14	4.83	0.71	4.85	-0.12	-0.02	5	0.8	66	0.01	0.01	30	279	0	66
2019/11/13	1.92	0.27	-53.44	2.2	-3.71	-9.58	0.31	0.05	0	6.4	54	0	-0.01	-7	214	0	-16
2019/11/14	-0.93	-0.43	-49.84	2.59	5.88	4.63	-0.09	-0.03	9	-1	51	0.01	0	-3	259	0	31
2019/11/15	-1.76	-0.11	61.52	23.83	-28.77	-18.53	1.02	0.04	-10	-2	60	0	0.02	5	182	0	-32
2019/11/18	0.49	-0.46	-34.74	1.57	30.84	17.86	-0.86	-0.14	0	-2.6	55	-0.01	0.01	-11	222	0	16
2019/11/19	-1.07	0.05	14.11	-1.85	39.11	24.79	-1.53	-0.03	30	1.2	72	0	0.02	-7	205	0	-24
2019/11/20	-2.46	0.59	-62.98	-11.72	-39.18	-22.94	1.49	0.05	7.5	-0.2	68	0.01	0.01	37	257	0	28
2019/11/21	0.7	-0.09	-20.44	-4.92	-18.26	-7.41	1.57	0.07	-8.5	3.2	79	0.01	0.01	-30	229	0	-28
2019/11/22	-0.19	0.64	26.18	6.75	-39.61	-18.35	-0.58	0.07	-8	-1.2	93	0.01	0	18	207	0	18
2019/11/25	-0.27	-0.14	82.57	23.35	28.22	20.88	0.26	-0.12	9.5	1.2	26	0.01	-0.02	-33	231	0	-45
2019/11/26	0	-0.05	-10.03	6.88	13.44	0.89	0.62	-0.05	-28.5	-3.8	36	-0.01	-0.01	16	235	0	21
2019/11/27	-0.15	0.73	50.65	13.11	-16.03	-3.87	-0.21	-0.04	0	-5.8	25	0	0	-3	296	0	23
2019/11/28	-0.2	-0.1	-41.49	-6.32	-13.32	-13.5	-0.19	-0.09	-6	0.2	90	0	-0.02	-8	242	0	-33
2019/11/29	-0.21	0.21	-9.2	-6.33	-33.63	-17.71	-1.44	-0.09	2.5	7.6	55	0	0.01	15	172	0	-13
2019/12/02	0.42	-0.89	-271.7	-27.11	7.39	3.83	-1.51	0.03	10.5	0.2	86	0	0	-3	228	0	27
2019/12/03	0.05	-0.33	24.61	-20.67	15.03	8.89	-0.1	0.1	1	-2.4	82	-0.01	0.04	22	188	0	-20
2019/12/04	-0.19	0.74	151.28	19.56	-1.27	-6.58	2.18	-0.03	-9.5	0.4	87	0.02	0.01	-32	246	0	-3
2019/12/05	0.15	-0.05	-85.77	4.67	29.54	21.35	0.39	0.01	6	1.6	65	0.01	0.02	21	229	0	17
2019/12/06	0.04	0.25	111.78	28.48	23.03	12.54	1	-0.07	1	-0.8	130	-0.01	0.01	-22	191	0	-2
2019/12/09	0.09	0.19	-60.97	-9.95	-6.94	2.47	-0.14	-0.1	7.5	-8.2	85	0	-0.03	0	210	0	61
2019/12/10	1.03	-0.19	-34.89	-3.44	4.93	2.84	0.09	0.01	-1.5	-5.6	104	0	0	37	203	0	-22
2019/12/11	0.81	-0.46	76.02	9.11	2.37	7.1	-0.62	-0.01	-6.5	-3.4	108	0	0.02	-28	223	0	-35
2019/12/12	0.08	0.59	74.9	26.94	-11.73	-8.72	0.48	0.09	-2.5	-0.6	88	-0.01	0.01	9	211	0	-20
2019/12/13	0.07	-1.05	61.08	0.23	77.2	51.98	1.02	-0.03	0	1.4	135	-0.01	0.03	-4	189	0	3
2019/12/16	0.01	0.84	124.94	22.65	19.33	16.71	0.12	0.04	11.5	7.6	77	-0.03	-0.07	6	184	0	-28
2019/12/17	0.03	1.08	-119.83	1.07	54.25	38.03	0.76	-0.03	0	-2	67	0.01	0.01	12	196	0	35
2019/12/18	-0.15	0.52	-65.67	-1.38	-9.02	-5.38	0.07	-0.03	-70.5	2.8	86	0	0.01	0	196	0	-13
2019/12/19	-0.38	0.27	-10.2	14.23	-5.63	0.03	0.37	0	10.5	2.2	47	0	-0.02	-38	184	0	-5
2019/12/20	0.29	-0.18	106.94	15.85	-9.9	-12.13	-0.4	0.04	-0.5	4.6	64	0	0.01	0	150	0	37
2019/12/23	-0.09	-0.13	-17.92	2.79	-50.15	-42.19	0.25	-0.13	-15.5	2.6	61	0.01	-0.02	20	175	0	-50
2019/12/24	0.11	-0.46	0	-0.63	25.86	19.93	0.81	0	-18	-0.2	101	0	0.01	-16	184	0	-10
2019/12/25	-0.11	0	12.04	8.27	-2.09	-0.8	0.36	0.04	1	-1.8	57	0	-0.01	11	173	0	38
2019/12/26	-0.29	0	12.05	8.26	35.12	25.47	0.36	0.03	-9.5	-2.2	96	-0.03	-0.02	-10	190	0	-19
2019/12/27	0.27	0.62	12.04	0.11	-3.96	-2.31	0.24	-0.02	5	2.6	96	0.01	0.01	18	161	0	-12
2019/12/30	0.88	-1.62	-88.1	-18.73	59.6	34.98	0.31	-0.06	8	4.6	114	-0.01	0.05	-16	173	0	-9
2019/12/31	-1.2	-0.45	0	9.49	14.95	10.1	-2.47	-0.01	9.5	-0.4	105	0	0.01	-78	195	0	-20
2020/01/02	1.3	-0.25	136.92	27.07	55.66	35.08	0.25	-0.05	12	-0.2	104	-0.02	-0.01	69	169	0	7
2020/01/03	-1.03	0.62	-166.79	-23	-7.28	-1.41	2.35	-0.02	2	-4.4	130	0.01	-0.02	-7	155	0	-22
2020/01/06	1.87	-0.75	-92.15	11.43	-15.66	-0.38	0.31	0.04	-0.5	0.6	28	0	-0.01	28	185	0	63
2020/01/07	-1.77	0.32	99.84	-9.1	30.93	21.39	-0.64	0	13.5	1	27	0	0.02	-6	208	0	-28
2020/01/08	1.1	-0.48	93.35	15.87	-47.91	-37.91	-2.83	0	15	4.4	54	-0.02	-0.05	-5	177	0	16
2020/01/09	-0.25	0.61	174.88	21.65	52.05	27.99	-0.07	0.02	-4	-1.6	25	0	-0.03	3	178	0	-8
2020/01/10	-0.04	-0.46	-11.75	-9.35	-1.19	-2.59	-0.39	0.04	5.5	0.8	41	-0.01	-0.02	3	145	0	-38
2020/01/13	-0.38	-0.06	-31.79	22.78	40.81	23.28	-0.78	-0.02	1	-3.2	65	-0.01	0	-10	155	0	12
2020/01/14	0.39	-0.29	4.97	-4.98	-14.1	-8.75	0.29	-0.01	3	2.6	143	-0.03	-0.02	-6	158	0	4
2020/01/15	-0.41	0.66	-24.19	6.14	-23.16	-16.78	-0.49	-0.06	-1	-6.2	123	-0.02	-0.02	1	175	0	2
2020/01/16	1.85	0.34	-2.87	27.52	-17.69	-15.96	0.62	-0.04	13.5	-0.2	81	0	0.01	4	164	0	-22
2020/01/17	-1.8	0.59	96.7	12.81	5.81	1.42	0.23	-0.08	-4.5	0.6	61	0.01	0	7	146	0	2
2020/01/20	1.28	-0.28	22.81	-4.41	30.98	20.29	0.35	-0.05	8	-0.6	122	-0.02	-0.05	-24	148	0	-18
2020/01/21	-0.37	-0.23	6.93	-4.42	-71.52	-43.65	-0.61	-0.05	-1.5	-4.4	120	-0.01	-0.01	6	125	0	1
2020/01/22	-0.89	0.09	-40.12	0.96	17.62	8.61	-1.38	0.01	-6.5	0.8	99	0.03	0.02	-61	141	0	-5
2020/01/23	-0.17	-0.31	-127.33	3.79	-128.03	-84.22	-1.17	0	-6.5	-0.6	108	0	0.01	52	69	0	-1
2020/03/23	-1.75	-9.18	-4647.27	-1088.14	-473.59	-316.36	-35.01	-0.32	30	-30	65	0.2	-0.06	71	204	0	163
2020/03/24	0.2	1.25	1004.1	209.93	94.8	62.27	0.12	0.09	27.5	6.8	56	0.01	0.06	3	189	0	-29
2020/03/25	-0.28	0.71	129.01	28.23	97.41	59.15	0.24	0.04	-10.5	-2	45	-0.03	0	-38	259	0	-29
2020/03/26	1.87	-0.19	126.7	154.51	-24.47	-16.68	-1.05	-0.02	-10	0.8	39	0	0.06	11	162	0	-38
2020/03/27	-1.79	-0.96	-368.44	-88.6	12.01	7.29	-1.41	-0.03	3.5	-6.2	19	-0.03	0.07	-21	160	0	-4
2020/03/30	-0.09	0.67	183.45	85.18	-35.95	-24.99	-2.17	0.03	-12	-14	22	0	0.06	-5	169	0	21
2020/03/31	0.46	0.63	119.87	-42.06	12.05	3.09	-0.02	-0.06	18.5	-2	35	0.05	-0.02	1	201	0	-28
2020/04/01	-0.07	-0.6	-391.09	-114.09	-11.08	-15.78	2	-0.05	-17	-7	40	-0.01	0	5	167	0	21
2020/04/02	-0.2	0.99	26.07	56.4	59.45	46.12	5	-0.04	-124.5	14.8	51	0.02	-0.04	-11	150	0	-15
2020/04/03	0.02	-0.09	-45.05	-38.25	-21.31	-16.65	4.37	0.11	-44	-8.6	65	0.01	-0.06	-68	155	0	-7
2020/04/07	-0.3	2.55	830.93	170.76	84.8	56.77	-2.24	0.25	13	1.4	58	-0.02	-0.05	71	162	0	36
2020/04/08	0.54	0.63	-23.81	90.57	-17.68	-5.39	0.97	-0.12	8.5	-5	57	-0.04	0.02	3	170	0	6
2020/04/09	-0.83	-0.06	231.85	39.84	12.47	10.53	-1.36	-0.04	7	-0.4	59	0	-0.02	-11	176	0	-17
2020/04/10	-0.63	0	0	-14.09	-23.63	-29.27	0.13	-0.01	27.5	4.6	69	-0.01	0.03	7	162	0	-23
2020/04/13	2.11	0	65.91	-14.1	-15.92	-13.58	0.13	-0.01	1	-11.4	46	-0.01	0	-11	173	0	32
2020/04/14	-0.63	-1.25	65.91	84.43	72.44	44.23	-2.14	-0.1	-1.5	-8.2	51	0.01	-0.01	15	186	0	-48
2020/04/15	0.53	-0.56	-416.8	-62.7	-28.34	-16.11	-1.91	-0.04	-6.5	14.2	48	0	0.05	-1	164	0	55
2020/04/16	1.26	1.68	21.78	16.19	5.02	8.77	0.13	0.1	13	-1	62	0.03	-0.02	-10	164	0	-20
2020/04/17	-1.27	0.76	324.24	75.01	37.11	18.55	0.26	0.07	-0.5	5.6	75	0	-0.03	9	140	0	-6
2020/04/20	-0.64	-0.32	50.12	-51.4	13.97	14.06	-2.51	0.18	-4.5	1.2	56	0	0	0	141	0	11
2020/04/21	1.04	-1.52	-426.05	-86.6	-45.41	-25.54	-6.24	-0.11	-24	-3.6	46	0.01	0	-61	163	0	-12
2020/04/22	-0.65	0.8	165.18	62.75	31.33	16.97	1.04	0.08	9	-6.8	56	0.01	0.02	73	171	0	-28
2020/04/23	-0.31	0.37	98.76	-1.51	-9.63	-5.48	0.96	0.04	-16.5	3.2	63	0	-0.03	-69	204	0	37
2020/04/24	-0.37	-0.28	-177.7	38.94	-32.78	-29.97	0.11	-0.08	-7.5	0.8	50	-0.01	-0.04	60	190	0	-9
2020/04/27	0.02	-0.46	323.9	41.74	25.8	6.96	-1.45	0.05	-18	-5.6	58	-0.01	0.02	22	165	0	36
2020/04/28	2	-0.06	135.64	-15.09	26.38	-5.47	0.47	0.03	-39.5	0.4	57	0	0.01	-8	200	0	-12
2020/04/29	-1.81	-0.02	312.11	76.12	17.88	12.42	2.08	-0.07	4	4	72	0	0	-18	182	0	0
2020/04/30	0.16	-0.62	-246.1	-27.08	45.55	37.64	2.73	0.06	29.5	7.6	70	-0.01	0.01	7	159	0	-55
2020/05/06	-0.43	-0.57	-255.44	-64.01	23.67	18.06	4.45	0.01	12	1	49	0.01	-0.01	4	150	0	42
2020/05/07	0.45	0.54	153.07	32.77	-11.36	-6.62	-0.26	-0.05	7.5	0	51	0.02	-0.01	-14	154	0	29
2020/05/08	-0.57	-0.19	145.21	48.61	38.73	23.82	1.51	-0.07	1.5	5.6	32	-0.01	0.02	0	173	0	-30
2020/05/11	0.11	-0.29	-79.49	0.52	-3.44	-0.54	-1.34	0.02	-9.5	3.4	65	0	0	1	202	0	15
2020/05/12	-0.11	-0.54	-5.49	-60.2	0.06	-3.24	0.35	-0.15	34	8.8	65	0.01	-0.01	-2	233	0	-11
2020/05/13	0.1	0.14	-276.84	-50.12	8.01	6.49	-0.79	-0.06	-1.5	1.4	77	0	0.03	17	211	0	29
2020/05/14	0.12	0.17	-205.64	32.5	-43.03	-27.71	1.94	0.03	14	6.4	74	0	-0.01	-4	234	0	5
2020/05/15	0.13	0.33	128.15	11.2	-12.4	-1.88	1.37	-0.03	-2.5	-4	75	0	-0.01	14	243	0	-4
2020/05/18	0.34	1.17	593.7	90.21	10.09	6.96	2.31	0.13	14.5	9.2	65	0.01	0.02	1	194	0	-37
2020/05/19	-0.29	-0.36	16.42	-30.97	33.34	23.16	-0.16	0.03	31.5	8.2	72	-0.01	0.05	-11	189	0	5
2020/05/20	0.51	1.29	148.42	48.67	-21.03	-14.84	1.1	-0.02	-10.5	7	70	0.01	0.02	22	166	0	-4
2020/05/21	-0.51	-0.07	-157.78	-23.1	-21.43	-15.82	0.31	-0.06	5	-10.6	50	-0.01	0.02	-18	187	0	19
2020/05/22	-0.09	0.21	7.94	6.94	-89.73	-54.15	-0.93	0.17	-15	-1.4	64	0	-0.01	-7	167	0	-44
2020/05/25	-0.46	0.21	317.41	18.16	5.26	4.2	0.4	0.02	3.5	1.6	53	0.03	0	0	185	0	35
2020/05/26	-0.18	-0.01	113.37	18.16	43.45	28.58	0.64	0.02	2.5	-6.8	48	0.01	0	26	178	0	25
2020/05/27	0.24	-0.27	153.04	44.36	-27.16	-9.75	-1.43	-0.05	7.5	-7.4	62	-0.02	0.04	3	174	0	22
2020/05/28	0	-0.07	123.44	-6.4	11.02	9.42	0.55	-0.06	-4.5	6.2	64	0.02	0.04	-21	156	0	-18
2020/05/29	0	0.14	-194.28	14.58	10.39	6.13	0.04	0.02	3	-0.4	61	0	0.05	4	157	0	-59
2020/06/01	-0.09	-0.43	0	11.42	104.32	63.08	2.99	-0.06	8	-0.6	58	0	0.03	-11	157	0	22
2020/06/02	-0.13	1.1	434.43	25.09	12.23	5.97	1.25	-0.01	7	0.8	46	-0.01	-0.01	11	163	0	14
2020/06/03	1.67	0.01	466.08	42.05	0.08	1.97	0.22	0.04	-3	-5.2	41	-0.01	0.03	-2	181	0	-17
2020/06/04	-2.01	0.13	-56.8	-10.52	-1.46	-4.12	0.2	0.01	4	-5.4	40	-0.01	0.02	-16	162	0	26
2020/06/05	0.46	1.03	417.12	81.58	19.06	11.55	2.31	-0.02	-9	16.4	42	0	0.08	32	184	0	-6
2020/06/08	-0.09	-0.52	-28.09	38.46	20.7	6.97	-1.5	0.01	23.5	10.2	46	-0.01	-0.03	-28	182	0	-6
2020/06/09	0.09	-0.23	-201.6	-25.21	25.08	18.34	0.38	-0.05	-0.5	-0.2	37	-0.02	-0.04	16	182	0	-4
2020/06/10	-0.19	0.43	-87.83	-17.04	-7.32	-12.36	0.55	0.03	-6.5	2.2	39	0	0.04	-7	166	0	-4
2020/06/11	0.07	-0.64	-559.87	-188.04	-43.83	-22.85	-3.18	0.03	0	3.6	36	-0.01	0.01	-28	164	0	-18
2020/06/12	-0.06	-0.28	-21.01	39.21	7.2	-1.16	0.18	-0.07	2	-5	35	0.03	-0.03	9	145	0	31
2020/06/15	-0.11	0.17	-37.93	25.28	-48.09	-29.71	0.99	-0.08	-25	-6.8	36	0	-0.03	11	165	0	-34
2020/06/16	-0.02	0.62	404.31	58.15	59.58	41.72	1.24	-0.06	23	0	32	-0.01	0.05	2	173	0	2
2020/06/17	0	-0.03	66.48	-11.25	3.02	4.12	-0.25	0.03	-14	3.2	29	0.01	-0.04	46	174	0	23
2020/06/18	-0.13	1.71	-100.61	1.85	26.79	3.45	0.8	0	19	3.4	23	0	-0.01	-21	152	0	18
2020/06/19	0.01	-0.31	49.23	-17.6	54.33	28.31	0.68	0.03	0	1.4	36	0	-0.02	-29	137	0	-44
2020/06/22	-0.01	0.37	-67.79	20.12	3.34	-2.36	0.89	-0.01	-14	-0.2	23	0	-0.03	52	144	0	7
2020/06/23	0.12	0.89	260.79	13.43	19.74	5.35	-0.45	0.03	13.5	-3.8	21	-0.02	0.04	-20	150	0	43
2020/06/24	0.39	-0.02	-429.82	-80.96	17.2	8.93	-2.32	-0.03	0	0.4	40	-0.01	0.02	-13	145	0	-42
2020/06/29	-0.16	1.22	138.18	2.91	-29.27	-18.03	1.4	0.03	-17.5	0.6	21	0.02	-0.03	8	154	0	7
2020/06/30	0.01	0.36	78.81	47.05	54.24	23.15	-0.56	0.07	8	10.2	35	0	0.01	-21	149	0	37
2020/07/01	1.28	0.74	-50.36	15.57	83.82	41.31	0.88	-0.06	-7.5	7.6	47	-0.01	-0.02	-2	167	0	25
2020/07/02	0.1	-0.34	347.89	14.15	88.06	64.59	1.11	0.03	20	0.4	43	-0.01	0	21	173	0	-18
2020/07/03	1.51	0.54	-80.28	0	83.76	62.24	-0.34	0.02	-1	3	28	0	0	1	152	0	-4
2020/07/06	-0.1	1.79	205.27	49.71	250.49	180.07	0.3	0.08	-1.5	-6.4	17	0.01	0.01	-12	159	0	-22
2020/07/07	-0.21	-0.32	-116.65	-34.4	28.04	12.46	-0.02	0.05	-4	2	23	-0.04	0	14	164	0	-7
2020/07/08	-0.12	-0.07	-121.99	24.62	75.87	58.1	0.21	-0.06	10	-0.8	19	-0.01	-0.03	10	158	0	12
2020/07/09	-0.15	-0.71	-5.35	-17.89	66.77	47.15	-0.94	-0.05	21.5	-2.4	42	-0.01	0.02	-11	160	0	7
2020/07/10	-0.32	0.42	144.25	32.99	-87.64	-67.27	0.89	0.05	-21	0.4	57	-0.02	-0.05	-23	180	0	19
2020/07/13	0.71	0.31	166.26	-29.82	99.83	59.97	-0.52	-0.09	12	4	25	0.01	0.02	3	190	0	-21
2020/07/14	-0.12	0.29	-102.61	42.3	-46.27	-28.67	0.18	0.01	-11	1.6	32	0	0.03	11	196	0	-30
2020/07/15	0.02	-0.81	233.62	29.04	-62.22	-53.32	0.89	0.04	-2.5	-3.4	20	0	0.04	-1	203	0	4
2020/07/16	0	-2.23	-56.01	-10.99	-228.22	-151.2	-0.42	-0.05	6.5	-0.4	35	-0.01	0	-17	189	0	6
2020/07/17	-0.01	1.22	44.64	9.16	28.45	4.03	-0.23	-0.02	8.5	-3.8	49	0.01	-0.01	-1	175	0	8
2020/07/20	0.01	-1.65	127.31	27.11	135.6	100.02	0.14	-0.07	-3	-4.6	74	-0.01	0.03	1	174	0	9
2020/07/21	0.07	0.45	124.91	5.46	10.74	6.74	1.04	0.03	26	2.2	55	0	0	534	181	0	17
2020/07/22	0	0.01	-67.58	18.72	23.41	12.27	-0.03	0.02	-11	-6	43	-0.02	0.04	664	192	0	25
2020/07/23	0.02	0.7	-0.86	-40.36	-2.01	-8.05	-0.98	0.09	6.5	8.4	42	0.02	0.04	-880	169	0	-66
2020/07/24	0.05	-0.96	-265.33	-20.03	-206.85	-128.34	0.03	0.08	8	2.8	49	0	0.03	-228	169	0	-1
2020/07/27	-0.01	-1.36	0.6	23.78	22.86	8.46	0.07	-0.07	-13	-7.6	21	0.01	0.04	-33	190	0	33
2020/07/28	-0.04	0.74	-3.38	-20.97	39.81	22.73	-0.19	0.07	-9	6.6	27	-0.01	0.07	31	199	0	-38
2020/07/29	0.08	0.46	-13.02	40	110.75	66.59	0.53	0.06	6	-1.6	45	0.01	-0.02	-19	189	0	-22
2020/07/30	0	-0.64	-442.61	-12.22	-22.86	-7.73	-0.81	-0.08	-14.5	-1.4	45	-0.01	0.04	19	201	0	45
2020/07/31	-0.08	0.73	-66.29	24.9	38.9	23.19	0.36	-0.02	13	-3.2	42	-0.01	0.05	-56	177	0	-30
2020/08/03	0	-0.16	333.62	23.49	76.26	57.96	0.85	0.28	8	4.2	42.5	0.02	-0.05	-1	198	0	3
2020/08/04	0.05	0.71	-46.11	11.9	4.49	3.72	0.28	0.08	-20	-5.8	43.1	-0.02	-0.03	4	190	0	1
2020/08/05	0	-0.06	59.38	21.26	1.31	5.87	0.74	0.03	4	2.6	43.6	0	0.02	-5	169	0	-18
2020/08/06	-0.05	-0.38	-68.57	21.39	-14.35	8.9	-0.08	-0.05	8	4.8	44.2	-0.04	0.01	20	182	0	38
2020/08/07	0	0.03	83.2	2.12	-54.83	-32.42	-0.69	0.08	-3	-6.6	44.7	0	0	-29	181	0	-30
2020/08/10	0.04	0.3	12.65	9.19	16.94	25.21	0.59	-0.07	-6	-0.4	45.3	0.02	-0.03	1	191	0	8
2020/08/11	-0.07	-0.52	259.36	-26.78	-43.09	-38.96	-0.49	-0.02	-14.5	9.6	45.8	0.01	-0.03	-1	197	0	5
2020/08/12	0.1	-0.22	111.74	46.66	-34.14	-21.02	0.93	0	1.5	5.8	46.4	-0.01	-0.01	-20	196	0	24
2020/08/13	-0.02	-0.54	-64.92	-6.92	-11.93	1.46	-0.47	0.04	-12	8	46.9	-0.02	0.02	17	197	0	-24
2020/08/14	0	0.04	-92.37	-0.58	68.92	39.37	-0.16	0.16	8.5	-4.8	47.5	0	0.01	1	174	0	2
2020/08/17	-0.05	0.84	19.32	9.14	110.6	78.7	0.57	-0.01	0	1	48	0	0.02	-15	185	0	6
2020/08/18	1.19	0.25	-38.9	7.79	-2.47	12.29	0.09	0.07	10.5	1	48.5	-0.01	0.01	0	203	0	-11
2020/08/19	0.46	-0.31	95.57	-14.93	-72.08	-42.96	-0.09	0.02	-19.5	-7.4	49.1	-0.01	0.03	6	165	0	34
2020/08/20	-0.1	-0.32	-147.33	10.66	-61.53	-44.23	-0.47	-0.07	15.5	5.4	49.6	0.01	-0.05	1	167	0	-27
2020/08/21	0.24	-0.26	-44.2	11.65	39.69	16.78	-0.55	0.08	-2	-4.2	50.2	-0.02	-0.01	-8	174	0	-34
2020/08/24	-0.39	1.83	280.74	34.12	37.01	4.96	0.78	0.07	19.5	-7.6	50.7	0.01	-0.03	-1	154	0	-3
2020/08/25	-0.02	1.14	-4.92	12.34	6.1	-12.06	0.73	0.07	0.5	-0.2	51.3	0	-0.01	12	172	0	14
2020/08/26	-0.08	0.01	128.53	35.11	-55.82	-43.84	-0.22	-0.05	-0.5	2.6	51.8	-0.01	0.02	-11	199	0	15
2020/08/27	-0.09	-0.25	-93.79	5.82	25.22	20.37	-0.55	0.17	5.5	10	52.4	-0.02	-0.03	31	221	0	12
2020/08/28	-0.01	1.15	-63.16	23.46	112.92	53.7	-0.04	-0.05	7.5	5.6	52.9	0	-0.01	-17	201	0	-14
2020/08/31	0	-0.86	-87.82	-7.7	-28.05	-8.13	0.23	-0.02	8.5	0.4	53.5	-0.03	0.02	4	196	0	-7
2020/09/01	0	-0.92	28.87	26.34	25.9	14.93	0.3	-0.11	24	-0.8	54	-0.01	0.02	-2	184	0	16
2020/09/02	-0.05	0.49	269.18	54.19	1.77	-5.81	-1.15	-0.03	12.5	3.2	59	-0.01	-0.03	10	223	0	-9
2020/09/03	0	0.51	-185.66	-125.78	-26.79	-19.82	-0.36	-0.01	7.5	-2	61	-0.01	-0.06	-14	194	0	0
2020/09/04	-0.01	-1.38	-215.11	-28.1	-46.88	-29.61	-1.41	0.1	-2	2.4	56	0.01	0.01	54	185	0	-12
2020/09/07	0.02	-0.3	257.62	-47.56	-100.85	-62.78	-0.65	-0.11	4.5	3.2	60	0	0	-20	201	0	26
2020/09/08	0.03	-0.26	-131.95	-47.56	25.02	23.83	-2.23	-0.11	-23	4.6	69	0	-0.02	-38	188	0	26
2020/09/09	0.1	0.41	268.88	67.12	-109.8	-61.79	1.01	0.03	-4.5	-0.6	75	0	-0.03	-1	229	0	-20
2020/09/10	-0.33	1.21	-34.79	-59.77	-2.61	-19.81	-0.73	-0.08	-12	8.4	38	-0.01	0.02	-1	197	0	-4
2020/09/11	0.52	-0.16	0.42	1.78	45.3	25.53	-0.23	-0.06	10.5	-8.2	38	0.01	0.02	1	175	0	-15
2020/09/14	-0.16	2.2	-9.18	42.57	23.77	18.46	-0.22	0.05	6	5.2	46	0	0	-8	211	0	50
2020/09/15	-0.12	-0.68	24.01	17.66	37.43	16.87	0.92	0.06	-7.5	7.8	25	-0.02	0.01	19	235	0	8
2020/09/16	-0.49	0.2	37.7	-15.71	-31.12	-11.76	1.69	-0.11	-8.5	3.2	26	-0.04	-0.07	163	210	0	2
2020/09/17	0.47	-1.55	-47.25	-28.48	-24.65	-13.48	1.08	-0.26	13	-6.8	30	-0.01	-0.04	-138	201	0	-62
2020/09/18	0.02	-0.44	-91.87	-37.54	104.38	67.65	-0.15	0.07	17	3	42	-0.01	0.02	-9	173	0	1
2020/09/21	0	-1.59	-573.81	-38.41	-45.66	-21.15	-1.71	-0.18	-7.5	2.4	22	0	0	9	184	0	29
2020/09/22	0.09	1.45	51.95	34.51	-55.67	-42.64	0.28	-0.03	2	-2.8	22	0.03	-0.03	110	227	0	37
2020/09/23	0.1	-1.35	48.58	-78.65	16.57	5.41	0.05	0.97	0	6.4	41	0.01	-0.03	1525	246	0	-7
2020/09/24	0.04	0.29	-36.4	9.67	-89.26	-56.53	0.17	0.04	-13	2.6	67	0	-0.02	-51	219	0	1
2020/09/25	0.07	-0.62	-137.37	51.87	6.95	-3.76	-0.02	-0.06	-14.5	6.6	71	0.01	0.02	45	197	0	-20
2020/09/28	0.11	1.54	401.67	53.14	11.89	-1.89	0.51	-0.03	20.5	9.4	66	0.02	-0.01	-605	275	0	35
2020/09/29	0.19	-0.93	-45.05	-16.13	9.89	6.83	-1.4	-0.27	12	7.2	55	-0.01	0.02	5	199	0	-35
2020/09/30	-0.71	0.15	-65.09	27.53	-4.4	-6.31	-0.08	0.05	-5	-14.6	55	-0.01	0.03	680	201	0	-41
2020/10/09	-1.52	-1.2	290.5	114.13	93.74	54.03	1.9	0.21	49.5	0	51	-0.03	0	-520	199	0	69
2020/10/12	1.61	0.16	87.18	57.09	142.02	86.39	-1.13	0.08	22.5	12	64	-0.07	-0.07	-300	252	0	11
2020/10/13	-0.06	-0.66	-119.42	-22.29	16.04	1.28	0.73	-0.08	6.5	-16.6	70	0.02	0.02	121	237	0	26
2020/10/14	0.07	0.54	9.07	-23.26	-32.1	-18.97	0.87	-0.11	-0.5	-2.4	58	0.02	-0.02	611	237	0	-58
2020/10/15	0.31	-0.79	-324.31	-5.33	-8.36	-8.6	-0.16	0.13	-7	-4.8	29	-0.01	-0.01	-53	243	0	8
2020/10/16	-0.5	-0.07	205.24	0.47	-7.06	4.18	-0.23	-0.09	-7.5	-24.8	21	-0.01	-0.03	-288	229	0	-16
2020/10/19	0.1	0.09	-54.33	-56.89	-36.19	-23.69	-0.31	0.14	-7.5	6.4	60	-0.03	-0.03	-271	259	0	26
2020/10/20	0.2	-0.57	-117.71	16.2	37.98	15.43	0.54	0.07	20.5	-7.8	71	-0.01	0.03	-165	263	0	20
2020/10/21	0.02	-0.84	-179.31	-7.56	-0.64	-3.08	-1.43	0.13	1	-3.2	40	-0.01	0.02	-50	226	0	-26
2020/10/22	-0.15	0.61	-14.58	17.93	-14.85	-12.52	0.73	-0.05	6	0.6	66	-0.02	-0.01	148	252	0	-11
2020/10/23	0.03	1.31	102.69	11.9	-59.49	-34.5	-0.69	-0.04	-8.5	-0.6	95	0.01	-0.01	-214	248	0	17
2020/10/26	0	-1.64	-468.57	-64.42	-27.25	-26.88	-1.31	0.09	-3	4.4	84	0	0.02	338	278	0	23
2020/10/27	-0.01	0.21	-113.61	-10.29	8.04	3.2	0.74	0	4.5	4.6	76	0.03	0.01	196	252	0	-52
2020/10/28	-0.07	-1.03	-503.06	-119.65	37.99	14.92	-2.08	0.01	-8	0.4	80	0.02	0	-13	273	0	25
2020/10/29	0.48	0.63	37.56	39.08	35.65	3.49	-1.47	0.18	17.5	6.6	77	0.01	-0.01	100	281	0	50
2020/10/30	0.25	0.04	-41.59	-40.15	-77.59	-48.2	-0.19	0.17	-2	6	76	-0.01	-0.05	-96	234	0	19
2020/11/02	-0.24	-0.03	227.62	40.28	25.5	0.59	1.51	-0.15	10	13.4	67	-0.01	-0.04	-186	346	0	-5
2020/11/03	0.14	0.71	304.88	58.92	56.73	45.95	0.74	-0.18	-29.5	-7.8	65	-0.01	-0.02	160	328	0	-55
2020/11/04	-0.16	0.73	235.24	74.28	36.1	6.37	1.52	0	-25.5	1.6	56	-0.02	0.05	-417	300	0	-6
2020/11/05	-0.17	0.87	243.87	67.01	71.45	42.69	-0.3	-0.13	-4	2.8	65	0.01	0.01	98	317	0	27
2020/11/06	0.46	-0.56	-88.07	-1.01	0.61	-7.97	-1.48	-0.04	-2.5	-2.8	67	-0.06	-0.02	-135	281	0	-27
2020/11/09	-0.12	1.13	615.95	41.06	95.63	61.57	2.95	-0.03	7	-9.6	81	-0.02	0.03	278	328	0	74
2020/11/10	-0.17	-0.32	67.14	-4.97	-27.47	-13.58	1.21	0.1	-3	7.4	90	-0.02	-0.07	-13	300	0	-66
2020/11/11	-0.66	-0.1	53.07	27.13	-48.98	-17.95	0.19	0.08	46.5	6.8	61	0.02	0.02	-155	257	0	41
2020/11/12	0.27	-0.21	-163.23	-35.65	3.56	-3.52	-0.27	-0.09	14.5	-5.4	68	0.01	-0.01	165	262	0	-6
2020/11/13	-0.31	0.36	23.77	48.14	-51.61	-28.58	-0.75	0.03	0	11.8	72	0.01	0.03	80	248	0	-53
2020/11/16	-0.19	1.11	61.89	41.76	47.32	36.87	1.04	-0.3	-37	4.2	73	-0.03	-0.01	-160	276	0	68
2020/11/17	-0.04	-0.75	-5.14	-17.38	-9.38	-7.07	-0.07	0.01	-15	5.4	65	-0.02	-0.02	351	303	0	-13
2020/11/18	-0.06	0.55	68.42	-41.74	-3.12	7.4	0.59	0.02	4.5	-12	38	-0.02	-0.02	293	269	0	11
2020/11/19	-0.41	-0.84	-115.73	14.08	36.32	15.79	-0.14	-0.11	-9.5	-3.4	35	-0.01	-0.02	-159	290	0	-36
2020/11/20	0	0.39	51.09	-24.33	15.3	14.64	0.76	0.05	9.5	-5.2	56	0.03	0.05	-309	270	0	3
2020/11/23	-0.47	0.51	-10.28	20.05	61.74	36.76	1.1	0.17	43	3.4	35	-0.01	-0.01	515	295	0	37
2020/11/24	-0.26	0.38	165.47	57.82	-30.74	-11.67	1.8	0.07	41	8.6	26	0.01	-0.01	-31	279	0	-14
2020/11/25	0.53	-0.01	-2.64	-5.76	-63.59	-40.49	0.75	0.06	19	11.4	22	-0.01	0.03	-88	344	0	-19
2020/11/26	0.25	0.48	-3.23	4.35	8.89	7.4	-0.81	-0.05	1.5	11	48	0.01	0.02	-5	553	0	17
2020/11/27	0.08	0.03	49.11	4.35	61.18	38.58	0.38	-0.05	5.5	12.4	93	0	-0.01	-273	414	0	-3
2020/11/30	-0.63	1	-44.52	-16.72	-20.52	-16.55	-0.59	0.09	-7.5	10.6	76	0	0.04	-27	373	0	74
2020/12/01	-0.47	-0.27	91.14	40.82	106.85	60.18	-0.17	-0.06	50	15.4	92	0.01	0	-28	368	0	-56
2020/12/02	0.67	0.69	-69.06	6.56	0.04	-2.56	0.83	-0.13	61	24	65	-0.03	0.05	59	365	0	18
2020/12/03	0.01	-0.55	-60.38	-2.29	-10.08	-7.24	0.46	-0.24	-13.5	-16.6	106	0	0.02	265	324	0	-24
2020/12/04	0.07	1.11	46.1	32.4	8.86	2.44	0.54	0.05	-1.5	14	88	-0.01	0.02	-14	284	0	-40
2020/12/07	0.08	-0.49	-27.96	-7.16	-43.68	-27.98	-0.46	-0.13	10.5	-3	63	-0.01	-0.04	-39	335	0	20
2020/12/08	-0.07	-0.05	7.49	10.29	-12.36	-6.42	0.05	0.01	-6.5	9.2	108	-0.01	-0.01	-22	345	0	13
2020/12/09	-0.13	0.13	61.77	-29.43	-67.18	-38.22	0.02	-0.01	95.5	25	112	0	0	80	365	0	10
2020/12/10	-0.08	1.2	-44.53	-4.72	-2.18	1.32	1.39	0.14	-17.5	24.8	107	0.02	0	-20	284	0	-21
2020/12/11	0.13	-0.38	-181.43	-4.64	-50.89	-26.09	0.02	0.03	-80.5	-8	142	-0.01	0.03	243	316	0	3
2020/12/14	0.05	0.29	108.86	-15.97	45.21	21.93	0.02	0.06	-16	-14.4	42	0	-0.01	783	341	0	75
2020/12/15	0	1.21	139.71	47.13	10.26	-1.89	0.47	0.01	6.5	-61.6	52	0	0.02	-886	339	0	-39
2020/12/16	0.08	-0.39	203.11	6.55	8.77	-0.25	0.32	0.01	45.5	2.2	64	0	-0.01	-1	351	0	56
2020/12/17	-0.33	0.18	101.27	21.31	63.61	37.89	0.42	-0.02	10	19	78	0	0.03	6	318	0	-14
2020/12/18	0.28	-0.86	-36.74	-13.07	-17.51	-9.97	0.76	0.05	45.5	17.6	87	-0.01	0.04	182	336	0	15
2020/12/21	-0.51	-0.19	-384.21	-14.49	46.87	25.67	-1.35	-0.01	70	3.4	124	0.02	-0.01	2403	570	2134	12
2020/12/22	0.22	0.25	171.81	-7.66	-82.07	-63.79	-0.83	0.06	-67.5	-38.4	120	-0.01	0	-678	600	-478	26
2020/12/23	-1.25	0.76	169.12	2.75	42.35	25.54	1.12	-0.15	11.5	6.4	117	0.02	-0.02	-514	699	-672	-44
2020/12/24	1.24	0.27	0	13.05	-7.1	-19.21	0.09	-0.07	-1	-10.4	131	-0.02	-0.01	-452	729	-45	-15
2020/12/25	0.36	0.63	101.53	16.15	41.99	33.45	-0.21	-0.09	63	20	125	-0.01	-0.01	-206	717	-140	-60
2020/12/28	0.05	0.62	101.53	16.15	22.4	0.73	-0.22	-0.1	23.5	1.4	183	-0.01	0	-220	593	-7	39
2020/12/29	0.26	-0.42	-28.91	-8.32	-21.47	-18.25	0.23	0.1	-51.5	-22.8	84	0.03	0.04	-270	427	-8	13
2020/12/30	0.13	-0.82	-42.6	5	70.77	35.41	0.25	-0.02	-20.5	3.8	47	-0.02	0.01	-123	382	-81	8
2020/12/31	-0.29	0.52	0	24.03	97.58	58.62	0.46	0.1	-11.5	3.2	34	-0.01	0.02	262	340	-152	-128
2021/01/04	0.37	0.99	7.96	-55.42	56.43	29.89	-0.71	0.05	59	-2.6	149	0.02	-0.02	864	533	392	76
2021/01/05	-0.01	-0.72	-75.59	26.21	100.78	25.72	2.51	0.09	21.5	17.8	203	-0.06	-0.08	-278	871	-128	50
2021/01/06	-0.01	0.67	240.82	21.28	49.17	22.2	0.7	0.02	-11.5	-5	124	-0.02	0.01	17	921	6	10
2021/01/07	-0.02	1.13	76.27	55.65	95.99	25.32	0.08	-0.05	31.5	23.2	68	0	0.03	-89	740	11	-33
2021/01/08	-0.12	0.16	81.29	20.89	-18.23	-6.09	1.61	0.02	42.5	-3	52	0.01	-0.03	-569	577	-176	-24
2021/01/11	-0.4	-0.38	-112.87	-25.07	-54.27	-38.61	-0.33	0.07	9.5	12	63	0.01	-0.04	162	636	132	59
2021/01/12	0.18	0.12	-11.6	1.58	155.19	76.84	0.92	-0.03	-47	3	80	0	-0.02	-95	666	-52	-58
2021/01/13	0	-1	14.65	8.65	-18.38	-9.69	-0.52	0	-83	-13	78	-0.02	0	94	620	100	45
2021/01/14	0.01	-0.12	48.99	-14.3	-107.51	-32.75	0.36	-0.06	14.5	-4.2	96	0.01	-0.01	-167	576	53	-49
2021/01/15	0.47	-1.78	-200.97	-27.29	-12.38	0.48	-1.32	0.07	61	25	116	-0.01	-0.02	-140	475	-85	9
2021/01/18	0.38	-0.11	60.62	15.33	60.44	29.84	-0.35	-0.09	-20	-10	73	0.02	-0.02	111	522	192	8
2021/01/19	-0.01	1.46	-33.29	15.33	-81	-29.84	1.15	-0.09	-49.5	-35.6	79	0.01	0.01	-59	482	-89	-3
2021/01/20	-0.65	-0.17	106.31	52.94	38.91	16.71	0.18	0	-27.5	-8.6	84	-0.01	0.03	-145	507	-1	-22
2021/01/21	0.68	1.2	-14.7	1.22	88.54	38.17	0.02	-0.02	23.5	-5.6	117	-0.01	-0.03	8	478	-96	24
2021/01/22	-0.77	0.13	-32.7	-11.6	4.81	-14.51	-0.69	-0.05	-30.5	-16.6	119	-0.01	0.02	-14	534	33	-3
2021/01/25	0.39	-1.07	-230.02	13.89	56.14	17.49	0.47	0.14	8.5	0.4	109	0.02	0.02	754	757	188	2
2021/01/26	0.38	0.2	227.04	-5.74	-112.95	-54.81	0.03	0.04	-50	-0.8	161	0	-0.01	-57	641	-2	15
2021/01/27	2.8	-0.07	-250.53	-98.85	15.03	3.91	-0.1	0.04	20	6	137	-0.01	-0.01	-191	561	-37	17
2021/01/28	-2.7	0.67	45.47	36.61	-150.86	-68.16	-0.28	0.01	-36	-6.2	105	0.01	-0.02	-159	685	65	-26
2021/01/29	-0.03	-1	-233.06	-73.14	-25.18	-22.11	0.35	-0.12	-55.5	-18	100	-0.01	0	-231	868	-116	1
2021/02/01	2.06	-0.07	189.15	59.62	65.69	22.21	0.47	0.25	-10.5	-0.2	76	-0.01	-0.01	595	908	326	-19
2021/02/02	-1.05	2.12	213.14	52.45	83.44	28.4	1.11	0.02	-34	-20.2	77	0.01	-0.02	-258	691	-125	7
2021/02/03	-0.24	2.45	98.47	3.86	-15.89	-16.37	1	-0.06	-13	-3.4	99	0	-0.02	16	721	-68	17
2021/02/04	-0.04	-0.16	126.66	41.57	-11.25	-15.45	0.38	0.18	57	4.8	101	-0.01	-0.01	-386	654	-128	6
2021/02/05	-2.44	0.93	-3.57	15.09	9.46	-5.53	0.5	-0.09	3.5	-3.8	75	0.01	-0.04	-38	605	-50	-9
2021/02/08	1.77	0.41	3.19	28.76	81.15	36.12	1.22	0.02	15	0.8	83	0	0.05	-112	435	-199	-103
2021/02/09	0.45	-0.35	-48.11	-4.36	121.69	71.04	0.53	-0.07	25.5	9.2	62	-0.02	-0.01	-11	380	-68	33
2021/02/10	-0.09	1.07	-78.83	-1.35	121.47	51.6	0.38	0.16	-6.5	11	81	-0.01	0.02	-318	293	-250	-80
2021/02/18	2.93	-1	-46.04	4.09	-39.34	20.27	2.46	-0.04	61.5	-28.4	71	0.01	-0.03	616	434	380	132
2021/02/19	1.93	-0.91	106.3	-7.26	10.46	20.81	-1.02	0.05	-41	1.8	58	0.01	0.05	153	492	103	2
2021/02/22	0.71	0.55	-43.19	-30.21	-181.51	-53.73	2.33	-0.05	-62.5	-2	81	0	0	912	539	210	67
2021/02/23	1.64	0.69	-85.23	4.87	-17.66	-6.08	0.13	-0.05	-43.5	3.2	96	-0.01	0.03	200	629	102	-30
2021/02/24	-0.02	0.48	111.19	44.06	-142.1	-72.28	1.67	-0.06	21.5	5.2	56	0.01	0	119	531	-124	-9
2021/02/26	-6.54	-1.86	-189.71	-114.28	-100.81	-55	-0.91	-0.02	-9	-1.4	29	0.01	0.02	-291	496	-91	-16
2021/03/01	-0.01	-0.16	226.53	90.67	82.02	42.32	-2.44	0.01	-72	22.6	17	0.01	-0.04	4797	885	400	36
2021/03/02	2.85	1.22	26.98	-31.53	-69.15	-42.81	-0.99	0.06	88	8.4	38	-0.02	-0.04	8239	1728	391	48
2021/03/03	1.43	-0.88	40.23	-50.57	102.58	68.31	1.37	-0.04	34.5	5.8	57	0	0.01	232	1354	4	-3
2021/03/04	-1.58	0.69	-23.69	-51.25	-171.5	-73.41	2.67	-0.06	-21.5	9.2	56	0.02	0	-2736	1190	1	2
2021/03/05	-2.69	0.86	-135.65	73.47	-17.91	-1.5	2.62	-0.05	-21.5	-24	46	0.01	-0.04	-3198	990	33	4
2021/03/08	0.83	0.11	460.22	-20.59	-182.78	-80.58	-1.12	-0.03	28	20.2	91	-0.01	-0.04	34	994	-76	-13
2021/03/09	-0.86	1.51	57.03	54.09	-109.02	-62.12	-0.72	-0.02	-42.5	-3	58	0.05	0.02	-1625	1624	87	71
2021/03/10	1.08	0.89	102.31	23.37	32.61	-1.55	0.38	0.04	49.5	-21.6	47	-0.02	0.01	4088	1820	25	48
2021/03/11	2.37	0.38	29.14	40.53	124.61	79.09	1.73	-0.01	27	14.4	35	-0.01	0	5935	2777	41	56
2021/03/12	1.54	0.92	-67	4	18.16	16.25	-0.41	-0.07	-38.5	5	49	-0.02	0.02	2586	2917	13	-33
2021/03/15	-1.31	-0.48	-40.97	25.6	-110.84	-33.13	-0.34	-0.1	-19.5	-12.4	69	0.02	0	-5352	1786	1870	180
2021/03/16	0.42	-0.82	96.16	-6.23	43.82	26.78	-0.49	0.06	52	10	67	0	-0.02	8985	1874	5998	130
2021/03/17	-3.41	1.39	39.03	11.41	21.5	-1.18	-0.39	-0.05	65	32.8	103	0	-0.02	-7569	1800	-5878	-24
2021/03/18	2.69	-0.58	178.91	-58.66	40.91	17.52	-4.72	-0.03	-15	-4.8	47	-0.01	0.04	-2883	1803	-1065	89
2021/03/19	0.31	-0.44	-154.52	-2.36	-134.68	-58.41	1.25	0.06	10.5	0.4	30	0.02	-0.01	377	1610	-315	-136
2021/03/22	-1.66	0.88	36.21	27.49	50.06	38.78	0.09	0.03	-50.5	4.6	71	0.01	-0.01	9572	1780	861	134
2021/03/23	3.08	-1.4	4.81	-30.07	-47.9	-31.93	-3.83	-0.05	0.5	4.4	76	-0.02	0.01	-4722	1686	-240	-24
2021/03/24	-3.17	0.17	-51.63	-21.38	-80.56	-44.45	3.62	0	-8.5	11.4	69	0.02	-0.03	-4545	1720	-552	67
2021/03/25	-0.99	-1.23	10.97	20.38	-2.34	-3.47	-2.46	0.06	9.5	3.6	74	0.01	-0.02	-2783	1613	-304	723
2021/03/26	0.8	1.37	127.58	65.02	111.64	54.74	2.62	0	11	2.2	65	0.01	-0.01	-1560	1176	-7	-440
2021/03/29	-1.45	0.12	68.78	-3.45	8.89	16.97	0.41	0.02	85.5	33.8	72	0	0.01	-432	1204	-277	-382
2021/03/30	-0.53	0.2	190.89	-12.54	47.85	21.38	-0.84	-0.02	2.5	7	104	0.02	0.01	864	1533	667	-172
2021/03/31	-0.85	0.5	-0.27	14.34	-46.37	-14.77	-0.6	-0.02	11	-8.8	43	0.01	-0.02	-2257	1317	-682	-37
2021/04/01	0.1	-0.08	98.83	46.98	62.42	24.42	1.32	0.03	-68	4.2	22	-0.01	-0.01	-598	1178	-85	-70
2021/04/02	0.21	0.88	0	27.03	50.78	18.06	-1.06	-0.11	-21	6.2	21	0	0.04	-1448	1128	-41	-5
2021/04/06	-0.49	0.89	105.51	27.04	-21.22	-1.42	-1.06	-0.06	24	-5.6	57	-0.01	0.01	1105	1369	59	836
2021/04/07	0.99	-0.37	-36.32	6.01	-36.6	-3.34	0.42	0.05	-9	-45	48	-0.01	0.02	161	1224	10	-464
2021/04/08	2.61	-0.39	26.32	17.22	8.47	2.92	0.04	0.01	-28.5	-0.4	49	0.01	0.01	-140	1145	7	100
2021/04/09	1.65	0.18	31.48	31.63	-76.87	-31.87	-0.25	0	16.5	-12.6	59	-0.01	0.02	-1249	1028	-37	-115
2021/04/12	-3.36	0.83	-19.16	-0.81	-87.59	-37.73	0.33	0.04	26	32.4	58	0.02	0.01	1481	1130	75	933
2021/04/13	-1.76	-0.63	19.36	13.6	-8.11	-16.48	0.39	0.06	3	18.8	75	-0.01	0	-1049	1067	-22	-284
2021/04/14	0.76	-0.03	-25.21	-16.93	40.99	20.25	2.91	0	1	11.4	73	-0.01	0.01	-362	1036	-55	-377
2021/04/15	1	0.35	46.18	45.76	-31.66	-17.73	0.36	0.04	-2.5	15	72	-0.01	0.01	1953	1001	86	-245
2021/04/16	-0.48	0.25	204.42	15.05	17.21	27.63	-0.17	0.03	139.5	6.8	90	0	-0.01	-211	970	-36	-140
2021/04/19	-0.62	-0.06	-91.36	-22.21	120.84	50.93	0.28	0.05	-9	26.8	69	-0.01	0	167	1344	77	19
2021/04/20	-0.04	0.54	-238.88	-28.32	-3.65	-4.61	-0.48	-0.02	8.5	-5.8	77	-0.01	0.03	346	1326	-78	-89
2021/04/21	0.74	1.01	66.46	38.48	15.37	-0.01	-1.25	-0.02	-29	-60.2	59	-0.01	-0.01	-95	1333	-5	-1
2021/04/22	-1.35	1.18	124.55	-38.44	-9.5	-7.82	0.08	0.05	41.5	28.2	29	-0.01	-0.02	2202	1384	1617	106
2021/04/23	0.79	-0.14	-40.9	45.19	46.21	9.06	0.71	0.05	-7.5	-4.8	33	0	-0.01	14813	1580	21319	29
2021/04/26	0.12	0.25	16.72	7.45	-58.21	-33	-0.46	0.07	44.5	-6.8	45	0	0.05	-18154	1287	-22417	-143
2021/04/27	0.08	0.09	-47.07	-0.9	13.28	1.44	0.77	0.07	-5	1.4	55	0	-0.01	-234	1222	-232	107
2021/04/28	0.06	0.49	42.91	-3.54	28.72	14.46	0.85	0.01	-27	18	71	0	0	-633	1173	246	215
2021/04/29	-0.81	0.22	-137.98	28.29	44.93	17.83	1.29	-0.04	9.5	27.6	64	-0.02	0.01	-625	1463	-406	-333
2021/04/30	0.91	0.82	-18.29	-30.3	-40.68	-28.04	-1.31	0.03	6.5	3	56	0	-0.01	-870	1372	-13	-161
2021/05/06	0.99	1.09	60.83	20.45	-62.37	-5.58	0.84	-0.01	139	61.2	56.2	0.02	-0.05	1540	1636	58	119
2021/05/07	-0.49	0.51	202.91	30.98	-65.07	-22.41	0.19	0.04	27.5	13.6	56.3	-0.02	0.01	725	1544	501	26
2021/05/10	1.84	1.77	0.76	-44.17	-3.63	9.12	0.04	-0.05	122.5	28.6	56.5	-0.03	0.04	-228	1432	-604	242
2021/05/11	-2.17	0.81	-280.66	-36.33	30.64	13.86	0.23	0.03	-34.5	8.2	56.6	-0.01	-0.05	-343	1543	-36	-87
2021/05/12	-0.21	2.26	30.47	-89.06	21.49	20.9	0.77	0.03	84	43.6	56.8	0	0.01	-619	1535	-67	-119
2021/05/13	-0.08	-0.82	49.46	49.46	-51.58	-33.21	-2.27	-0.01	-123.5	-60.8	56.9	0.03	0	94	1648	-1	825
2021/05/14	1.14	2.14	216.96	61.35	117.62	60.84	1.66	0	-66	-35.2	57.1	-0.01	-0.01	-390	1532	-45	-622
2021/05/17	-1.03	-0.34	-20.02	-10.56	74.4	27.24	0.75	0.15	45	-14.6	57.3	-0.02	0.02	-49	1624	58	-119
2021/05/18	-0.22	-3.25	-10.04	-35.46	2.61	11.39	-0.75	-0.11	0.5	8.6	57.4	0.01	0.01	252	1561	14	-3
2021/05/19	1.72	-3.35	-273.02	-12.15	-15.33	-18.05	-2.05	-0.05	-40.5	9	57.6	-0.01	0.03	1441	1738	127	39
2021/05/20	-1.45	3.03	256.7	43.44	14.14	-4.02	-1.55	-0.01	-144.5	-71.4	57.7	0.02	0	-391	1811	-115	-103
2021/05/21	0.3	-0.93	67.25	-3.26	-52.26	-20.38	1.33	0.02	-81.5	-66.4	57.9	-0.02	0.01	367	1767	-2	164
2021/05/24	0.19	1.03	0	41.19	21.44	10.72	2.02	-0.01	22	13.6	58.1	0.01	-0.01	814	1842	-50	390
2021/05/25	-0.16	0.56	27.58	-8.92	162.89	84.06	0.19	0.03	35	5.2	58.2	-0.01	0	-1894	1783	13	-382
2021/05/26	-0.36	0.35	-14.37	7.86	2.11	12.02	0.22	0.03	-13.5	-5.8	58.4	-0.02	0	559	1828	30	-8
2021/05/27	0.14	-1.83	-43.99	4.89	17.64	15.49	0.59	-0.06	43	18.4	58.5	-0.01	-0.04	430	1786	6	-15
2021/05/28	-0.09	-0.81	113.25	3.23	-17.14	-8.07	0.17	0.05	13.5	6.6	58.7	-0.01	-0.03	-411	1803	315	-124
2021/05/31	2.98	0.67	-98.85	-1.03	10.48	14.7	-0.31	0.03	-34	24.2	58.8	-0.02	-0.02	-351	1748	-61	-106
2021/06/01	-2.06	0.7	146.23	-1.04	10.11	9.23	0.93	0.05	105	29.2	59	-0.01	0.01	-1088	1686	-214	6
2021/06/02	-0.7	-1	35.35	6.08	-51.71	-27.57	1.1	-0.02	-13	14	67	0.02	0.02	254	1794	-49	71
2021/06/03	0.55	-1.15	-62.96	-15.27	-34.68	-12.93	-0.04	0	19.5	17	41	0	0	137	1769	89	86
2021/06/04	-0.05	-0.27	153.15	37.04	26.99	7.63	0.58	0.03	-28.5	-45.4	40	0.03	-0.02	181	1780	132	-47
2021/06/07	-0.62	1.48	-15.75	-3.37	-4.65	7.7	-0.4	-0.01	-47	10.2	55	-0.01	0.01	-350	1740	-124	-15
2021/06/08	-0.03	0.7	-36.55	0.74	-45.51	-19.43	0.73	0.04	49.5	19	60	-0.01	0.01	680	1703	-25	85
2021/06/09	0.47	1.34	-59.46	-7.71	4.33	11.29	0	0.03	18.5	-1	68	0.01	-0.01	547	1749	208	-113
2021/06/10	-0.31	0.27	-9.92	19.63	35.02	19.46	0.3	-0.01	-6	-14.8	50	0	0.01	-680	1595	113	-57
2021/06/11	0.27	-1.11	122.05	8.26	-46.77	-21.11	0.17	0.13	117.5	23.8	65	-0.01	-0.02	-995	1548	-446	-125
2021/06/15	1.5	-1.28	36.25	-0.85	-58.14	-33.19	1.3	-0.05	-27	34.2	26	0.02	-0.01	4	1769	33	43
2021/06/16	-0.57	-0.06	-18.95	-22.89	-86.07	-38.23	0.4	0.02	-3	-11.8	36	0	0.01	-202	1828	-8	20
2021/06/17	0.5	-0.43	17.1	-1.84	21.4	7.27	-1.31	-0.04	57	13.6	33	0.02	-0.06	-269	1787	-1	-3
2021/06/18	0.97	0.99	-279.63	-55.41	0.58	-0.5	0.43	0.02	-54.5	-28.2	29	0.01	-0.04	-350	1819	-31	-33
2021/06/21	-1.29	0.53	155.2	58.34	-12.08	4.08	1.39	-0.03	-17.5	8.8	53	0.01	-0.01	755	1877	26	4
2021/06/22	-0.59	0.98	33.09	21.65	31.77	28.23	-0.09	0.06	31	6.8	69	0.01	0.04	1414	4316	73	30
2021/06/23	0.9	1.25	-179.94	-4.6	25.23	8.81	0.38	0.06	68.5	9.6	66	0	0.01	154	3813	-83	6
2021/06/24	-0.69	0.42	132.84	24.65	8.58	0.43	0.37	0.12	8.5	-3.4	62	0.02	0.02	-1827	4484	-11	-1
2021/06/25	0.32	-0.03	18.74	14.21	84	40.91	0.62	0.1	-0.5	-8.8	59	-0.01	-0.01	-649	4486	-63	-68
2021/06/28	0.31	0.45	-53.79	9.91	11.79	-1.19	-1.5	0.05	-67	-57.8	31	-0.01	-0.01	2997	5088	216	29
2021/06/29	0.21	0.13	136.41	1.19	-61.22	-33.19	0.08	0.07	-34.5	-10.2	58	0	-0.01	-1189	5494	-118	97
2021/06/30	-0.9	0.72	-159.55	5.7	33.5	18.02	0.37	0.08	1	13	43	0	-0.01	-568	5606	-64	-123
2021/07/01	1.76	1.27	72.77	22.44	5.62	-2.42	0.71	-0.08	-34.5	-10.4	27	0.01	-0.02	198	4043	-13	-8
2021/07/02	-1.24	-0.28	46.28	32.4	-148.54	-70.02	0.33	0.04	32.5	7.8	18	0	-0.01	-1142	3356	-3	-10
2021/07/05	-0.24	0.53	11.88	-4.4	4.67	15.56	0.99	0.08	28	40.6	34	0	0.01	54	2940	12	14
2021/07/06	0.92	-3.85	-150.59	-4.4	-2.69	-4.06	-2.63	-0.14	-21.5	-10.4	49	-0.01	0	1207	2977	-19	88
2021/07/07	-0.85	-1.4	181.33	14.59	57.39	23.46	-1.1	-0.08	-17	8.8	48	0.02	-0.02	-158	2776	-10	-76
2021/07/08	-0.34	-0.26	-272.07	-37.31	-52.23	-28.22	0.69	0.1	-101.5	-4.8	32	-0.01	-0.02	385	3003	22	115
2021/07/09	1.15	1.91	267.29	48.73	-18.82	-1.41	1.43	0	26	19.4	26	0.01	0.04	-1125	2254	-123	-91
2021/07/12	-0.09	-2.55	102.58	15.08	63.27	23.75	-0.39	0.07	26	11.6	36	0	0.02	1177	2716	171	17
2021/07/13	-0.21	1.14	-0.87	-15.42	9.39	18.68	1.33	-0.05	77	27.2	31	0	-0.01	1770	4207	-18	112
2021/07/14	-0.4	0.51	-0.66	5.09	-59.02	-38.02	-1.73	-0.02	37	13.6	38	0	-0.05	1772	6853	28	-11
2021/07/15	0.75	-0.38	-159.32	-14.27	68.38	36.09	-1.29	-0.06	-10	-23.4	40	-0.02	0.02	-1234	6124	-27	57
2021/07/16	0.92	-0.1	-89.35	-32.87	-56.69	-25.29	0.12	0.06	48.5	9.6	50	0.01	-0.01	1777	15750	299	263
2021/07/19	-0.64	-0.47	-407.11	-68.67	18.72	-0.18	-4.97	0.09	5.5	31.2	31	0	0	-3706	4602	-275	-317
2021/07/20	0.83	-1.19	83.07	64.57	-4.5	-2.33	0.73	0.15	33.5	4.6	45	0.02	0.01	-1165	2730	-40	-67
2021/07/21	-0.07	0.93	206.23	35.63	35.05	25.87	2.88	0	16	-6.8	42	-0.01	-0.01	-206	2376	-34	-28
2021/07/22	1	-1.34	92.04	8.79	7.71	12.07	1.56	0.08	-5	-2.8	43	-0.01	-0.02	135	2265	-11	12
2021/07/23	0.37	0.1	154.75	44.31	-62.52	-24.33	0.31	0.05	30.5	2.4	39	0	-0.01	-950	1914	-157	-79
2021/07/26	1.95	2.3	-50.31	10.51	-163.93	-82.96	0.4	0.05	38	-14.2	26	0.01	0.01	-144	1791	133	-48
2021/07/27	1.19	-0.29	-99.85	-20.84	-173.99	-86.26	-0.02	-0.16	-18.5	-4.6	21	-0.01	0.02	436	1756	-28	101
2021/07/28	3.5	0.93	51.23	-0.82	9.17	-19.59	0.26	0.02	64	10	17	0.02	0.03	-560	1663	-151	-2
2021/07/29	0.99	0.22	70.11	18.51	89.79	50.13	1.31	0.12	57	16.2	37	0	0.02	-286	1608	-12	-27
2021/07/30	-2.32	-0.72	-96.08	-23.89	-39.1	-14.36	0.28	-0.15	61	8.6	61	-0.03	-0.01	551	1525	251	-54
2021/08/02	2.12	1.1	24.34	-8.1	122.57	66.93	-3.44	0.05	-28	-62	64	0.01	-0.01	165	1541	-23	15
2021/08/03	0.06	-0.24	-13.65	35.99	0.72	-16.3	-0.48	0.1	-67	2.6	54	-0.01	0	-259	1669	-42	10
2021/08/04	0.11	1.27	137.05	-20.49	44.39	29.23	-2.03	0.09	91.5	22	32	0.01	0	1622	3250	-14	-21
2021/08/05	0.45	0.52	52.54	26.44	-30.18	-10.67	0.91	0.01	12	-6.6	30	0	-0.01	-1689	1764	-54	17
2021/08/06	0.08	0.68	16.78	7.42	-27.11	-8.32	-0.59	-0.03	49	-0.6	31	-0.01	-0.01	188	1558	-106	-47
2021/08/09	1.68	-0.04	-16.04	-4.17	64	36.4	-1.66	-0.09	-3	-3	45	0.02	-0.03	3	1697	139	85
2021/08/10	0.04	0.79	25.3	4.4	57.59	35.3	1.59	0.07	-173.5	2.8	30	0	-0.01	227	1607	-57	279
2021/08/11	-0.23	0.36	55.38	10.95	-27.81	2.69	0.81	-0.05	63	13.6	28	0	-0.01	1042	1776	67	-216
2021/08/12	-0.31	-1.51	111.42	13.13	-41.99	-7.88	-0.13	-0.15	-55.5	-129.2	17	0	0	-737	1649	-47	-7
2021/08/13	-0.59	-0.88	39.93	7.17	-27.37	-8.44	-0.72	-0.06	-21	11.8	24	0	0.01	145	1542	-12	35
2021/08/16	0.08	2.78	-51.71	11.71	-4.91	1.04	-1.08	0.09	-4.5	-16.6	33	-0.01	0.02	-897	1473	78	-58
2021/08/17	0.09	-0.92	-3.78	-31.63	-103.67	-70.36	-0.48	-0.11	59	8.8	35	0.01	0	-192	1438	-14	41
2021/08/18	0.21	-0.1	44.02	-47.81	56.84	38.31	-0.8	-0.01	-43.5	6	35	0.01	-0.03	259	1553	-14	-63
2021/08/19	-0.95	-3.63	-200.16	5.53	-32.1	-19.74	-1.78	0.04	91.5	0.8	39	0	-0.01	321	1457	38	-1
2021/08/20	-0.2	0.88	42.23	35.87	-92.87	-38.22	-1.27	-0.02	-49	15.4	27	0.01	0	-373	1150	-105	-8
2021/08/23	0.19	0.97	44.75	37.86	66.61	49.8	3.57	0.09	183	57.2	40	0	0.01	1221	1254	790	15
2021/08/24	0.16	1.29	53.06	6.7	52.51	37.34	2.3	-0.01	44	6	26	-0.02	0.01	167	1337	-192	19
2021/08/25	-0.39	-0.09	-45.19	9.96	9.77	25.91	1.2	0.03	124	24	32	-0.01	0	761	1501	3	104
2021/08/26	0.05	0.32	-67.04	-26.19	-96.55	-38.72	-1.18	0.3	-52.5	-19.8	35	0	0.01	-696	1547	-244	74
2021/08/27	-0.33	2.13	58.13	39.37	25.43	20.5	1.63	0.16	-13.5	-4.8	20	0.02	0	-686	1378	-103	-113
2021/08/30	0.43	1.75	35.56	19.42	-13.77	5.99	0.71	-0.09	-28	8.4	37	-0.02	0.01	-271	1286	-85	-49
2021/08/31	-2.65	0.01	-52.22	-6.11	-7.66	15.79	-0.42	0.09	-35	8	44	0	0	-204	1148	7	-60
2021/09/01	-0.21	-0.65	-10.8	1.41	63.85	23.16	-1.4	0.23	51.5	2.8	52	0	0.01	124	1327	156	18
2021/09/02	-0.06	1.41	16.3	12.86	-0.05	29.94	1.44	-0.01	157.5	31.2	39	-0.01	0.01	139	1189	-122	-13
2021/09/03	0.79	-0.2	-59.39	-1.52	-26.35	-15.31	-0.42	0.07	-54	-10	41	0	0.02	423	1000	-33	1
2021/09/06	-0.28	0.99	150.92	-7.7	90.67	40.13	-0.39	-0.01	163	53	25	-0.01	0	460	1235	9	30
2021/09/07	0.47	-0.32	-89.03	-7.7	59.1	54.73	-0.53	-0.09	129.5	36.6	30	0	-0.01	180	1237	70	80
2021/09/08	0.54	0.46	-232.81	-5.96	-20.7	-1.4	0.91	0.32	-52.5	-8.6	46	0.02	0	-335	1281	-77	-26
2021/09/09	0.24	0.3	12.87	-20.79	-2.12	17.94	-1.15	0.08	194.5	13.4	58	-0.01	-0.02	-102	1158	35	-14
2021/09/10	-0.19	-1.83	-13.34	-34.7	43.51	9.98	1.47	-0.04	-223	-45.2	77	0	-0.01	-1243	954	-164	-7
2021/09/13	-0.04	0.15	91.61	10.15	-21.86	12.26	0.59	0.23	-62.5	42.8	37	-0.01	-0.01	964	1388	171	69
2021/09/14	-0.75	-1.21	21.57	-25.68	-74.5	-52.77	0.09	0.09	-61.5	6	37	0	0	232	1347	247	-23
2021/09/15	-0.79	0	-106.99	37.65	-49.84	-6.38	1.86	0.12	41	35.6	49	0	-0.01	-237	1398	-167	58
2021/09/16	0.01	-0.54	35.75	-6.95	-59.62	-49.13	0.21	-0.13	-60	23.6	69	-0.02	-0.01	52	1135	2	-73
2021/09/17	0.68	0.17	-161.58	-40.76	48.24	6.88	-0.33	-0.22	9.5	4.6	67	0.02	-0.01	-599	1244	-116	-49
2021/09/22	0.12	1.11	16.57	-37.35	-34.17	14.52	0.85	-0.29	235	84	47	0.02	-0.01	4062	1265	1079	70
2021/09/23	0.61	-0.06	137.23	53.34	31.43	13.73	1.06	0.27	74	96	58	0	-0.01	1189	1387	-193	37
2021/09/24	0.37	2.4	-112.22	6.5	-3.77	-29.15	0.84	0.21	-202	-49.8	47	-0.01	0.02	3131	1399	130	-33
2021/09/27	0.63	1.43	42.13	-12.37	27.94	-30.24	1.44	0.62	54	65.8	35	0.01	-0.01	5699	1488	4535	71
2021/09/28	-1.4	-2.45	-325.32	-90.48	6.46	19.39	-0.44	-0.01	138	75	50	-0.01	-0.02	-5840	1372	-2426	-61
2021/09/29	-0.99	0.95	116.71	6.83	-49.9	-65.93	-0.45	-0.39	20	-20	24	0.01	-0.01	-3079	1199	-1878	-44
2021/09/30	0.49	-1.15	-104.58	-51.92	32.45	31.88	-0.12	0.51	278.5	84.8	39	0.02	-0.03	-3902	910	-845	-95
2021/10/08	0.4	-3.38	-54.56	83.8	63.56	24	3.87	-0.36	-133.5	-131.6	27	-0.03	-0.06	-788	1003	-299	68
2021/10/11	2	0.82	-6.99	-30.15	6.25	-0.46	1.26	-0.21	252	146.2	30	-0.01	0	1416	1189	364	32
2021/10/12	-0.89	-0.2	-52.27	-10.54	-52.35	-44.77	-0.23	0.06	56.5	99.6	34	-0.01	-0.02	75	1207	249	13
2021/10/13	0.77	0.14	102.51	13.15	56.27	14.82	-0.24	0.22	9.5	55	32	0.02	0.01	-481	1131	-67	113
2021/10/14	-1.38	2.37	213.34	74.46	-26.5	-3.48	0.82	-0.03	-3.5	53	55	-0.02	0.02	-537	1064	-246	-124
2021/10/15	0.9	-1.99	124.64	33.11	18.5	14.09	0.86	-0.23	142.5	76.2	40	0	0	1505	913	-52	82
2021/10/18	-0.02	-0.89	-112.89	15.09	-57.33	-4.23	-0.53	-0.44	233	137	42	-0.01	-0.01	-1189	1319	-190	-17
2021/10/19	-0.74	-4.01	41.36	33.17	47.94	25.01	0.75	0.08	-118	6.6	50	0	0.01	-175	1155	225	11
2021/10/20	-2.49	3.24	7.09	16.56	-12.54	-6.15	0.74	0.1	-287.5	-80.2	38	-0.02	-0.02	-282	1363	-138	22
2021/10/21	2.13	0.19	-50.36	13.59	17.84	7.78	-1.21	0.04	-332.5	-168	26	-0.02	-0.01	269	1381	-124	-40
2021/10/22	0.72	0.29	70.42	-4.88	31.71	-12.18	0.92	0.11	-234	-222.4	53	0.01	0	-473	1157	92	34
2021/10/25	-0.4	0.72	56.25	21.58	19.79	27.26	0.46	0.66	95.5	-59.4	72	-0.01	0	3492	1201	1685	416
2021/10/26	0	0.92	157.83	8.31	-16.42	-12.22	0.41	-0.14	-20	-68.6	74	0	-0.03	-1862	1148	-35	-213
2021/10/27	-1.37	0.08	-51.25	-23.11	-64.94	-35.33	-1.82	0.39	-247	-92.4	67	0	-0.01	3000	1745	867	33
2021/10/28	0.6	-1.33	-9.48	44.74	-34.02	-43.89	-0.26	0	-200.5	-92.8	86	0.01	0.02	6862	2033	-1467	13
2021/10/29	0.75	0.14	-7.56	8.96	44.63	28.92	0.06	-0.65	-235	-78.8	98	-0.01	0.04	-7914	1384	-486	-27
2021/11/01	-0.38	-1.78	117.52	8.29	-18.08	-2.86	0.33	-0.36	-103.5	-55.4	73	0.03	-0.04	-1313	1392	2168	155
2021/11/02	1.67	2.54	148.16	16.98	-50.84	-38.85	0.01	0.34	40.5	-25.8	101	-0.02	0	656	1408	-1426	-96
2021/11/03	-0.63	0.36	5.53	29.92	-18.74	-7.09	-2.73	0.31	272	86.2	80	0.01	0	-617	1263	-366	-114
2021/11/04	-0.35	0.04	69.67	19.49	47.63	28.33	-1.45	-0.2	-99	-43.6	79	-0.02	0	-519	1381	-393	-17
2021/11/05	-0.29	-0.47	24.71	17.47	-26.39	-35.3	2.2	-0.04	12	10.8	64	0.01	-0.03	-1097	1181	-307	-70
2021/11/08	0.77	1.24	-7.84	4.17	5.83	7.06	0.69	-0.21	-10	-29	33	0	0	-90	1426	406	22
2021/11/09	-1.27	-0.22	-6.05	-16.45	-1.44	8.37	1.35	-0.44	-70	-45.8	43	-0.01	0.01	782	1438	75	-6
2021/11/10	0.69	2.75	27.36	-38.54	-25.55	-14.54	-2.14	-0.05	-69.5	13.4	44	0	0.01	-457	1441	-241	-8
2021/11/11	0.06	0.54	15.28	2.56	77.46	40.33	0.23	0.21	117.5	21.6	55	0.02	-0.04	-527	1365	-22	47
2021/11/12	0	-0.43	10.96	33.58	-10.28	6.31	-0.7	-0.35	-158.5	-41.4	47	0	-0.04	-264	1269	-147	-70
2021/11/15	-0.16	2.7	54.57	-0.05	-5.99	-5.8	-0.12	0.27	-241	-54.4	64	-0.02	-0.02	580	1440	211	71
2021/11/16	-0.14	1.61	99.22	18.1	0.94	-11.51	0.38	0.1	-85	8.2	77	0	-0.04	18	1459	3	4
2021/11/17	-1.25	-0.39	3.39	-12.23	2.43	15.58	-2.15	-0.26	26.5	7.2	156	0	-0.03	-180	1454	16	18
2021/11/18	-4.02	1.94	-29.52	15.87	-48.13	-16.66	0.96	0.01	-54.5	-1.8	132	-0.01	-0.02	273	1370	114	-67
2021/11/19	-3.59	0.27	-61.76	-6.58	52.44	39.66	-2.35	0.18	10	29.2	102	0	0.04	-561	1228	-192	-70
2021/11/22	-1.86	0.57	-44.28	-15.02	22.34	21.71	0.81	-0.29	0	9.8	62	0.02	-0.05	17	1453	-122	110
2021/11/23	0.98	-0.74	-178.69	7.76	0.95	7.01	2.61	0.28	63.5	9	62	-0.01	-0.03	100	1369	81	22
2021/11/24	0.55	3.75	-58.61	10.76	3.31	3.61	-0.06	0.01	230	49.8	60	0	0.01	52	1490	11	-31
2021/11/25	0.93	1.55	39.59	-53.42	-20.22	-8.52	-0.03	0.04	29	-8.4	77	0.01	-0.02	-218	1388	24	-2
2021/11/26	1.28	-1.69	-660.94	-53.42	-36.31	-20.09	-9.5	0.37	-168	-71.8	91	-0.01	0	-111	1343	-167	-135
2021/11/29	-0.28	1.44	23.82	60.65	-8.71	-1.39	0.72	-0.61	38	-30.6	84	0	0.04	417	1355	594	40
2021/11/30	-0.69	1.16	-180.73	-88.27	-19.39	1.19	-2.87	-0.27	62.5	30.2	31	-0.01	0	-535	1382	-378	61
2021/12/01	-0.4	1.45	372.54	-53.96	11.82	13	-1.7	-0.34	0.5	2.4	53	-0.01	0.01	-183	1359	-153	148
2021/12/02	-0.54	3.05	-209.56	64.06	12.31	-3.05	0.8	-0.16	-233.5	-163.6	66	0	-0.01	-219	1312	80	-170
2021/12/03	-0.26	-1.61	-93.13	-38.67	44.86	33.59	0.21	-0.02	108.5	29.6	77	0	-0.01	-416	1242	-68	-22
2021/12/06	0.18	3.02	210.81	53.24	-8.4	-18.12	3.2	-0.41	-56	-32.8	85	0	0	813	1399	232	50
2021/12/07	0.02	3.67	433.15	95.08	29.48	5.78	2.36	0.05	110	10.6	116	0	-0.01	-176	1312	-180	48
2021/12/08	-1.71	4	-126.85	14.46	73.83	42.48	0.38	0.09	15.5	-15.6	158	0	-0.01	39	1190	154	-50
2021/12/09	0.42	-8.64	-47.83	-33.76	82.76	35.47	-1.4	-0.03	-11.5	4.8	156	-0.02	0.02	239	1309	-42	-7
2021/12/10	3.12	3.52	-15.95	44.57	-23.57	-6.69	0.73	0.1	-109.5	1	145	0.02	-0.03	-338	1145	4	-101
2021/12/13	-2.37	-1.64	-1.59	-43.05	28.68	14.73	-0.76	-0.06	100	50.4	149	0	0.03	537	1208	292	112
2021/12/14	0.14	-2.62	-168.16	-34.88	-34.1	-19.55	-0.69	-0.04	-19.5	-15.2	67	0	-0.02	5	1291	-166	-12
2021/12/15	0.4	0.99	22.79	75.76	-43.8	-13.9	0.18	0.03	21	1.2	79	0	-0.01	-245	1256	-23	28
2021/12/16	0	4.32	160.05	-41.18	28.83	27.39	1.14	-0.04	103.5	9.2	78	-0.01	0.01	68	1194	93	-82
2021/12/17	-0.06	-11.54	-104.71	-48.03	-79.97	-42.66	-1.5	-0.11	28.5	18.2	58	0.01	0.03	-1113	1055	-332	-65
2021/12/20	3.24	6.14	-292.02	-52.62	-74.34	-38.76	-2	0.17	6	-30.8	78	0.02	-0.03	382	1059	30	124
2021/12/21	3.22	0.87	207.77	81.21	33.07	31.53	2.46	0.03	54	-2.6	103	-0.02	0	-894	1102	-193	-157
2021/12/22	-0.38	-4.12	146.03	47.33	0.96	-2.51	1.31	0.1	-9	-7.6	135	0	0.01	606	1096	156	68
2021/12/23	-1.52	-2.33	162.84	29.22	34.29	20.72	1.56	-0.24	31	3	115	0	0.01	-67	1151	1	64
2021/12/24	-0.4	1.87	39.47	32.71	-27.4	-25.29	-0.71	0.16	77	5.2	142	0	0.01	-184	904	123	-141
2021/12/27	0.18	0.64	39.47	32.7	-2.02	-2.08	2.46	0.16	-137.5	-18.6	66	0	0	2574	1215	9	19
2021/12/28	0	2.31	128.45	-4.84	36.64	14.14	0.34	0.02	-23.5	-15.2	83	0	0.01	234	1072	-177	1
2021/12/29	0.73	1.11	-111.45	6.71	-72.48	-33.11	0.29	-0.08	20	7.6	87	0	-0.01	-1955	1131	-105	73
2021/12/30	0.37	-0.2	32.61	-14.33	38.03	22.19	0.09	0	8	-3.4	88	0	0.01	-790	987	32	-79
2021/12/31	-0.88	0.45	133.88	-12.55	18.86	20.59	-1.54	-0.23	34.5	-6	93	0.01	0	2571	822	-264	-194
2022/01/04	1	4.33	133.87	27.36	-22.6	-7.45	2.22	-0.01	108.5	41.6	159	0	-0.01	-2630	1126	-171	167
2022/01/05	0.7	2.69	119.14	-92.96	-49.65	-37.15	0.8	0.09	17	-11.2	52	0	-0.01	-77	1042	48	13
2022/01/06	0.3	-0.84	-219.72	-4.53	-49.89	-9.1	1.19	0.01	-20	-5.4	27	-0.01	0.01	-14	1013	43	52
2022/01/07	0.59	-1.31	-104.29	-19.02	4.14	-6.54	-0.24	0.09	-56.5	16	57	0	-0.01	-247	940	-55	-16
2022/01/10	0.89	-5.29	-179.47	-6.74	21.68	13.98	-0.88	0.17	8	-13.2	97	0	0.03	-62	1028	-111	121
2022/01/11	-0.33	1.23	173.54	42.78	-46.28	-26.08	2.85	0.11	9.5	-17	161	0	-0.01	83	942	0	125
2022/01/12	0.35	-1.28	68.51	13.28	47.81	29.99	0.95	0.56	55.5	9.8	142	0	0.02	-137	955	-44	-222
2022/01/13	0.48	0.55	21.27	-67.32	-79.66	-42.17	-0.2	-0.52	-46	-3.8	123	-0.02	0.02	-653	922	52	-70
2022/01/14	0.18	1.52	-148.35	3.82	-39.19	-34	1.59	-0.03	-5	3.4	106	0.02	0.03	41	814	-91	0
2022/01/17	-0.43	-1.5	50.48	-42.87	40.55	20.41	0.42	0.02	-102.5	22.4	156	-0.01	-0.03	724	1021	211	39
2022/01/18	-0.26	2.06	-161.16	-42.87	46.07	28.24	1.03	0.08	115	34.6	227	-0.01	-0.01	2961	1086	-10	275
2022/01/19	0.13	-0.56	37.16	-44.35	-32.97	-11.73	0.93	-0.31	-55	25.4	189	0.01	-0.04	-462	1125	-115	50
2022/01/20	-0.38	3.5	102.61	-50.03	43.13	-3.12	-0.06	-0.18	55	0	191	-0.01	-0.01	-2699	845	-130	-373
2022/01/21	0.56	-1.15	-308.45	-84.79	-44.2	-32.49	-0.49	0.12	-105.5	-7.6	98	0	-0.02	-736	800	-121	-60
2022/01/24	0.49	-0.45	-592.75	12.19	7.43	1.54	-1.62	-0.14	-40.5	-27.6	57	-0.01	0.01	-394	746	13	0
2022/01/25	0.89	3.43	112.74	-53.68	-108.29	-91.05	1.93	0.06	45	38.4	93	0	-0.01	751	843	521	23
2022/01/26	0.42	1.21	335.52	-6.52	33.86	22.61	1.76	0.12	-7	10	61	-0.02	-0.03	7	798	123	0
2022/01/27	1.19	1.1	64.88	-23.42	-92.43	-61.42	-0.62	0.34	74	20	45	0.02	-0.03	-658	681	-502	-52
2022/01/28	3.67	-0.56	-205.32	105.34	-56.11	-32.81	0.69	0.35	3.5	-51.8	57	0.03	-0.02	409	620	-204	-87
2022/02/07	4.74	7.43	-112.31	52.02	70.32	68.14	2.66	-0.41	30	66.4	30	-0.01	0.15	100	879	135	173
2022/02/08	5.22	0.22	35.74	37.67	-25.32	23.05	-1.91	-0.07	158.5	54.2	33	0	0.02	352	997	169	120
2022/02/09	4.08	-6.1	239.63	65.64	43.29	27.32	0.77	-0.18	-150	-40.2	47	0.01	0	1987	1261	32	42
2022/02/10	-6.15	-0.01	8.43	-83.1	-12.2	5.96	-0.14	-0.09	21.5	7	52	-0.01	-0.01	-606	1201	-4	-11
2022/02/11	-5.23	2.09	-65.32	-85.44	-38.46	-22.96	3.03	0.06	10.5	-21	67	0.01	0	-289	1038	32	-56
2022/02/14	2.9	-1.16	-311.15	-16.97	-49.71	-34.07	2.04	0.18	73.5	-3.4	63	0	-0.03	-1137	911	-92	-37
2022/02/15	1.01	-0.62	298.74	69.4	48.41	17.21	-3.2	0.21	-12	-44.2	90	-0.01	-0.04	-241	926	-12	4
2022/02/16	-0.69	-1.33	-42.41	3.94	17.89	19.74	1.53	0.24	24	5.6	107	-0.01	0.02	411	919	25	38
2022/02/17	-0.55	-3.41	-102.67	-94.75	11.17	2.21	-1.84	-0.12	1	-10	42	-0.02	0	295	1093	173	75
2022/02/18	0.23	3.07	-225.12	-31.39	22.08	22.72	0.57	-0.06	119.5	41.4	31	0	-0.01	-83	1256	-97	715
2022/02/21	-0.31	0.23	-311.39	-22.05	-16.93	-0.15	1.85	0.31	88.5	29.2	62	0.01	-0.03	571	1157	106	-552
2022/02/22	-0.93	0.1	-38.12	-22.06	-60.16	-33.46	1.45	-0.26	-53.5	-31.2	87	0.01	0.01	-227	1152	-13	-40
2022/02/23	-0.12	5.31	-61.64	-79.26	48.9	32	0	0.09	89	21	75	-0.02	-0.01	-338	1169	83	-64
2022/02/24	0.12	-8.04	-579.26	63.2	-93.73	-59.19	2.24	0.08	-47	-20	96	0	-0.02	65	1046	-86	70
2022/02/25	-0.07	1.09	515.13	95.95	44.1	21.45	-1.15	0	-123.5	-66	86	0	-0.06	-729	872	-185	-154
2022/02/28	-0.21	-5.88	-106.21	-10.71	8.23	10.9	3.06	-0.26	103	26.4	88	-0.01	-0.02	800	1087	250	53
2022/03/01	-0.98	-13.3	-556.17	-67.68	38.04	26.52	3.98	0.19	109.5	43.6	97	-0.02	-0.01	-48	1061	-30	-32
2022/03/02	0.04	-0.25	95.26	80.28	-41.09	-4.64	7.96	0.19	54	42.8	91	0.04	-0.01	823	1119	659	102
2022/03/03	-1.43	-1.16	-301.71	-23.05	-26.97	-3.08	-2.47	-0.06	104.5	-11.8	98	-0.04	-0.05	-77	1136	361	-28
2022/03/04	0.19	-2.27	-603.86	-34.62	-55.2	-33.46	7.65	0.19	-14	6.2	87	0.03	-0.01	-1047	1031	-624	-31
2022/03/07	-1.9	-6.83	-259.89	-127.78	-143.65	-74.79	5.1	-0.11	267.5	66.8	47	0.02	-0.09	705	1071	11	66
2022/03/08	-0.11	10.21	-3.14	-30.39	-87.39	-79.33	4.77	-0.23	-79	-17.6	62	-0.03	-0.04	-604	944	-293	33
2022/03/09	0.93	4.66	1016.42	107.18	-39.04	-37.14	-16.84	-0.05	49	-49.4	56	0	0.02	660	1087	207	-49
2022/03/10	-1.02	3.2	-405.83	-18.36	66.49	39.7	-1.81	0.12	-26	-11	64	-0.01	0.1	181	1142	0	132
2022/03/11	0.7	0.35	186.01	-55.21	13.68	13.66	3.34	0.12	-42	-23	77	0.02	-0.02	-1061	841	-311	-203
2022/03/14	-0.3	1.5	301	-31.2	-131.76	-86.22	-5.77	-0.1	-239.5	-8	115	0.02	-0.03	97	987	202	145
2022/03/15	0.01	-0.83	-11.84	89.34	-190.95	-159.56	-6.99	-0.05	-22	-8	148	0.03	0.03	30	1017	21	22
2022/03/16	-0.12	0.73	523.47	95.41	172.27	106.74	-1.89	0.13	140.5	13	80	0	0.03	137	952	-53	-148
2022/03/17	-0.17	1.76	-52.68	53.81	81.62	44.33	8.62	0.19	-22	1.6	22	-0.04	-0.01	-80	940	-59	274
2022/03/18	-0.01	-1.02	25.03	51.45	28.2	36.03	1.29	-0.03	156	12.4	34	0	0.05	-356	1016	-52	-99
2022/03/21	-0.37	-0.52	-86.12	-1.94	-7.15	2.62	7.69	0.04	-32	5	13	0.03	0	29	971	-19	-138
2022/03/22	-0.03	2.28	146.23	50.43	-3.45	6.17	-0.14	0.19	-97	21	18	0	-0.02	192	1023	132	251
2022/03/23	-0.63	-4.03	-189.55	-55.37	21.22	11.17	6.12	-0.01	18	23.6	23	-0.01	0	114	1022	100	-28
2022/03/24	-0.71	1.66	-9.86	63.92	-25.21	-20.77	-2.57	0.28	57.5	-8.6	32	0	-0.01	177	1037	33	-178
2022/03/25	-0.58	0.37	31.97	22.9	-76.74	-38.02	1.62	0.17	108.5	-4.4	20	0.01	0.02	-365	970	-128	-29
2022/03/28	0.76	2.23	111.61	32.46	-26.1	2.26	-8.17	-0.1	-5.5	-18.2	69	0	-0.02	239	958	65	-16
2022/03/29	1.24	0.91	402.96	56.08	-14.33	-10.56	-2.25	-0.15	93	-6.8	42	-0.01	0	151	1036	-61	103
2022/03/30	-0.28	-3.42	-214.28	-29.15	119.96	62.66	3.22	0.24	-21.5	-26.6	60	0	0.05	-603	1085	0	-27
2022/03/31	0.17	-1.8	-191.3	-72.04	-31.5	-14.4	-5.54	0.06	14	-9	68	-0.01	0.03	-312	1001	-139	-34
2022/04/01	0.03	2.03	31.73	15.45	53.56	30.52	-3.52	0.09	58	4.2	47	0	-0.05	-435	899	-30	-12
2022/04/06	0.09	-1.33	-294.79	-64.71	-12.32	0.71	-3.32	0.37	-3.5	-2.8	54	0.03	-0.07	981	931	26	352
2022/04/07	0.07	2.76	-73.54	19.06	-54.74	-46.73	-0.49	0.3	-40.5	-4.4	69	-0.01	-0.02	166	928	200	-354
2022/04/08	0.1	0.15	205.52	-11.93	21.67	15.15	2.2	-0.07	14	1.2	67	0	-0.02	-243	904	-197	6
2022/04/18	-0.09	-0.15	-65.11	-96.59	-64.39	-56.33	10.38	1.67	-57	12.8	53	0.01	-0.02	234	1033	258	-48
2022/04/19	0.01	0.2	-65.1	70.52	-31.48	-1.49	-5.91	-0.57	-142	13	58	-0.01	-0.03	77	1034	13	171
2022/04/20	-0.09	7.62	208.57	-2.76	-64.11	-42.98	-0.45	-0.37	-7	-16.6	62	0.03	0.02	643	1030	-45	-41
2022/04/21	0.09	-1.41	140.38	-65.79	-74.96	-71.24	1.53	0.11	55	13.4	50	0.01	0.06	-126	963	54	-107
2022/04/22	-0.14	2.49	-360.32	-121.88	17.42	7.11	-1.68	-0.48	-62.5	-3.8	55	0.05	0.06	65	978	105	-23
2022/04/25	0.04	-5.55	-217.92	24.34	-198.34	-158.41	-4.33	0.36	-140.5	-7	28	0.03	0.01	-587	960	-154	-39
2022/04/26	0	-0.73	-167.77	-120.92	-30.79	-42.08	2.67	0.06	51	0	34	0.07	0.01	18	1040	-68	-25
2022/04/27	-0.11	-1.69	37.54	8.76	111.42	71.85	0.33	0.4	-72	0.4	35	0	-0.05	18	1026	22	101
2022/04/28	-0.01	1.66	185.9	103.54	25.57	17.2	2.27	-0.44	4	9.6	37	0	-0.05	8	961	200	-5
2022/04/29	-0.22	1.75	118.04	-155.57	95.13	71.58	1.75	0.31	9.5	-1.4	31	0.06	0.02	-662	861	-552	-195
2022/05/05	-0.26	4.46	-195.36	14.94	-6.03	20.7	1.56	1.49	-73.5	32.4	31.3	-0.05	0.02	1374	1105	547	136
2022/05/06	-1.58	2.61	-228.23	-23.53	-101.39	-66.2	1.49	-0.82	-54	-8	31.5	0.06	0.03	-646	1081	-396	6
2022/05/09	-1.8	-4.53	-293.62	-132.1	-31.38	2.58	-6.45	-0.92	-73.5	-11	31.8	0.06	0.05	52	1114	265	-43
2022/05/10	1.15	0.3	154.07	9.81	42.43	31.7	-3.48	0.27	-41.5	-18.8	32.1	0.02	0.04	258	1180	294	67
2022/05/11	0.15	1.51	293.9	-65.87	56.55	22.86	5.05	0.35	53	11	32.3	0.02	0	-99	1130	-162	-5
2022/05/12	-0.36	-0.58	-89	-5.1	-17.68	-3.71	-0.06	0.01	-119.5	2	32.6	0	-0.01	474	1199	167	37
2022/05/13	0.24	0.22	288.29	93.81	29.86	29.29	4.1	-0.03	30.5	12.2	32.9	0.06	-0.02	-684	1012	-176	17
2022/05/16	2.35	1.08	-63.55	-15.88	-32.06	-10.53	2.69	0.35	126	-2	33.1	0	0	226	1002	331	-54
2022/05/17	0.33	2.15	221.56	80.84	49.35	19.95	-2.31	0.33	11.5	-0.2	33.4	0	0.02	303	1197	81	45
2022/05/18	-0.08	-7.06	-178.18	-165.17	-13.98	-7.72	-2.82	-0.05	-125.5	0.8	33.7	-0.05	0.03	-51	972	-58	111
2022/05/19	0.05	-1.43	-125.46	-22.89	7.69	10.98	2.93	-0.15	30	-16	34	0.01	-0.04	-5	1084	-39	-102
2022/05/20	0.04	-2.79	99.61	0.57	78	49.61	0.51	-0.05	54	4	34.2	0	0.07	-594	997	-248	-85
2022/05/23	0.02	-2.23	193.49	72.39	-23.62	0.29	0.87	0.67	-103	22	34.5	-0.07	-0.08	130	928	11	40
2022/05/24	0.1	3.23	-255.65	-32.27	-94.83	-75.93	0.14	0.06	-88.5	0	34.8	-0.02	0.05	330	1025	-65	61
2022/05/25	0.28	0.06	88.18	37.25	24.03	36.53	0.47	0.11	13.5	6.2	35	0	0.03	71	1030	276	11
2022/05/26	-0.08	3.36	223.36	79.11	9.86	15.65	3.37	-0.16	-19.5	-1.8	35.3	0.02	0	-149	994	-117	-45
2022/05/27	-0.02	-0.56	230.9	100.4	8.26	7.13	2.03	-0.12	86.5	14.2	35.6	0.06	0.09	-186	951	816	-131
2022/05/30	0	-0.23	113.79	-13.04	27.72	18.82	2.24	-0.01	85.5	-18	35.8	-0.04	-0.04	307	1085	-159	46
2022/05/31	-0.04	0.05	-187.63	-13.05	62.5	37.37	1.17	-0.42	50.5	27.4	36.1	-0.04	-0.02	-34	1030	-50	94
2022/06/01	-0.12	2.06	-47.88	-30.92	-8.34	-4.27	-6.55	0.49	85	-24	36.4	0.01	-0.02	-667	796	-235	-36
2022/06/02	0.08	0.26	144.7	75.59	6.39	13.3	1.32	-0.35	33	23	36.6	0.04	0	88	763	-349	-106
2022/06/06	0.18	-4.89	168.64	-55.39	76.52	40.91	1.9	0.91	63	-9	36.9	-0.04	0.01	541	994	263	120
2022/06/07	-0.08	-0.1	-97.19	39.25	13.04	5.39	1.06	0.01	-19.5	3.2	37.2	-0.01	-0.04	-153	965	-78	114
2022/06/08	-0.1	-1.46	-110.63	-44.91	40.68	22.03	3.01	-0.73	88	7.2	37.4	0	0.01	137	1146	222	-128
2022/06/09	0.38	1.23	-247.19	-97.95	-44.14	-24.84	-0.51	0.39	-72	1.6	37.7	0.02	0.03	3	1079	351	78
2022/06/10	-0.04	0.85	-436.97	-116.96	63.32	45.88	-1.06	-0.24	-9	-15	38	0.02	-0.05	-626	926	-663	-178
2022/06/13	0.51	-0.34	-334.8	-151.23	-49.64	-29.28	0.26	-0.09	6	-8.2	38.2	0.02	-0.06	773	1169	579	91
2022/06/14	-0.46	2.58	-122.64	-14.15	32.96	33.36	-1.1	-1.41	-26.5	-10.4	38.5	0.03	-0.02	351	1159	207	141
2022/06/15	0.51	2.08	180.9	54.51	55.91	16.5	-2.66	0.28	-172	-3.4	38.8	0	0.01	348	1264	410	76
2022/06/16	-0.11	-3.22	-446.8	-123.22	-28.16	-20.03	1.3	-0.11	-62	0.2	39	-0.04	-0.03	-576	1147	-743	-50
2022/06/17	0.04	-0.61	87.77	8.07	58.98	31.41	-6.69	-0.42	-32.5	20.8	39.3	-0.02	0.05	-448	941	-279	-157
2022/06/20	-0.04	1.6	139.34	44.98	21.39	-1.36	1.01	-0.32	-254.5	-33	39.6	0.02	-0.02	-557	921	-104	-95
2022/06/21	0	0.73	26.8	44.97	-4.86	-8.71	0.52	0.14	16.5	11	39.9	-0.02	-0.01	576	972	-122	174
2022/06/22	0.74	-2.85	-148.12	-4.9	-54.95	-39.52	-2.91	0	-47	0.2	40.1	0.02	0.03	-535	817	-307	-157
2022/06/23	0.24	2.24	-231.69	35.84	73.26	52.95	-1.69	-0.62	97	11.6	40.4	0	0.03	-216	889	-227	8
2022/06/24	0.62	-0.7	205.54	116.01	50.89	29.6	3.07	0.06	-100.5	-12.8	40.7	-0.01	-0.04	-286	825	-185	-72
2022/06/27	-0.14	1.62	67.94	-11.63	49.49	29.44	1.97	0.19	104	1.4	40.9	-0.01	0.01	-209	759	-219	2
2022/06/28	0.12	2.3	45.75	-78.56	46.26	30.02	2.89	0.19	123.5	-4	41.2	0	0.02	599	829	59	31
2022/06/29	-0.17	0.95	-228.47	-2.72	-69.16	-47.69	-1.72	-0.23	-25	19.4	41.5	0.01	-0.03	-168	787	147	-24
2022/06/30	-0.8	1.81	-76.66	-33.45	63.65	37.1	-1.45	-0.91	-147	-23.4	41.7	0.01	-0.04	-25	815	104	-77
2022/07/01	0.38	-4.58	-76.65	39.95	-18.29	-10.98	-3.18	0.11	-63	30.2	42	-0.02	0	-58	709	-335	78
2022/07/04	0.21	-1.01	-76.66	3.03	29.31	17.79	1.87	0.26	-73	2.4	32	0.02	-0.01	1101	832	231	-16
2022/07/05	0	-1.3	-372.18	3.03	-6.49	-1.4	-10.73	-0.42	54.5	0.4	16	-0.01	-0.01	-239	878	-196	30
2022/07/06	0.04	-0.05	193.32	13.69	-65.57	-48.68	-2.08	0.09	14	-24	22	0.02	-0.09	-428	769	-29	-39
2022/07/07	0.22	1.7	248.7	57.54	19.5	9.05	3.96	0.64	-1	21.2	46	-0.01	-0.06	-429	722	-103	-50
2022/07/08	-0.42	-2.13	172.01	-3.24	-14.69	-8.32	2.37	-0.12	-69	-7	22	0	-0.02	-322	772	-7	-60
2022/07/11	0.36	1.56	-182.79	-44.95	-74.16	-42.5	0.08	0.45	-13	0	28	-0.01	-0.01	1139	776	17	44
2022/07/12	0.01	1.3	73.04	-35.63	-41	-32.11	-7.61	-0.25	-91.5	-15.6	29	0.03	-0.05	49	770	-34	-19
2022/07/13	-0.1	-1.78	-149.16	-17.02	7.84	2.82	0.08	0.33	16.5	13	31	0	-0.01	-946	759	83	73
2022/07/14	0.3	0.11	-236.66	-11.4	0.61	-2.55	-0.47	0.06	-29.5	-17	36	0	0	-214	767	-98	8
2022/07/15	-0.01	1.39	345.06	72.78	-73.54	-53.68	2.06	0.46	-124	-4.8	39	0.02	0.01	-256	822	49	-159
2022/07/18	-0.62	-0.43	95.09	-32.31	44.06	50.04	5.11	0.32	131	40.2	52	-0.01	0.04	1386	994	-21	44
2022/07/19	0.33	-1.29	348.6	105.84	-23.25	1.33	1.08	-0.14	-121	-20.2	40	0.01	0.04	-189	962	-60	200
2022/07/20	-0.02	-4.79	-26.43	23.21	14.46	25.29	-0.43	0.57	-52	-21.4	23	0	0.06	-159	994	13	-87
2022/07/21	-0.03	-0.73	-35.34	39.05	-47.74	-32.72	-3.06	0.01	-60	8	37	0.01	-0.02	-174	942	3	-4
2022/07/22	-0.15	-1.82	7.04	-37.32	2.17	-2.03	-0.66	0.43	62	10.2	31	-0.01	0.02	-444	875	-49	-44
2022/07/25	-0.01	0.05	-43.36	5.21	-25.59	-19.58	1.95	0.33	31.5	-2	44	0	-0.01	-461	824	-23	30
2022/07/26	-0.52	0.31	-113.39	-45.79	33.34	27.05	-0.75	0.07	21.5	0	48	0	0.01	117	803	79	-66
2022/07/27	-0.02	-0.54	69.45	102.56	-20.94	-1.68	2.22	-0.13	9.5	-8	46	0.02	-0.04	5	790	15	69
2022/07/28	-0.01	2.83	115.73	48.82	0.63	6.82	0.52	-0.42	186	28	38	-0.03	0.02	137	764	102	-77
2022/07/29	-0.44	-0.41	201.94	57.86	-55.57	-29.34	2.87	0.13	-39.5	-11	33	0	-0.01	-314	800	-54	-9
2022/08/01	0	2.01	-4.42	-11.66	18.58	6.72	-9.98	-0.08	29	-16.4	69	0.01	0.02	-394	801	-67	6
2022/08/02	-0.12	1.38	-30.43	-27.44	-81.66	-73.69	0.51	-0.52	94	13.4	61	0	0.04	-17	755	-9	-101
2022/08/03	-0.11	2.05	138.36	63.98	-40.04	-22.6	-3.76	0.61	-44	3	57	0.03	-0.04	-190	706	-108	48
2022/08/04	-0.88	0.19	75.12	-3.23	34.56	25.37	-2.66	-0.16	-79	1	53	-0.02	-0.02	-29	673	-36	100
2022/08/05	-3.37	0.58	-88.75	-6.75	55.37	37.99	0.8	-0.13	-45.5	-15	33	-0.02	0.04	111	693	-46	-49
2022/08/08	1.56	-0.95	113.76	-5.13	-8.84	9.9	1.73	-0.35	95	19.6	32	0.03	-0.03	-132	723	122	-76
2022/08/09	-0.19	2.12	-152.72	-17.59	8.22	10.5	-0.34	0.18	-1	-4.6	35	-0.01	0.01	-4	783	-97	159
2022/08/10	-0.38	-0.02	165.96	87.77	-46.55	-17.41	1.09	0.38	-54	-0.2	52	0	0.01	54	785	50	-114
2022/08/11	0.01	1.64	-6.42	-2.97	83.8	51.65	2.2	0.49	7	-1.4	30	-0.03	0.03	8	765	36	10
2022/08/12	-0.01	1.31	101.34	72.88	-2.39	-4.78	-1.45	0.07	54.5	-8.2	30	0.01	0.03	28	737	-11	17
2022/08/15	1.41	1.9	20.76	16.99	-5.47	-0.8	-3.05	0.03	-38	9.8	34	0	-0.04	335	803	-17	59
2022/08/16	1.07	1.29	93.51	8.06	-7.84	1.79	-2.76	0.54	44.5	0	56	0.03	-0.04	-159	760	105	-31
2022/08/17	-0.57	3.63	-283.41	-31.16	39.12	14.65	1.31	-0.17	-282.5	-1.2	42	0.02	0.02	-15	769	-6	-24
2022/08/18	0.65	0.32	70.7	9.7	-36.86	-14.99	2.94	0	-25	-8.8	39	-0.01	0	261	762	55	-12
2022/08/19	0.05	1.95	-152.89	-55.26	-29.03	-19.46	0.13	0.1	-17	-9.4	37	0.03	-0.03	-211	740	-56	-23
2022/08/22	0	-5.84	-313.95	-90.49	30.33	19.71	-0.24	0.48	89.5	-14.6	25	0.01	-0.03	309	739	252	53
2022/08/23	0.47	-2.89	-36.34	-9.26	-20.32	-1.57	3.74	-0.51	-2.5	4	41	0.03	-0.03	28	773	-5	14
2022/08/24	0.21	-0.08	25.83	12.04	-78.66	-61.02	1	-0.01	-10.5	40	28	-0.01	0.01	-76	648	-216	16
2022/08/25	0	0.09	51.9	58.35	33.82	31.05	-1.88	0.09	12.5	10	49	0.01	0.02	1135	737	73	-47
2022/08/26	-0.36	0.99	-300.49	-141.46	-8.69	-10.03	1.65	-0.02	89.5	-48.6	40	0	-0.01	-793	812	-131	-38
2022/08/29	0.01	-3.7	-78.48	-27.05	-18.03	4.51	4.1	-0.05	-86.5	-9.2	23	0.02	0	-152	745	144	96
2022/08/30	0.05	-5.9	68.15	-44.45	-13.73	-13.51	-5.78	-0.18	-95.5	-1.6	21	0.01	0.07	-76	725	-65	76
2022/08/31	0.26	-0.73	-126.18	-31.16	3.05	-25.08	-2.82	0.06	1	0	24	0.01	0.02	-259	640	4	-120
2022/09/01	0.09	0.72	-204.73	11.85	-35.1	-17.16	-4.13	0.03	-51	0	27	-0.01	0	-150	616	-78	-15
2022/09/02	-0.17	-2.88	420.04	-42.59	-20.13	1.5	0.66	-0.27	32	165.8	39	0.01	-0.04	39	611	-32	-72
2022/09/05	0.01	-3.4	-289.49	-8.03	-8.18	13.43	2.72	-0.14	22.5	0	56	0.01	-0.03	95	680	78	34
2022/09/06	-0.5	-4.48	110.66	-8.04	36.85	43.54	-2.91	-0.74	-16.5	43.6	72	0.01	0.04	-12	688	-7	88
2022/09/07	0.48	-0.86	44.53	71.68	2.7	2.84	-4.83	-0.16	-33.5	40	68	0.01	-0.01	68	686	-28	6
2022/09/08	-0.9	-1.78	-11.65	26.31	-17.3	-10.7	1.15	0.11	43	14.8	67	-0.01	0.06	95	721	-34	-166
2022/09/09	0.91	-1.21	183.89	61.18	56.11	26.46	3.69	0.07	37.5	0	46	0	0.01	-417	581	-246	-62
2022/09/13	0	3.64	100.74	-134.67	17.32	1.75	0.33	0.36	65.5	0	47	-0.02	0.05	230	724	224	230
2022/09/14	0.01	2.78	-160.95	13.32	-45.75	-26.26	0.93	0.69	-13	-66	34	0.02	-0.08	-17	726	101	-21
2022/09/15	-0.11	-0.69	-71.34	-44.66	-38.24	-37.62	-3.26	-0.8	57	36.6	50	0	0	179	742	77	19
2022/09/16	-0.07	1.42	-215.4	-28.02	-94.44	-73.52	0.51	-0.47	0.5	0	44	0.02	0.02	502	621	-29	-70
2022/09/19	-0.02	-2.16	61.98	26.56	-4.68	-10.8	0.65	0.05	23	0	58	0.01	0.03	-214	858	-35	71
2022/09/20	0.46	0.03	-132.41	-43.96	4.84	6.81	-1.38	-0.13	-21	-41.4	35	0.01	0.02	130	784	36	30
2022/09/21	-0.37	-1.34	96.32	-66	-29.11	-5.23	-0.79	0	41	31.4	45	0	-0.03	-190	685	-3	70
2022/09/22	0.08	0.65	-235.52	-31.94	-34.39	-8.27	0.63	-0.55	26.5	0	41	0.03	-0.06	-117	741	19	-107
2022/09/23	-0.06	-4.64	-247.44	-64.76	-13.32	-20.54	-4.31	-0.35	-2	-1.6	64	0.01	0.01	-190	617	-121	-45
2022/09/26	0.07	4.56	-56.27	-38.19	-19.34	-37.14	-2.09	0.2	-3.5	-13.8	66	0.04	-0.07	116	644	322	62
2022/09/27	0.32	-2.19	-88.24	-7.75	55.62	42.63	2.21	-0.27	55	-16	72	0.04	-0.01	-39	666	-225	101
2022/09/28	0.51	-2.81	43.6	71.75	-63.59	-48.79	3.05	0.25	-35	-14	54	0.04	0	-94	744	0	-110
2022/09/29	0.3	0.55	-207.73	-78.57	-1.57	-3.87	-0.83	-0.13	9	-26.8	85	0	0.1	-93	750	-91	-1
2022/09/30	0.07	1	138.81	-54.85	-22.25	-16.81	-0.53	-0.06	1	-72.2	88	-0.01	0.06	-383	519	-231	-146
2022/10/10	-0.02	0.04	158.58	26.77	-83.95	-50.24	8.23	-0.31	111.5	-70	86	0	-0.07	733	731	371	227
2022/10/11	0.55	-0.44	-52.69	-23.55	6.75	5.64	-1.9	0.07	-42.5	64.2	84	0.01	-0.01	-34	721	-58	16
2022/10/12	-0.01	0.38	-47.99	-11.81	56.62	45.72	-1.84	-0.15	-33	-61.4	82	0	0.01	44	739	14	-65
2022/10/13	0.05	2.12	183.32	92.88	-31.64	-9.15	2.12	0.25	-25.5	25	80	0	0	-117	709	-15	-88
2022/10/14	0	-0.82	82.23	-86.84	89.8	55.63	-2.94	-0.21	51.5	29.6	78	0	0.04	-108	668	-40	99
2022/10/17	0.16	-0.51	211.22	94.88	3.94	12.95	-0.01	-0.49	-105.5	0	76	0	-0.01	984	734	860	-89
2022/10/18	0.58	0.26	116.58	42.03	-8.14	-3.98	-1.59	-0.3	-26	0	74	0	0.06	-686	806	-397	65
2022/10/19	0.25	-0.47	-24.2	-24.82	-61.74	-36.58	2.38	-0.25	5	-29.6	72	0	0.02	81	784	53	140
2022/10/20	-0.1	-0.42	26	-29.38	-21.6	-9.33	-0.03	-0.12	-38.5	-18.2	70	0.01	-0.04	-88	812	-122	-136
2022/10/21	0.14	1.86	-36.51	86.97	-12.04	3.88	1.12	-0.33	26	0	68	0	0	-74	743	1	-58
2022/10/24	0.41	3.59	200.55	44.59	-109.52	-61.37	-0.24	0.18	20	0	66	0	0.05	-84	743	-157	4
2022/10/25	-0.28	4.77	121.51	61.77	-5.92	-1.28	0.26	1.11	-84	0	64	0.05	0.05	238	722	81	244
2022/10/26	-0.09	-1.33	142.85	-28.51	29.45	23.22	2.17	-0.08	-8.5	0	62	-0.01	0.07	-161	749	-38	1716
2022/10/27	0.07	4.4	15.42	-23.3	-25.76	-16.6	1.27	-0.36	-14.5	0	60	0	0.06	47	748	143	-1595
2022/10/28	-0.65	0.98	32.1	93.76	-89.81	-66.97	-1.19	-0.04	-18	0	58	0.01	-0.06	-224	674	-124	-209
2022/10/31	0.26	-1.25	10.41	-29.08	-32.63	-22.45	-0.94	0.49	-60	58.4	56	0.01	0.01	-10	742	99	-197
2022/11/01	0.01	-3.11	85	-15.88	125.47	75.72	-0.18	-0.46	76.5	0	54	0.03	-0.04	94	686	-41	96
2022/11/02	0	-0.03	-82	-96.41	43.64	34.17	1.51	0.37	20	0	49	0.01	0.01	36	752	120	-5
2022/11/03	0.16	-0.41	-126.55	-39.8	-29.91	-5.56	-1.49	-0.27	12.5	0	53	0.03	-0.02	-160	713	-212	4
2022/11/04	-0.43	0.08	329.66	50.66	119.27	72.99	3.9	0.53	91	0	81	0.01	-0.02	-181	646	-88	-34
2022/11/07	0.36	1.14	73.67	36.25	8.13	7.02	-0.65	0.24	2.5	0	67	-0.03	0.08	333	654	257	104
2022/11/08	-0.32	-1.41	155.23	21.31	-25.97	-13.33	-2.56	-0.5	21.5	0	61	-0.01	0.05	20	691	161	24
2022/11/09	0.02	-3.31	-22.43	-79.54	-35.06	-16.32	-2.71	-0.25	5	0	68	0	0.03	75	693	51	-55
2022/11/10	0.16	0.29	479.77	207.8	-28.58	-12.04	1.02	0.21	-62	0	72	0.02	-0.01	-223	681	-167	-64
2022/11/11	-0.31	2.78	78.77	36.56	102.75	51.16	2.32	-0.26	94.5	0	66	-0.05	0.08	-292	678	-341	-4
2022/11/14	-0.84	-0.6	88.44	-35.68	5.58	-3.89	-2.85	0.17	-4	0	26	-0.1	0	367	709	330	23
2022/11/15	0.46	1.43	65.21	34.48	71.95	50.68	0.72	0.09	37.5	0	43	-0.05	-0.06	-50	702	143	-12
2022/11/16	-0.06	-3.23	-144.48	-32.94	-31.58	-14.1	-1	0.04	7	0	52	0	0.01	107	802	-82	94
2022/11/17	0.06	-1.01	32.35	-12.23	-15.73	-4.55	-3.08	0.2	3	0	55	0.03	0.06	-2	646	109	-9
2022/11/18	-0.38	0.07	165.48	18.78	-17.09	-18.19	-2.16	-0.03	23.5	0	73	0.04	0.02	-151	664	-371	-98
2022/11/21	-0.11	2.13	-51.93	-15.4	-32.44	-12.2	-0.17	0.32	-64.5	0	41	0.02	0	-27	682	-30	-52
2022/11/22	-0.05	-0.74	42.42	53.64	0.44	3.9	0.91	0.22	-44.5	0	21	0.04	-0.02	-139	736	45	48
2022/11/23	0.4	1.97	5.24	23.68	3.96	7.97	-2.95	0.85	52.5	0	44	-0.04	0.01	65	583	-8	45
2022/11/24	-0.5	2.4	111.97	-0.57	-16.72	-7.6	-0.07	-0.11	20.5	0	43	-0.01	0.06	-28	620	43	-32
2022/11/25	0.15	0.59	1.82	-0.57	18.97	12.38	-1.71	-0.43	45.5	0	56	0.01	0.01	-162	544	-141	-25
2022/11/28	-0.51	-0.03	-158.02	-62.18	-42.54	-23.14	-0.44	0.11	-15.5	0	21	0.03	0.01	42	623	-58	-49
2022/11/29	0.96	2.57	-27.91	-6.31	115.18	71.2	-0.16	-0.06	58.5	0	39	0.04	0.02	54	580	38	62
2022/11/30	-0.57	3.44	41.59	122.48	4.62	1.59	2.4	-0.3	-13	89.8	39	-0.02	-0.04	37	604	-69	36
2022/12/01	-0.17	0.53	93.26	-3.54	41.73	14.13	1.45	-0.14	-61	-0.2	26	-0.06	0.01	118	593	0	39
2022/12/02	-0.38	2.45	39.09	-4.87	-23.82	-9.33	-1.31	-0.61	28	0	43	-0.07	0.01	-309	529	-93	4
2022/12/05	-3.29	-0.36	-81.78	-72.86	75.93	55.67	-2.89	-0.6	-385	0	44	-0.01	-0.01	93	581	189	-92
2022/12/06	-0.19	0.38	-104.42	-57.58	21.32	0.72	-3.33	-0.25	-6	0	66	-0.07	-0.09	121	671	-90	80
2022/12/07	-1.57	0.38	-82	-7.34	-9.76	-12.91	-2.18	0.44	-27.5	0	69	0.03	-0.01	-67	598	27	-55
2022/12/08	-0.15	0.6	3.37	29.59	0.74	-2.27	-1.02	0.13	40.5	0	68	-0.04	0	-45	590	60	10
2022/12/09	1.5	-0.83	106.16	-29.13	39.06	9.6	-0.05	0.37	46	0	73	0	0.03	-227	592	-147	-126
2022/12/12	0.9	2.33	-64.09	56.18	-44.8	-27.91	1.89	0.21	62	0	82	0	-0.03	169	493	48	-4
2022/12/13	1.79	-1.53	191.26	29.09	-7.76	-2.71	2.69	0.45	8	0	98	0.01	0.03	-242	495	16	15
2022/12/14	0.67	-2.03	-37.69	-24.33	9.21	0.2	2.02	-0.61	46.5	0	73	-0.02	0.04	-76	477	-104	-28
2022/12/15	-0.25	-1.11	-473.97	-99.57	-2.9	-7.88	-1.49	0.51	13	0	82	-0.02	0.02	234	388	147	-36
2022/12/16	0.73	-1.68	-93.16	-43.39	2.24	-0.79	-2.17	-0.26	-28.5	34.2	106	0.05	0.01	-196	569	45	210
2022/12/19	0.06	0.29	49.8	-34.7	-61.01	-60.74	0.78	-0.77	-113.5	0	63	-0.01	-0.03	-207	451	-375	-234
2022/12/20	-0.26	3.07	-58.21	3.96	-64.2	-33.35	0.17	-0.49	-14	0	79	0.02	0.02	-87	412	-55	-7
2022/12/21	0.15	-2.3	213.16	56.82	1.52	-5.36	2.21	0.13	67	0	120	-0.02	-0.01	-52	440	19	16
2022/12/22	-0.61	1.36	-183.75	-56.05	5.49	-13.98	-1.22	-0.42	-73	0	67	0	0	126	379	-40	-74
2022/12/23	1.06	0.09	26.86	22.43	-7.81	-8.56	2.94	-0.04	4	0	63	0.01	0	-372	394	-69	-91
2022/12/26	-0.69	-0.48	0	-7.78	15.27	19.69	0.21	0	59	0	100	0	0.01	281	414	137	4
2022/12/27	-0.01	-0.48	54.17	-7.79	44.36	30.01	0.2	0.07	29	0	125	-0.03	-0.01	-61	422	-179	10
2022/12/28	0.05	-2.23	-69.5	-46.03	-16.59	-8.17	-1.07	-0.32	-42.5	0	166	0.02	0.01	-34	423	42	45
2022/12/29	0.22	-1.55	146.12	66.06	-14.56	-13.7	-1	-0.21	-14	0	158	0.01	0.01	-43	421	179	-53
2022/12/30	-0.03	-0.52	-148.13	-9.78	14.93	15.56	3.65	-0.13	-6.5	-101.8	127	-0.02	0	-47	440	-157	-38
2023/01/03	-0.19	-0.35	258.08	-15.36	16.27	27.25	-3.81	-0.76	-38	0	239	-0.01	-0.01	107	499	-121	156
2023/01/04	-0.02	-5.63	309.11	28.83	5.05	7.01	-4.26	0.1	-56.5	0	120	-0.04	-0.12	23	589	120	82
2023/01/05	0	1.12	-54.47	-44.87	75.63	31.7	0.85	-0.3	21	0	93	-0.02	0.03	56	492	22	-69
2023/01/06	-0.16	-1.46	173.71	86.98	12.31	2.42	-0.12	-0.02	32	0	201	0	-0.07	29	500	-28	25
2023/01/09	0.21	4	182.81	-2.99	32.23	18.44	1.08	0.09	34.5	0	186	-0.06	0.02	32	498	-118	16
2023/01/10	-0.1	-1	-18.23	27.16	4.35	-6.57	0.45	-0.28	-14.5	-125.4	209	-0.07	-0.02	127	479	74	17
2023/01/11	-0.03	-1.58	173.31	50.36	-7.44	-7.67	2.57	0.12	39.5	0	116	0.02	0.02	-71	450	-75	-29
2023/01/12	-0.1	1.24	110.39	13.56	7.84	1.61	1.36	-0.03	-27.5	0	88	-0.01	0.02	147	500	32	18
2023/01/13	0.17	-0.36	28.22	15.92	56.51	31.86	1.25	-0.12	33	0	68	-0.04	0.02	130	439	19	-37
2023/01/16	0.13	-2.26	47.52	-4.06	63.58	32.28	-0.82	0.07	-20	0	41	-0.02	-0.04	-711	419	-292	-102
2023/01/17	-1.02	2	53.03	-4.06	-0.72	-3.35	1.46	0	-10.5	0	55	0.01	0.01	-54	384	-110	22
2023/01/18	0.69	3.69	-5.27	-62.11	-6.93	0.17	-0.94	-0.2	34.5	0	77	0.04	0.01	-121	379	-27	-88
2023/01/19	0	0.62	-261.44	-30.01	25.7	15.87	1.18	-0.02	4	0	79	0.01	0.01	-155	314	-87	-44
2023/01/20	0.07	1.18	113.2	73.76	25.52	24.53	1.47	-0.05	-10	0	89	0	0.04	-107	251	-38	-61
2023/01/30	4.69	4.25	92.52	45.16	19.82	4.51	-2.73	-0.34	-19	0	102	-0.01	0.01	637	549	452	316
2023/01/31	-1.94	3.52	2.19	58.83	-44.49	-13.65	-0.41	0.03	-34.5	0	74	0	-0.01	29	581	16	37
2023/02/01	0	2.33	52.47	42.61	39.07	29.25	-1.65	-0.22	-44	0	133	-0.01	-0.01	-3	530	-10	22
2023/02/02	-0.58	-2.4	328.45	60.55	-14.78	0.75	-0.67	-0.05	12	0	65	-0.04	0.06	22	527	131	-9
2023/02/03	0.14	0.26	-32.76	-43.28	-39.52	-22.26	-2.23	-0.06	11.5	0	62	0.03	-0.04	-16	538	-79	-14
2023/02/06	-0.34	-2.37	-130.52	-25.4	-54.75	-24.71	1.05	0.11	23.5	0	159	0.03	-0.04	-2	584	71	33
2023/02/07	0	-0.55	-25.03	52.92	7.35	9.39	2.7	0.09	-7	0	111	0.03	-0.02	21	604	140	30
2023/02/08	0	-0.01	91.17	-46.14	-18.09	-15.98	1.4	-0.17	15	5.4	53	-0.02	-0.02	-2	626	21	103
2023/02/09	-0.82	0.7	111.37	-36.36	54.72	38.27	-0.59	0.04	2	0	45	0.01	0.01	13	651	16	-61
2023/02/10	0.79	2.01	-215.44	8.96	-24.55	-9.71	1.89	0.12	-5.5	0	43	0	0.01	-33	608	-136	-91
2023/02/13	-1.18	-0.8	89.36	46.83	37.26	23.49	0.22	-0.15	-51	0	29	0.03	-0.02	84	685	104	122
2023/02/14	-0.38	-0.15	-16.78	-1.16	1.72	9.12	-1.03	0.17	24	0	54	-0.01	0.04	-15	567	-14	-62
2023/02/15	-0.41	2.22	125.78	11.47	-21.6	-12.79	-0.2	-0.13	12	0	85	0.01	0.01	137	663	54	114
2023/02/16	-0.2	3.11	27.3	-57.19	-30.2	-31.46	-0.24	-0.08	40.5	0	90	0.03	0	-19	616	42	7
2023/02/17	0.57	-1.27	-51.64	-11.32	-58.98	-25.01	-2.14	-0.13	31.5	0	98	0.02	0	-20	563	-78	-98
2023/02/20	-0.4	2.03	-4.45	-40.87	98.98	66.32	1.07	-0.03	28	0	75	-0.01	0.01	157	638	187	150
2023/02/21	-0.45	1.92	-79.93	-40.88	10.86	16.18	-1.02	-0.04	50	0	69	0	0	-94	688	-64	-53
2023/02/22	0.32	-3.5	2.27	-6.29	-37.4	-15.37	-2.45	0.11	-15	0	54	0.02	-0.01	63	732	13	235
2023/02/24	-0.3	0.52	-190.15	-21.01	-45.9	-23.99	2.56	0.29	89.5	0	58	0.01	-0.01	-137	632	-40	-190
2023/02/27	0.43	2.75	171.69	12.2	-17.21	-9.13	-0.71	0.13	14.5	0	56	0.07	0.03	176	598	-10	78
2023/02/28	3.36	-0.27	-16.29	-12.09	25.62	21.58	1.44	0.06	-50.5	0	86	-0.01	0.03	31	671	-51	27
2023/03/01	-3.46	-2.86	-60.12	-18.76	57.48	32.74	0.42	0.03	20	0	139	-0.01	-0.03	-62	718	-10	62
2023/03/02	-0.86	-3.49	22.62	29.96	-9.2	-1.7	0.44	-0.02	-15.5	0	124	-0.06	0	84	653	51	183
2023/03/03	0.49	-1.16	162.97	64.29	12.81	17.74	1.08	0.23	-14	0	101	0.03	-0.01	-211	655	-92	-289
2023/03/06	0.04	0.83	162.97	2.78	-21.54	-6.36	0.35	-0.41	-24	0	72	-0.01	0	113	624	77	54
2023/03/07	-0.15	2.69	-94.05	-62.05	-60.16	-36.93	-2.89	0.05	-6.5	0	93	0.02	0.06	161	634	-19	-40
2023/03/08	0.11	2.11	72.34	5.64	-14.74	-1.85	-0.63	-0.07	10.5	0.4	95	0.03	-0.05	-193	677	-45	-83
2023/03/09	-0.07	0.61	1.34	-73.69	-14.26	-7.16	-1.07	-0.1	-18	0	67	0.02	0.01	233	739	78	108
2023/03/10	-0.07	1.41	-205.24	-56.73	-52.71	-46.01	1.19	-0.05	-10.5	0	78	0	0.02	-166	640	-11	-131
2023/03/13	0.04	-2.46	-468.5	-5.83	41.55	38.62	-2.01	0.19	65	0	65	-0.03	0.05	194	699	57	180
2023/03/14	0.09	-4.46	273.36	63.53	-23.99	-23.39	-3.32	-0.06	-52.5	0	67	-0.05	-0.02	85	704	-11	16
2023/03/15	-0.29	-3.2	-497.57	-27.36	2.2	18	-3.76	-0.1	-55	0	99	-0.02	-0.03	-253	668	-22	-153
2023/03/16	0.1	-2.17	231.84	68.35	-47.75	-36.42	1.01	0.06	-59.5	0	106	0.04	-0.05	295	701	-34	80
2023/03/17	0.16	0.15	-198.9	-43.64	19.67	23.66	-1.73	-0.18	21	0	20	0	0.01	-231	638	-45	-132
2023/03/20	-0.47	0.53	165.18	34.93	-19.74	-15.64	0.82	-0.1	-11	0	47	-0.04	0.01	30	623	123	15
2023/03/21	0.26	1.77	261.96	51.3	43.3	20.74	1.53	0.08	-51.5	0	38	0.01	0.03	-30	658	-51	149
2023/03/22	-0.05	-0.11	20.85	-65.9	17.06	10.1	1.37	-0.11	26	0	56	-0.01	0.03	-10	694	0	-64
2023/03/23	0	2.92	-5.8	11.75	39.65	20.9	-0.78	0.06	-19.5	0	72	0	0.07	62	690	18	-37
2023/03/24	-0.2	-4.59	-253.16	22.27	-12.04	-21	-0.92	0.04	40	0	106	-0.03	-0.06	-69	654	-82	-49
2023/03/27	0.18	-0.33	170.45	6.54	-14.57	-14.25	3.13	-0.1	-14.5	0	90	0.03	-0.01	202	679	104	73
2023/03/28	-0.3	2.11	14.34	-6.26	-12.97	-6.02	0.53	-0.06	-26.5	0	93	0	0.03	-61	721	47	72
2023/03/29	0.41	0.93	186.76	56.54	6.63	-5.32	-0.37	0.02	15	0	101	0.01	0.03	127	737	-78	-155
2023/03/30	-0.29	0.69	193.62	23.02	32.39	21.19	0.99	-0.08	1	0	79	0.01	0.01	140	806	68	57
2023/03/31	0.82	0.98	106.44	58.48	12.4	11.61	0.5	0.07	26.5	0	75	-0.02	0.02	-322	690	-102	-93
2023/04/03	-0.19	3.76	-47.92	15.2	39.64	23.54	5.16	-0.05	-80.5	0	72.8	0.01	-0.05	39	593	-4	-1
2023/04/04	-0.43	-0.78	22.55	-23.91	12.54	16.16	0.01	-0.03	-22	0	70.5	-0.01	0.05	-132	639	-30	-90
2023/04/06	-0.1	1.69	-5.58	4.42	-6.47	0.07	0.18	-0.05	-17.5	0	68.3	0	0.01	63	701	50	61
2023/04/07	1.25	-0.07	0	2.05	26.64	15.02	-0.47	0.07	28	0	66	0.01	0.01	380	655	265	-23
2023/04/10	-1.31	-0.07	28.64	2.04	-18.47	-12.29	-0.47	0.07	-71.5	0	63.8	0	-0.01	-153	678	-198	106
2023/04/11	-0.14	0.73	28.64	-0.17	-4.66	-1.79	1.43	0.04	29.5	0	61.5	0.01	-0.01	117	698	27	-9
2023/04/12	-0.1	-1.44	48.43	-16.99	-2.86	13.61	1.72	-0.14	-166.5	0	59.3	0	0.03	-104	705	-102	31
2023/04/13	-0.01	-1.45	25.86	54.27	-28.31	-8.82	-1.24	-0.07	-21.5	0	57	-0.02	0.03	-159	758	47	-99
2023/04/14	0.01	-0.57	78.04	-8.58	23.02	19.79	0.22	0.1	12.5	0	54.8	-0.01	0.03	-245	620	-61	-20
2023/04/17	-0.31	-0.72	-17.97	13.68	57.38	47.46	-1.55	0.19	23.5	0	52.5	0.01	-0.03	202	663	-25	160
2023/04/18	-0.49	2.26	93.14	3.55	12.65	7.72	0.01	0.08	21	0	50.3	0.01	-0.03	-9	656	92	6
2023/04/19	0.99	-0.86	12.53	-0.35	-37.47	-23.2	-1.65	-0.2	-11.5	0	48	-0.01	0.02	-27	633	-71	362
2023/04/20	-0.49	-2.46	-99.23	-24.73	-11.54	-3.1	-2.02	0.01	-58	0	45.8	0.03	0.01	-13	722	-15	-437
2023/04/21	0.6	-2.24	85.69	3.73	-80.45	-65.77	0.56	0.03	-39	0	43.5	-0.02	-0.01	-157	641	-71	-108
2023/04/24	-0.11	-1.32	-17.71	3.52	-49.93	-25.85	1.07	0.24	0.5	0	41.3	0	0.02	211	636	158	106
2023/04/25	0.53	-1.35	8.18	-65.41	-19.97	-10.54	-1.96	-0.07	-13.5	0	39	0	0.05	-70	652	-46	13
2023/04/26	-0.27	-1.29	-76.4	-15.64	-3.44	-0.77	-3.08	-0.08	-31	0	36.8	0.04	-0.01	-11	675	-3	-41
2023/04/27	0.51	0.5	4.72	79.36	29.19	21.78	0.68	0.04	-26	0	34.5	0	0.04	-39	648	-71	-132
2023/04/28	-0.57	1.3	121.93	34.13	40.67	37.39	1.17	0.05	-31.5	0	32.3	0	0	-522	533	-137	-28
2023/05/04	-0.02	-2.53	-188.14	-108.26	1.16	27.19	-7.04	-0.31	-59.5	0	30	-0.01	0.01	168	558	36	43
2023/05/05	0.25	0.29	226.78	75.03	-13.37	-15.96	2.8	0.02	26.5	0	25	0	-0.03	222	530	140	-42
2023/05/08	-0.42	0.42	-8.19	1.87	45.78	60.5	1.71	0.14	60.5	0	46	0.01	0	126	633	-32	122
2023/05/09	0	1.37	2.65	-18.95	-34.78	-37.33	0.43	0.01	-61	0	47	0.01	-0.01	49	608	-11	58
2023/05/10	-0.02	2.66	-59.25	18.47	-31.01	-38.52	-1.03	-0.08	0	0	38	0	-0.01	-66	563	11	-68
2023/05/11	0.11	-1.09	-61.32	-7.02	-6.21	-9.6	-1.43	0.01	-14	0	49	-0.02	-0.01	-77	591	-11	-20
2023/05/12	0.09	0.09	78.91	-6.54	-52.9	-37.19	-0.81	0.09	14.5	0	57	0.04	0	505	588	-26	1
2023/05/15	0.11	-1.45	3.42	12.2	61.13	38.38	1.06	0.09	36.5	0	61	0.02	-0.03	143	555	100	-12
2023/05/16	0.06	1.6	-19.31	-26.38	-20.68	-19.75	-0.32	-0.01	-5.5	0	65	-0.02	0	-79	599	-82	-54
2023/05/17	-0.02	-0.39	53.37	48.87	-18.04	-6.76	2.05	0.02	45	0	27	0.02	0.02	239	717	44	90
2023/05/18	1.11	1.66	212.06	39.28	-4.1	13.09	-1.1	0.24	-21.5	0	59	0.03	0.01	-66	629	-30	-76
2023/05/19	-1.45	0.03	112.02	-6.07	-11.53	-13.78	-0.28	-0.03	-61.5	0	65	0.04	-0.01	-498	567	-70	-20
2023/05/22	0.01	-2.11	-51.39	0.65	24.79	12.93	0.41	-0.19	-33.5	0	51	-0.02	0.01	-160	495	-103	-75
2023/05/23	-0.01	-2.24	-71.13	-47.05	-56.14	-50.23	0.85	0.11	14	0	59	0.01	0.01	154	538	69	98
2023/05/24	0.01	-0.36	-310.73	-30.34	-54.1	-41.49	1.52	0.06	-18	0	41	0.03	0	193	589	163	117
2023/05/25	0	-2.11	-48.33	36.04	-8.59	-3.49	-2.1	-0.1	-40.5	0	48	-0.01	-0.02	554	616	-56	-26
2023/05/26	-0.01	-0.65	190.17	54.17	0.45	11.24	0.69	-0.05	-4	0	31	0.03	0.01	-109	546	-91	-31
2023/05/29	-0.04	0.61	-31.24	0.04	-17.01	8.95	0.12	-0.06	-10	0	37	-0.02	-0.02	-420	560	138	-21
2023/05/30	0.02	-2.29	-43.82	0.03	3.81	2.76	-3.53	-0.05	-31	0	29	0.02	0.01	-49	605	20	55
2023/05/31	-0.52	0.59	-244.89	-25.69	-39.21	-19.65	-0.88	-0.06	5.5	0	29	0	0.02	132	601	-45	-42
2023/06/01	0.49	-2.22	189.64	41.19	8.33	0.07	1.62	-0.09	31.5	0	29.2	0.02	-0.01	-123	601	48	-62
2023/06/02	0.82	0.28	197.57	61.35	54.96	25.44	1.85	0.02	17	0	29.5	-0.01	0.04	-173	590	-98	51
2023/06/05	-0.78	3.5	-87.34	-8.58	-17.58	2.37	0.58	0.09	-14.5	0	29.7	0	-0.04	407	632	471	68
2023/06/06	0.21	-0.82	28.55	10.06	-36.09	-37.1	-0.42	-0.01	12	0	29.9	0.02	0.02	-271	566	-229	-21
2023/06/07	-0.26	1.87	-31.88	-16.33	-18.82	2.42	0.66	0.07	-3.5	0	30.2	0.01	0	162	637	-146	-34
2023/06/08	-0.39	0.38	29.4	26.41	30.85	15.83	-0.99	-0.01	-2	0	30.4	0.01	0.02	-225	637	42	4
2023/06/09	0.46	2.74	-40.12	4.93	16.51	17.82	-1.17	-0.06	21	0	30.6	-0.02	0.04	-24	600	-90	50
2023/06/12	-0.11	1.02	148.03	40.07	7.73	-2.58	-2.95	0.02	-11.5	0	30.9	0.01	-0.02	-80	629	-15	-81
2023/06/13	-0.01	2.05	132.81	30.08	20.48	4.84	2.45	0.05	46	0	31.1	0.03	0.05	-20	600	36	-25
2023/06/14	0.07	3.42	80.11	3.58	-0.89	-4.68	-1.09	0.02	13.5	0	31.3	0.01	0.02	-71	557	6	-8
2023/06/15	0.02	-0.09	-20.67	53.25	61.48	23.99	2.47	0.21	42.5	0	31.6	-0.01	0.03	-90	537	-43	22
2023/06/16	-0.12	-0.93	67.51	-16.25	37.85	20.35	0.94	0.06	21	0	31.8	-0.02	0.05	-262	541	-90	-127
2023/06/20	-0.03	2.42	-246.31	-20.88	-39.11	-32.97	-0.71	-0.13	-43	0	32	0.03	0.02	-39	531	68	67
2023/06/21	0	-4.27	-88.19	-23.02	-60.21	-42.46	1.22	0.1	-5	0	32.3	0.02	0.02	-164	465	-77	-68
2023/06/26	0.58	-4.25	-210.07	-36.87	-54.33	-47.28	-2.94	0.28	-59.5	0	32.5	0.03	0.02	183	528	59	75
2023/06/27	-1.38	2.57	33.8	49.59	35.73	38.82	-1.92	-0.06	40	0	32.8	0	0.02	-16	586	-37	-10
2023/06/28	0.78	-1.09	102.14	-1.55	-4.63	-0.06	1.77	-0.15	-7.5	0	33	0	0.02	146	548	10	-22
2023/06/29	0.01	0.16	-2.28	19.58	-18.96	-7	0.31	0.02	2.5	0	33.2	0.01	0.02	-90	639	43	14
2023/06/30	-0.15	1.23	201.18	53.94	20.61	19.68	0.56	0.09	23	0	33.5	0.01	-0.04	-168	553	-135	-124
2023/07/03	0.29	-1.7	-66.86	5.21	50.43	41.92	-0.25	-0.07	-20	0	33.7	-0.01	0.02	59	519	-39	110
2023/07/04	-0.29	-0.02	-41.87	-4.38	6.13	1.37	1.6	0.05	-15	0	33.9	-0.02	-0.01	-54	581	-108	17
2023/07/05	-0.17	-1.37	-101.59	-4.39	-30.2	-22.4	0.4	-0.09	-6.5	0	34.2	0	-0.04	49	597	106	-1
2023/07/06	-0.44	0.17	-409.04	-35.23	-26.06	-17.38	-0.13	-0.02	28.5	0	34.4	0.01	0.01	-58	503	-8	38
2023/07/07	0.15	0.19	74.86	-12.64	-17.05	-8.96	1.95	-0.08	-27	0	34.6	0	0.03	-48	495	82	-15
2023/07/10	0.48	0.16	69.76	10.58	18.63	7.09	-0.78	0.11	5.5	0	34.9	-0.02	0.01	150	543	346	-55
2023/07/11	0.27	0.47	117.18	29.73	25.16	17.67	1.71	0.06	43.5	0	35.1	0	0.04	160	608	25	87
2023/07/12	-0.45	-0.91	232.66	32.9	-26.05	-25.24	0.71	-0.07	31.5	0	35.3	-0.01	-0.02	192	675	-95	35
2023/07/13	0.08	0.03	118.03	37.88	54.98	40.35	1.25	-0.1	4	0	35.6	-0.03	0.05	-284	676	-165	-72
2023/07/14	2.51	0.2	-35.96	-4.62	0.68	1.22	-1.49	-0.01	30	0	35.8	-0.02	0.05	32	591	40	70
2023/07/17	-1.09	0.48	-36.42	17.37	-31.93	-28.07	-1.37	-0.01	-35	0	36	0	0	-155	722	-30	-12
2023/07/18	-0.73	0.86	56.84	32.19	-12.23	-11.81	1.13	0.08	84	0	36.3	0.02	0.04	-91	646	-4	-96
2023/07/19	-0.42	1.83	-16.56	10.74	-4.07	1.02	-0.17	0.01	12.5	0	36.5	0	0	104	655	-3	77
2023/07/20	-0.05	1.31	95.29	-30.85	-27.18	-29.32	0.18	0.12	47	0	36.7	0	0.03	-31	648	25	-82
2023/07/21	0.18	0.87	-27	1.47	-1.78	-1.77	1.43	-0.03	-32.5	0	37	0	-0.09	-140	575	-206	-33
2023/07/24	-0.01	-0.29	13.73	18.3	-16.69	-3.59	1.67	-0.01	-29	0	37.2	0	-0.01	33	541	-77	50
2023/07/25	-0.15	0.8	20.64	12.82	109.9	67.36	0.9	0.02	11.5	0	37.4	-0.01	-0.03	10	552	-20	-21
2023/07/26	0	-1.06	-80.13	-0.71	-8.11	-8.49	-0.72	-0.05	46	0	37.7	-0.01	-0.07	-57	496	60	72
2023/07/27	-0.03	0.26	274.57	-29.34	-4.66	-6.36	1.32	-0.08	-36	0	37.9	0	0.03	43	512	-26	-139
2023/07/28	0.03	-2.33	63.72	44.82	90.39	59.26	0.75	0.04	-9	0	38.1	0	-0.06	-120	480	-92	108
2023/07/31	-0.02	-1.96	-22.92	6.73	21.89	15.11	0.57	0	-23	0	38.4	0	0.02	-44	497	-101	-111
2023/08/01	-0.8	-1.51	-206.43	-12.23	-16.63	-0.09	-0.65	-0.06	38.5	0	38.6	0	-0.02	57	517	-48	33
2023/08/02	0.6	-1.59	-220.38	-63.34	-28.1	-29.26	-1.71	-0.09	14	0	38.8	0.01	0.02	7	566	99	86
2023/08/03	0.2	1.34	-126.64	-11.5	35.08	18.77	1.94	0.07	-71	0	39.1	0.01	-0.02	-115	541	-58	-80
2023/08/04	-0.05	-1.12	58.48	-23.86	15.6	7.62	1.1	0.02	26.5	0	39.3	-0.01	0	-14	500	16	-52
2023/08/07	-0.4	-0.94	-1.1	40.41	-30.43	-19.25	-0.9	0.16	17.5	0	39.5	0	0.02	208	565	-16	30
2023/08/08	0.24	1.68	-175.83	-19.06	-10.42	-8.21	0.83	0.06	-22.5	0	39.8	0.02	0.01	-57	556	-27	-4
2023/08/09	0.11	-0.37	77.65	-31.67	-12.16	-16.13	1.38	0.17	-85.5	0	40	0	0.01	38	537	82	-8
2023/08/10	0.12	0.96	143.94	1.12	8.15	10.07	-1.15	-0.18	-6	0	40.3	0	0	-83	594	11	-37
2023/08/11	0.68	1.82	-164.35	-4.78	-91.47	-65.31	0.41	0	35.5	0	40.5	0	0.02	-7	545	-48	1
2023/08/14	-0.86	1	72.08	25.67	-28.34	-10.82	-0.6	0.02	-29.5	0	40.7	0.01	-0.02	65	516	102	83
2023/08/15	-0.21	-0.61	-136.97	-51.86	-9.37	-2.25	-1.32	-0.15	20.5	0	41	0.01	0	-18	546	44	-33
2023/08/16	0.15	1.33	22.17	-33.53	-28.21	-26.05	-1.44	-0.05	-33	0	41.2	0.02	0.02	49	530	-2	6
2023/08/17	1.41	0.37	-112.55	-33.97	12.77	13.61	0.67	0.01	35	0	41.4	0.01	0	-60	563	-90	-12
2023/08/18	-1.12	-0.8	-102.64	-0.65	-47.1	-31.79	0.68	-0.05	12	0	41.7	-0.01	-0.01	-65	469	42	-6
2023/08/21	-0.17	-0.13	29.02	30.06	-54.44	-38.97	-0.34	0.05	28	0	41.9	0	0	59	540	-63	39
2023/08/22	0.94	1.98	102.34	-12.22	28.67	27.35	-0.43	-0.06	48	0	42.1	0	0.03	-99	485	22	-75
2023/08/23	-1.15	-1.6	22.79	48.46	-61.6	-41.93	-0.82	-0.08	31	0	42.4	0	-0.04	65	552	-46	79
2023/08/24	-0.24	-2.34	-106.92	-59.7	26.8	3.84	0.15	0.15	-21.5	0	42.6	-0.01	-0.01	69	465	91	-21
2023/08/25	-0.05	-0.42	10.33	29.4	-14.28	-18.17	1.12	0.04	9.5	0	42.8	0	-0.04	-102	429	-25	-46
2023/08/28	-0.21	0.32	160.79	27.6	43.47	34.57	-0.06	0.01	-12	0	43.1	0	-0.01	103	495	250	54
2023/08/29	0.01	-0.85	138.27	64.32	37.49	37.25	1.07	0	-31	0	43.3	0	0.02	43	579	32	-26
2023/08/30	-0.02	1.43	-38.95	17.24	-1.6	1.25	0.37	0.13	53.5	0	43.5	-0.01	0.04	65	501	25	30
2023/08/31	-0.97	-0.44	55.15	-7.21	-23.24	-17.26	1	-0.05	17	0	43.8	0	0.03	-57	549	-92	5
2023/09/01	0.04	-0.48	-106.74	8.11	26.22	13.37	1.69	0	89.5	0	44	0	-0.05	-223	513	-272	-118
2023/09/04	0.22	-1.06	-15.49	-9.47	57.46	43.81	0.45	-0.09	49	0	48	0	-0.07	256	582	266	239
2023/09/05	-0.27	-0.31	-53.14	-9.47	-28.63	-22.69	1.04	-0.08	38.5	0	37	0	0	101	857	10	52
2023/09/06	-0.99	-0.17	-30.34	-31.35	-8.29	3.71	0.56	-0.07	12.5	0	32	0.02	0	-106	986	-136	-110
2023/09/07	0.38	-0.7	-22.71	-14.34	-53.56	-35.73	-0.68	0.06	-21.5	0	36	0	0	187	2996	81	23
2023/09/08	0.61	-1.38	21.64	6.35	-18.48	-5.63	0.73	0.04	-62.5	0	48	0.02	0	282	4774	-158	73
2023/09/11	-1.49	0.12	60.69	29.97	27.55	26.06	-0.01	0	97.5	0	47	-0.01	0	390	1637	237	71
2023/09/12	-0.27	-0.56	-85.46	-25.56	-6.94	-5.72	1.42	0.12	45	0	32	-0.01	-0.01	1244	1590	-22	-78
2023/09/13	0.06	1.91	-61.5	5.54	-23.95	-13.99	-0.18	-0.02	-29.5	0	32	-0.01	-0.01	2550	1372	100	-24
2023/09/14	-0.2	0.1	151.26	37.66	-3.14	3.48	1.82	-0.01	52.5	0	27	0	-0.03	-2626	1335	-101	25
2023/09/15	-0.96	-0.8	88.24	-54.78	-24.73	-8.81	0.23	-0.07	15	0	42	-0.01	-0.07	-1081	1222	27	-121
2023/09/18	0.74	-1.41	-166.41	3.21	18.93	8.19	0.5	0.09	67.5	0	45	-0.01	0.01	-298	1223	34	64
2023/09/19	1.6	0.39	-62.64	-9.58	-7.21	-0.97	-0.09	0.11	-13.5	0	38	0	0.02	-134	1151	49	19
2023/09/20	-1.77	1.56	117.11	-41.75	-14.81	-16.39	-0.81	-0.1	48.5	0	22	0	-0.01	15	1139	-55	-57
2023/09/21	0.89	1.31	-209.73	-72.2	-33.25	-23.87	-0.23	0.1	-82	0	26	0	-0.02	96	1102	58	113
2023/09/22	0.72	1.34	-14.57	-9.94	66.49	47.73	-0.03	0.05	18	0	27	0	0	-170	1005	-9	-7
2023/09/25	0.19	-0.16	-151.8	17.38	-24.33	-16.82	0.02	0.01	-29	0	20	0	-0.01	-170	957	2	-19
2023/09/26	0.33	-2.34	-149.62	-63.91	-21.71	-13.34	0.67	-0.05	-60.5	0	24	0	-0.05	-21	890	-20	68
2023/09/27	-0.55	-0.59	-38.42	0.98	7.61	5.05	2.59	0.04	12.5	0	35	0	0	-36	731	-108	-87
2023/09/28	-0.31	0.39	106.05	25.19	-10.98	3.16	-1.17	0.06	65	0	38	0.01	-0.05	-358	662	-300	-159
2023/10/09	0.67	-0.73	-195.39	35.96	-4.79	-13.56	-7.23	0.43	13	0	28	0	0.04	283	772	404	174
2023/10/10	-2.15	3.03	295.41	22.58	-27.6	-21.68	-0.5	0.02	-128	0	31.4	0	0	30	726	-7	-82
2023/10/18	4.98	-2.88	-328.61	-43.64	-46.55	-16.53	3.85	-0.33	-2.5	0	34.8	0	0.01	4	763	65	30
2023/10/19	-2.93	-0.07	-49.68	-36.6	-77.04	-53.32	0.88	-0.11	-11	0	38.3	0	-0.02	-12	720	-17	-16
2023/10/20	1.11	-0.33	-246.76	-53.84	-22.95	-22.33	-0.22	-0.04	-18.5	0	41.7	0	0.02	-116	539	-153	-11
2023/10/23	-0.85	-0.89	2.25	-7.12	-36.35	-43.77	-2.33	0	-29.5	0	45.1	0	0.01	101	708	142	1
2023/10/24	0.23	0.09	79.22	30.64	12.89	22.95	-1.76	0.41	54.5	0	48.5	0	0.05	-82	668	-53	10
2023/10/25	2.46	-0.65	12.24	-60.91	17.33	11.87	2.06	0.07	69	0	51.9	0	-0.05	67	594	-2	32
2023/10/26	-4.08	-0.26	-161.13	-49.54	9.68	14.19	-2.2	0.12	-10	0	55.3	0	-0.01	27	608	-50	-67
2023/10/27	0.81	-0.3	-43.64	-19.86	48.25	29.48	2.55	-0.08	35	0	58.8	0	-0.01	-114	574	21	-37
2023/10/30	0.24	-0.59	29.13	49.45	21.38	3.77	-3.03	-0.11	18	0	62.2	0	0	111	629	57	20
2023/10/31	-0.34	0.34	93.8	26.98	-11.26	-2.78	-0.04	0.28	-24	0	65.6	0	0.03	10	629	-35	101
2023/11/01	0.87	-0.49	112.93	44.06	-1.48	4.31	-2.78	-0.11	-0.5	0	69	0	-0.01	-27	627	45	8
2023/11/02	0.39	0.1	220.33	79.92	-16.84	-13.67	2.22	0.01	-9	0	60	0	-0.01	-51	552	-103	11
2023/11/03	1.71	-0.96	45.65	40.56	29.95	21.39	-1.96	-0.04	68.5	0	83	0	0.03	-79	568	-37	-86
2023/11/06	-3.08	-1.78	-53.28	7.64	48.47	27.61	0.29	-0.2	20.5	0	25	0	0.07	161	607	223	-34
2023/11/07	0.31	-0.58	16.67	12.4	-12.85	-1.14	-3.57	-0.09	17	0	43	0	-0.01	47	573	413	22
2023/11/08	0.44	0.45	76.96	4.4	-8.69	-4.9	-2.07	-0.06	45.5	0	39	0	-0.01	5	583	-321	-70
2023/11/09	-2.32	1.69	122.94	-35.43	1.76	0.91	0.47	-0.08	7	0	44	0	0	35	618	-97	26
2023/11/10	2.03	1.31	-118.15	67.89	-26.34	-14.31	1.42	-0.02	35	0	56	0	-0.02	-254	598	-49	25
2023/11/13	-0.18	-1.19	110.61	-3.69	-7.08	7.56	1.09	0.21	16	0	55	0	0.01	137	560	109	-27
2023/11/14	-0.05	1.15	269.43	84.15	2.65	9.54	-0.05	-0.13	-10.5	0	65	0	0.01	92	654	44	116
2023/11/15	0.51	1.13	133.74	7.18	25.19	16.76	-1.29	0.05	-15	0	80	0	0.11	-86	588	-84	8
2023/11/16	-0.4	-2.69	38.44	5.36	-34.89	-21.9	-3.76	-0.1	93	0	82	-0.01	-0.02	118	576	233	-123
2023/11/17	-0.65	-0.45	132.55	5.78	-4.29	3.44	3.19	-0.09	-38	0	96	0	0.01	-71	586	-215	8
2023/11/20	-2.11	0.07	-17.83	33.36	8.25	13.95	1.71	-0.08	20	0	74	-0.01	0.02	104	638	50	35
2023/11/21	0.02	-1.23	-0.8	-9.19	4.75	-0.39	0.13	0.12	-59.5	0	68	-0.02	0	41	590	15	32
2023/11/22	0.31	-0.16	57.29	18.43	-36.65	-24.32	-0.49	0.04	23.5	0	76	-0.01	-0.04	-97	664	-75	10
2023/11/23	0.84	1.39	36.91	1.36	17.1	18.25	-0.54	0.03	-13.5	0	73	-0.01	-0.02	4	616	26	-64
2023/11/24	0.22	0.02	34.76	1.36	-23.51	-20.89	-0.84	-0.07	77.5	0	54	0	0	-38	611	-92	6
2023/11/27	-1.78	-2.92	-63.12	-8.91	-26.07	-9.27	-0.6	-0.05	78.5	0	71	0	0.02	-12	623	176	-58
2023/11/28	1.57	-0.67	26.3	4.46	6.58	6.85	1.7	-0.16	-47	0	85	-0.01	0.01	-3	572	-63	42
2023/11/29	1.26	-1.91	173.78	-4.31	-30.21	-16.86	1.42	0	-39	0	76	-0.01	0.02	33	597	-18	46
2023/11/30	-0.21	-0.18	48.98	17.22	7.89	7.98	-0.27	0.02	5	0	45	0	-0.02	-25	598	-69	-44
2023/12/01	-1.06	1.69	182.09	26.83	-13.32	1.97	-3.95	-0.03	26.5	0	40	0.01	-0.04	52	556	4	-25
2023/12/04	0.38	-2.12	7.24	-24.85	-22.74	-8.73	-0.85	-0.08	-121.5	0	86	-0.01	-0.02	875	503	36	11
2023/12/05	-0.31	-1.72	128.35	-2.6	-65.88	-50.61	-0.83	-0.01	-5.5	0	92	0.01	-0.02	-401	558	176	32
2023/12/06	-0.8	0.19	123.33	-17.84	5.34	-3.37	-2.9	-0.12	28.5	0	94	0	-0.03	14	557	237	23
2023/12/07	-0.67	0.85	-27.45	36.25	-8.32	-2.72	-0.25	-0.01	19	0	62	0.01	-0.02	106	574	1130	-93
2023/12/08	0.62	-1.02	130.23	18.78	8.18	3.35	1.79	-0.01	-46.5	0	75	-0.01	0.01	-639	500	-1094	172
2023/12/11	0.3	-1.34	35.21	18.07	19.99	21.88	0.19	-0.11	-34.5	0	20	0.01	-0.01	126	473	-466	-176
2023/12/12	-0.12	0.93	-2.69	21.26	7.35	12	-2.79	-0.16	66	0	42	0	0.01	-251	498	5	-41
2023/12/13	-0.11	0.71	-25.69	63.39	-57.19	-34.68	1.02	0.07	-123.5	0	54	-0.01	0.01	30	503	-44	85
2023/12/14	0.04	-2.1	-13.82	12.46	-17.65	-9.77	2.35	0.07	-17.5	0	14	0	0.05	16	489	26	-103
2023/12/15	0	-0.43	-0.79	-0.36	-10.41	-16.43	-0.06	0.05	26.5	0	28	-0.01	0.06	-158	463	-38	44
2023/12/18	-0.53	2.75	-100.89	21.37	-12.18	-11.76	1.4	0.05	-22	0	37	-0.01	-0.06	148	471	55	44
2023/12/19	-1.02	-0.21	93.86	27.81	4.67	1.59	1.28	0.04	1	0	45	0.01	0.02	-41	482	-54	32
2023/12/20	-1.82	3.7	-11.36	-70.02	-36.54	-30.28	0.47	-0.13	21	0	89	0	0.04	-63	531	-54	9
2023/12/21	-0.33	2.25	-45.63	48.4	33.37	16.6	-0.31	0.15	46	0	65	0	-0.02	120	534	54	-34
2023/12/22	-1.2	0.97	18.76	7.88	6.36	-3.93	-0.32	-0.1	15	0	58	0	0.04	-219	479	-149	-127
2023/12/25	1.51	0	0	10.06	10.22	4.03	1	0	-18	0	90	0	0	49	491	70	8
2023/12/26	0.25	0	17.95	10.06	-22.66	-19.93	1	-0.21	-7.5	0	78	0	0.01	15	462	42	102
2023/12/27	0.86	1.12	17.94	6.83	11.57	15.73	-1.42	0.03	-30	0	172	0	0.02	35	531	-4	13
2023/12/28	1.95	0.22	-40.52	1.77	78.18	40.09	-1.26	0.07	-34	0	235	0	0.04	32	504	-69	-78
2023/12/29	1.64	0.12	50.09	-13.52	16.57	20.23	-1.35	-0.06	8.5	0	257	-0.02	-0.03	-264	413	-106	-54
2024/01/02	-0.66	-4.08	17.72	-27	-44.76	-12.65	-1.15	0.08	42.5	0	117	0	-0.04	77	424	137	79
2024/01/03	-2.25	1.4	-230.97	-38.02	-8.05	4.97	2.36	0.08	43	0	71	0.02	-0.04	141	537	-6	6
2024/01/04	2.2	-1.52	78.9	-16.13	-31.25	-12.9	-0.66	0.11	-87.5	0	72	0	0	-59	580	73	7
2024/01/05	-2.33	0.51	-23.08	8.56	-17.94	-25.17	1.17	0.03	-39.5	0	86	0	0.01	-146	529	-144	11
2024/01/08	-0.33	-3.82	122.26	66.3	-43.05	-41.64	-2.64	-0.05	-59.5	0	176	0	-0.01	112	559	56	60
2024/01/09	0.47	-0.44	-28.11	-7.04	6.44	5.71	1.47	0.14	0	0	153	0	0.01	-98	479	-138	-38
2024/01/10	-0.74	-1.91	1.45	26.95	-15.37	-15.55	-0.79	-0.15	-27.5	0	134	0.01	-0.01	-160	552	29	-44
2024/01/11	0	-1.97	-142.78	-3.21	18.54	8.95	0.61	0.01	44.5	0	132	0	0.03	177	522	43	-60
2024/01/12	1.02	-1.98	157.53	3.59	-11.5	-4.67	0.88	0.06	-15	0	126	0	0	-3	550	14	11
2024/01/15	0.02	1.41	-82.34	-8.92	-3.25	4.31	-0.14	-0.11	7.5	0	123.62	0	-0.01	35	596	-65	73
2024/01/16	-0.56	-1.61	-50.54	-8.93	19.96	7.7	0.14	-0.07	2.5	0	121.24	0	0	-89	556	-150	-87
2024/01/17	1.25	-2.39	-139.99	-26.77	-71.8	-60.37	-0.41	0.04	-22	0	118.86	0.01	-0.03	-13	501	114	29
2024/01/18	-0.3	-0.16	135.66	41.73	45.65	12.16	1.22	-0.06	40	0	116.48	0	0	37	460	-33	-5
2024/01/19	-0.58	0.61	-12.22	58.87	-4.95	-13.5	-0.54	-0.18	6	0	114.1	0	-0.01	-79	465	-42	-5
2024/01/22	-1.96	-1.51	128.23	10.62	-50.88	-75.94	1.5	-0.11	-10	0	111.72	-0.01	0.01	79	542	-164	-26
2024/01/23	2.4	0.99	-56.27	14.17	13.03	14.64	-0.51	0.06	14	0	109.34	0	-0.01	-62	621	202	103
2024/01/24	-2.29	2.7	262.83	3.95	45.18	49.79	0.49	0.1	26.5	0	106.97	0	-0.02	6	543	-7	-61
2024/01/25	1.82	-2.51	17	25.61	65.81	85.34	2.39	-0.1	-18	0	104.59	-0.01	0	-55	457	-53	-11
2024/01/26	0	0.39	54.47	-3.19	-9.1	4.11	1.12	-0.01	-56.5	0	102.21	0.01	-0.01	25	455	-15	30
2024/01/29	-0.88	-1.76	-19.68	36.96	-29.86	-26.86	-1.15	-0.12	1.5	0	99.83	0	-0.01	-88	431	-73	-33
2024/01/30	1.65	1.73	30.63	-2.96	-58.92	-52.83	0.47	0.03	-29	0	97.45	0	0	21	421	34	-44
2024/01/31	-1.61	0.63	-68.58	-79.32	-29.69	-41.98	-1.16	0.04	-47	0	95.07	-0.01	0	-90	433	-35	5
2024/02/01	0.93	-1.88	-44.72	60.54	2.36	-17.81	-3.01	-0.08	22	0	92.69	0	-0.02	-32	464	-16	5
2024/02/02	-1.59	1.19	59.17	52.42	-38.08	-40.59	-1.37	0.04	-17.5	0	90.31	0	0.03	-109	388	-162	-72
2024/02/05	2.34	-0.72	-14.15	-15.8	20.79	-27.96	0.66	-0.02	-0.5	0	87.93	0.01	-0.05	-71	597	3	-27
2024/02/06	-1.42	0.89	129.18	11.42	111.27	87.3	0.6	-0.07	7	0	85.55	0	-0.01	10	410	50	10
2024/02/07	-0.27	-1.14	-111.28	40.83	31.94	40.21	0.62	-0.03	-14.5	0	83.17	-0.01	-0.01	-82	374	-93	-35
2024/02/08	0.67	-1.59	41.87	2.85	21.3	36.2	2.42	-0.08	45.5	0	80.79	0.01	0.02	-237	296	-113	-87
2024/02/19	-0.51	-6.95	128.43	-11.2	38.88	44.64	1.93	-0.33	-99	0	78.41	-0.01	0	863	513	315	180
2024/02/20	0.77	0.75	-23.83	-11.2	7.04	12.19	-1.22	0.14	-0.5	0	76.03	0.01	0	-35	510	-36	89
2024/02/21	-0.48	0.25	49.69	6.29	46.02	28.23	0.69	0.08	102	0	73.66	-0.01	0.02	-13	549	-41	64
2024/02/22	0.52	-1.73	252.33	105.23	29.8	37.4	0.64	0.04	45	0	71.28	0	0.01	1	600	108	-37
2024/02/23	-2.4	-0.53	48.88	1.77	3.07	16.52	-2.05	-0.13	-27.5	0	68.9	0.01	0	-66	542	-59	-119
2024/02/26	2.3	1.71	3.9	-19.27	-36.38	-27.86	0.91	0.07	-63.5	0	66.52	0	0.01	196	689	245	136
2024/02/27	-2.12	1.69	133.26	8.65	41.43	38.46	1.12	0.06	67.5	0	64.14	0	0.01	-17	773	72	51
2024/02/28	2.29	2.05	44.73	-8.42	-44.53	-57.63	0.03	0.05	2.5	0	61.76	0	0	-21	632	-67	-35
2024/02/29	0.1	-1.79	76.97	26.51	65.82	57.32	-0.06	-0.02	19	0	59.38	-0.01	-0.01	52	610	50	15
2024/03/01	0.15	0.38	56.81	40.81	21.72	11.85	-0.07	-0.01	-11	0	57	0.01	-0.02	-73	552	-84	12
2024/03/04	-0.43	0.66	-24.55	-6.13	3.07	12.29	-0.75	0.09	9	0	40	-0.01	0.02	144	535	165	22
2024/03/05	0.32	3.43	-17	-52.3	24.64	8.48	-0.76	0.02	-49.5	0	104	0	0.01	94	660	90	27
2024/03/06	0.45	-1.27	33.2	26.11	-14.46	-7.86	0.92	-0.02	-20	0	79	0	0	-76	593	-46	-53
2024/03/07	-0.77	-0.1	141.6	52.6	-21.33	-12.53	0	-0.13	9	0	80	0	0.03	-20	626	-21	32
2024/03/08	-1.14	-0.73	-57.5	-33.67	15.19	18.62	-0.88	0.01	0.5	0	77	0	0.03	-182	485	-189	-124
2024/03/11	1.1	-2.11	-55.3	-5.75	44.35	22.44	0.13	-0.06	-59	0	86	0	0	241	605	143	149
2024/03/12	0.35	0.33	187	57.33	8.23	-12.52	-0.29	-0.04	32.5	0	77	0	-0.01	-16	633	74	58
2024/03/13	-0.11	-0.46	44.55	-9.96	-25.13	-12.11	2.11	-0.05	-65.5	0	58	-0.01	0	-66	584	-39	-74
2024/03/14	0.19	2.37	-64.55	-14.83	-10.14	-5.6	1.39	0.09	-38.5	0	48	0.01	0.01	12	604	24	-2
2024/03/15	-2.92	0.9	0.7	-33.39	7.77	16.41	-0.08	-0.08	-34.5	0	68	0	-0.03	-125	570	-46	-13
2024/03/18	2.75	2	16.06	32.33	33.54	30.29	1.55	0.05	26.5	0	57	-0.01	0	97	590	-20	37
2024/03/19	-0.25	-0.56	48.92	29.09	-25.9	-22.17	0.49	0.03	39.5	0	62	0.01	-0.02	13	576	-20	-29
2024/03/20	0	-0.2	24.8	46.11	7.75	16.93	-1.43	-0.05	8	0	75	0	0	-26	540	-103	32
2024/03/21	-0.02	-1.52	160.84	16.91	-4.29	-2.58	-0.17	0.14	18	0	66	-0.01	0.04	-106	574	40	18
2024/03/22	-0.07	2.38	38.86	-7.35	-36.09	-29.08	-0.35	-0.03	9	0	60	0.01	-0.03	-35	508	-95	-156
2024/03/25	-0.31	3.42	55.66	-15.99	-19.24	-21.72	1.32	-0.01	-18	0	25	0	-0.03	152	527	171	95
2024/03/26	-0.14	-2.68	130.94	-14.61	17.99	5.17	-0.5	-0.01	-36.5	0	41	-0.01	0	1	509	78	77
2024/03/27	-0.16	0.18	75.83	44.91	-40.96	-38.34	-0.16	-0.08	-42	0	48	0	0	-23	559	-27	-60
2024/03/28	0.97	-0.6	29.45	5.86	18.17	17.52	1.39	0.04	1.5	0	59	0	-0.02	-27	547	-12	-33
2024/03/29	-0.82	1	0	1	16.52	30.51	1	1	-83	0	44	0.01	-0.02	15	484	-68	-53
